# Supplementary material for: Outcome and comparator choice in molar incisor hypomineralisation (MIH) intervention studies: a systematic review and social network analysis
Source: PubMed Central journal article supplement — BMJ Open. 2019 Aug 2;9(8):e028352. doi: 10.1136/bmjopen-2018-028352 (PMC6687020; doi:10.1136/bmjopen-2018-028352), 2019-08-02
Supplement: bmjopen-2018-028352.draft_revisions.pdf [file bmjopen-2018-028352.draft_revisions.pdf]

# BMJ Open

BMJ Open is committed to open peer review. As part of this commitment we make the peer review history of every article we publish publicly available.

When an article is published we post the peer reviewers' comments and the authors' responses online. We also post the versions of the paper that were used during peer review. These are the versions that the peer review comments apply to.

The versions of the paper that follow are the versions that were submitted during the peer review process. They are not the versions of record or the final published versions. They should not be cited or distributed as the published version of this manuscript.

BMJ Open is an open access journal and the full, final, typeset and author-corrected version of record of the manuscript is available on our site with no access controls, subscription charges or pay-per-view fees (<http://bmjopen.bmj.com>).

If you have any questions on BMJ Open's open peer review process please email [info.bmjopen@bmj.com](mailto:info.bmjopen@bmj.com)

# BMJ Open

## Outcome and comparator choice in Molar Incisor Hypomineralization (MIH) Intervention Studies: A Systematic Review and Social Network Analysis

|                               |                                                                                                                                                                                                                                                                                                                                                                                                                                                                         |
|-------------------------------|-------------------------------------------------------------------------------------------------------------------------------------------------------------------------------------------------------------------------------------------------------------------------------------------------------------------------------------------------------------------------------------------------------------------------------------------------------------------------|
| Journal:                      | <i>BMJ Open</i>                                                                                                                                                                                                                                                                                                                                                                                                                                                         |
| Manuscript ID                 | bmjopen-2018-028352                                                                                                                                                                                                                                                                                                                                                                                                                                                     |
| Article Type:                 | Research                                                                                                                                                                                                                                                                                                                                                                                                                                                                |
| Date Submitted by the Author: | 08-Dec-2018                                                                                                                                                                                                                                                                                                                                                                                                                                                             |
| Complete List of Authors:     | Elhennawy, Karim; Charite Universitätsmedizin Berlin, Dep. of Orthodontics, Dentofacial Orthopedics and Pedodontics<br>Krois, Joachim; Charité – Universitätsmedizin Berlin, Department of Operative and Preventive Dentistry<br>Jost-Brinkmann, Paul-Georg; Charité – Universitätsmedizin Berlin, Department of Orthodontics, Dentofacial Orthopedics and Pedodontics<br>Schwendicke, Falk; Charite Universitätsmedizin Berlin Campus Benjamin Franklin, Zahnerhaltung |
| Keywords:                     | Systematic review, Molar incisor hypomineralization, core outcome set, MIH, prevention, management                                                                                                                                                                                                                                                                                                                                                                      |
|                               |                                                                                                                                                                                                                                                                                                                                                                                                                                                                         |

SCHOLARONE™  
Manuscripts

## Outcome and comparator choice in Molar Incisor Hypomineralization (MIH) Intervention Studies: A Systematic Review and Social Network Analysis

Karim Elhennawy<sup>1, 2\*</sup>, Joachim Krois<sup>2</sup>, Paul-Georg Jost-Brinkmann<sup>1</sup>, Falk Schwendicke<sup>2</sup>

<sup>1</sup> Charité Centre for Dental and Craniofacial Sciences, Department of Orthodontics, Dentofacial Orthopedics and Pedodontics, Charité – Universitätsmedizin Berlin, Germany, Aßmannshauer Str. 4-6, 14197 Berlin, Germany

<sup>2</sup> Charité Centre for Dental and Craniofacial Sciences, Department of Operative and Preventive Dentistry, Charité – Universitätsmedizin Berlin, Germany, Aßmannshauer Str. 4-6, 14197 Berlin, Germany

### \* Corresponding author:

Karim Elhennawy

Charité Universitätsmedizin, Centre for Dental and Craniofacial Sciences

Department of Orthodontics, Dentofacial Orthopedics and Pedodontics and Department of Operative and Preventive Dentistry

Aßmannshauer Str. 4-6

14197 Berlin, Germany

**Phone:** +49 30 450 562594

**Fax:** +49 30 450 562952

**E-Mail:** [Karim.elhennawy@charite.de](mailto:Karim.elhennawy@charite.de)

### Keywords

Systematic review, Molar incisor hypomineralization, core outcome set, outcomes, MIH, prevention, management, intervention

**Tables:** 3

**Figures:** 3

**Word count:** 2866

## Abstract

**Introduction:** Outcome and comparator choice strongly determine the validity and implementation of clinical trial results. We aimed to assess outcome and comparator choice in intervention studies on Molar Incisor Hypomineralization (MIH) using systematic review and social network analysis (SNA).

**Methods:** Medline, Embase, Cochrane Central, Google Scholar, opengrey.eu as well as DRKS.de and Clinicaltrials.gov were searched for MIH intervention studies. The search covered the period from 1980-2018. Clinical single-/multi-arm, controlled/uncontrolled studies reporting on the management of MIH were included. Reported outcomes and comparators were extracted and categorized. SNA was used to evaluate comparator choice and the resulting trial networks .

**Results:** Of the 6575 identified records, 86 were evaluated in full-text and 25 studies (10 randomized controlled trials, 11 prospective and 4 retrospective cohort studies, respectively) were included. In total, 1113 patients with a mean age of 11 years (min/max 6/70 years) were included. Outcomes fell in one of ten different outcome categories: Restoration success, Aesthetic improvement, Pain and hypersensitivity management, Mineral gain, Space management, Anesthesia effectiveness, Preventive success, Efficiency, Quality of life, Periodontal health. Comparators were mainly restorative interventions (12 studies), remineralization (3), treatment of hypersensitivity (3), esthetic interventions (3), and orthodontic interventions (2). A highly clustered comparator network emerged.

**Conclusions:** MIH intervention studies recorded both clinically- and patient-centered outcomes. COS development should consider these and supplement them with outcomes on, for example, applicability. The high number of compared interventions tested in only few studies and our SNA results implicate that current evidence may not be robust.

### Strengths and limitations of this study

- Outcomes and comparators for MIH studies were assessed.
- A systematic review and network analysis was performed.
- Findings of this study will inform core outcomes definition.

## Introduction

There is increasing interest into the internal and external validity of clinical studies, as indicated, for example, by their risk of bias<sup>1 2</sup> or their reporting quality<sup>3</sup>. Two aspects which only recently came into the focus but impact on validity are (1) outcome and (2) comparator choice.

So far, most clinical researchers chose the outcomes based on their understanding of what was relevant or not; the involvement of further stakeholders into outcome choice was seldom considered. This impacts on the relevance of study findings and may limit their applicability. Also, researchers usually collected a range of outcomes, without necessarily reporting all of them later on. This may lead to selective reporting and introduce significant bias. The chosen outcomes and outcome measures may further suffer from limited comparability across studies, decreasing the chance to make the best use of clinical studies by synthesizing them. Outcome choice is thus relevant for study validity, applicability and relevance, and implementation into practice<sup>4-6</sup>.

Comparator choice impacts on the overall usefulness and validity of evidence<sup>7</sup>. Again, usually, most clinical researchers choose the comparators themselves, without necessarily consulting patients or further stakeholders. Comparators relevant to patients, for example, may hence not be evaluated, and certain comparators may be over-proportionally employed<sup>8-10</sup>. The resulting gaps in the evidence may mean important information on possibly useful comparators are unavailable. Also, comparisons against placebo or no intervention (in single arm studies) or less effective options (so called straw men) can lead to overestimation of effectiveness<sup>9-11</sup>. Repeated chain-linked comparisons against less-than-optimal standards was found to significantly distort the totality of evidence<sup>9-11</sup>. Comparator choice is relevant to make clinical research in a specific field useable, applicable, and informative.

The present study assessed outcome and comparator choice in intervention studies on Molar Incisor Hypomineralisation (MIH), a highly prevalent dental developmental disorder with a significant burden for patients and high treatment needs<sup>12</sup>.

Given the broad spectrum of clinical presentations, individual needs and available treatment modalities, managing MIH is challenging for most practitioners<sup>13-15</sup>. Assessing the outcome and comparator choice in MIH intervention studies seems warranted. Such assessment is further useful to inform the development of a Core

1  
2  
3 Outcome Set (COS) for MIH management and prevention studies. COS are a  
4 minimum set of outcomes which have been agreed in a systematic consensus process  
5 by a diverse group of stakeholders (patients, dentists, researchers etc). COS  
6 overcome the problem of a possibly limited relevance of chosen outcomes, the risk of  
7 selective reporting and the lack of synthesizability of study findings<sup>16</sup>. A range of COS  
8 development initiatives are currently underway in dentistry<sup>17-21</sup>.  
9

10  
11  
12 We aimed to review the outcomes used in MIH interventional studies to inform the  
13 development of a COS on MIH. We further aimed to assess the comparators used in  
14 these studies and to analyze the resulting study network. This was done using social  
15 network analysis (SNA), a method for evaluating the relationships between actors in  
16 a network<sup>8</sup> which has been introduced to dentistry recently<sup>22</sup>. As secondary aim, we  
17 evaluated if studies clearly indicated their primary outcome, and used a sample size  
18 estimation based on this outcome, and if studies were registered before performing  
19 them, as should be expected.  
20  
21  
22  
23  
24  
25  
26  
27  
28  
29

## 30 **Methods**

31  
32 This review was registered on the COMET initiative website<sup>1</sup>. In parts, it builds on a  
33 previously published review on MIH management<sup>23</sup>.  
34  
35  
36  
37  
38

### 39 *Search strategy*

40  
41 The following search was adapted for each database:

42  
43 (((((treatment) OR management) OR prevention) AND molar incisor  
44 hypomineralisation) OR molar incisor hypomineralization) OR mih.  
45  
46

47 Searches were developed and run individually for Medline, Embase, Cochrane  
48 Central, Google Scholar, opengrey.eu as well as DRKS and Clinicaltrials.gov and  
49 cross references were performed without any language restrictions. The search  
50 covered the period from 01.01.1980 to 15.05.2018 (Fig. 1).  
51  
52  
53  
54  
55

### 56 *Data collection*

57  
58  
59  
60

1  
2  
3 Inclusion criteria: We included clinical studies in patients diagnosed with MIH. Studies  
4 reported on prevention and/or management interventions for MIH teeth. There were  
5 no restrictions on setting, time of follow-up, or age.  
6  
7

8  
9 Selection process: Two authors (FS, KE) screened titles independently and compared  
10 their findings. In case of disagreement, titles were included to obtain full-texts. Full-  
11 texts were assessed independently after de-duplication. In cases of disagreement,  
12 studies were included after consensus was reached through discussion.  
13  
14

15  
16 Data extraction: The following data was extracted duplicatively and independently by  
17 two authors (KE and FS) following calibration using a pilot database:  
18

- 19 • Study details (author name, title, journal, year of publication);
  - 20 • Study characteristics;
    - 21 ○ Study setting (primary or secondary care)
    - 22 ○ Number and age of participants
    - 23 ○ Study type (controlled or uncontrolled, pro- or retrospective)
    - 24 ○ Target condition (MIH lesions on molars, incisors, or both)
    - 25 ○ Number of study arms
    - 26 ○ Interventions compared
    - 27 ○ Follow-up period
    - 28 ○ Outcomes assessed, separated for primary and secondary outcome(s).  
29 An outcome was considered a primary outcome if it was stated as such,  
30 or where the report clearly focused on one outcome. If no primary  
31 outcome was identifiable or multiple outcomes were reported, these  
32 were considered secondary outcomes.
    - 33 ○ Outcome measures
  - 34 • Sample size estimation (reported/not)
  - 35 • Trial registration (yes/no).
- 36  
37  
38  
39  
40  
41  
42  
43  
44  
45  
46  
47  
48  
49  
50  
51

### 52 *Data synthesis*

53  
54 A list of outcomes was compiled and outcomes with different verbatim terms but similar  
55 meanings gathered using a single agreed term. Outcomes were grouped within  
56 outcome categories; these were refined through group discussion before all outcomes  
57 were categorized using the final agreed terms. The final list of outcome categories  
58  
59  
60

1  
2  
3 comprised 10 items; Restoration success, Aesthetic improvement, Pain and  
4 hypersensitivity management, Mineral gain, Space management, Anesthesia  
5 effectiveness, Preventive success, Efficiency, Quality of life and Periodontal health.  
6  
7 The use of different outcome categories was analyzed via descriptive statistics.  
8  
9 Exemplary outcomes and outcome measures were allocated to one of these outcome  
10 categories by discussion and agreement of two authors (KE and FS). Where there  
11 was disagreement, consensus was achieved through discussion with all authors.  
12  
13  
14

15  
16 A list of comparators was compiled and comparators grouped into agreed categories  
17 (Table 2). The granularity of these categories allowed to capture specific comparators  
18 (like “glass ionomer cement restoration”) while grouping similar comparators in the  
19 same category (e.g. different cement brands). Comparator choice was analyzed via  
20 SNA. In SNA, nodes (termed ‘vertices’) are formed by comparators, and are connected  
21 by edges (comparisons made within the same trial). In a graphical analysis, the node  
22 diameter represents the number of comparator arms forming the node and thickness  
23 of edges represents the number of direct comparisons. We also color-coded edges for  
24 studies on MIH in molars versus incisors. Statistical analysis included the assessment  
25 of the degree (average number of comparators per node) and the clustering coefficient  
26 (values of one indicate that all possible connections were made, while values of 0,  
27 indicate that only the minimum number of connections were made) <sup>24-26</sup>. Graphical  
28 analysis was performed using Cytoscape 3.4.0 (National Institute of General Medical  
29 Sciences, Bethesda, USA), while for statistical analysis the Python package NetworkX  
30 was used.  
31  
32  
33  
34  
35  
36  
37  
38  
39  
40

#### 41 *Patient and Public Involvement*

42 Patients were not involved in this study at this point, but will so in the core outcomes  
43 definition.  
44  
45  
46  
47  
48

## 49 **Results**

### 50 *Included studies*

51 The database search yielded 6575 records; 3117 remained after de-duplication. There  
52 were 86 potentially relevant articles and the full texts of all these 86 articles were  
53 located (100% retrieval rate); 25 met the inclusion criteria and were included (Fig.  
54 1).  
55  
56  
57  
58  
59  
60



### *Characteristics of included trials*

Of the 25 included studies, all (100%) were conducted in a secondary care setting (hospital or university). The total number of participants was 1113; per study a mean of 45 (range 12 – 300) participants were included. Only children (mean age <12 years) were included in 23 included reports (92%). Only one (4%) study reported on adults, too (mean age 33 years). In another publication (4%) it was not possible to determine the age of the participants. There were 8 (32%) one-arm studies, 12 (48%) two-arm studies, 2 (8%) three-arm studies, and 3 (12%) multi-arm studies. Further details on the included studies can be found in Table 1.

### *Outcome choice*

As mentioned, ten outcome categories were deduced from the included studies (Fig. 2). The most frequent specific categories were “Restoration success” and “Pain and hypersensitivity management”; with 12 (35%) and 5 (15%) studies reporting them, respectively. The next most common were “Aesthetic improvement” (4, studies 12%), “Mineral gain” (3 studies, 9%), and “Space management”, “Anesthesia effectiveness” and “Preventive success” (each 2 studies, or 6%). The least common ones were “Quality of life”, “Efficiency” and “Periodontal health” (each only 1 study, or 3%). Outcome categories that have increased in use (from 2000-2009 to 2010-2018) included “Aesthetic improvement”, “Mineral gain”, “Efficiency”, and “Periodontal health”.

### *Comparator choice*

A well connected network of comparators emerged (Fig. 3). Certain comparators were more frequently chosen than others. Comparisons in MIH molars dominated the network. Many studies compared different restorative strategies for MIH molars, normally composite (with different brands also tested against each other), metal, ceramic or cement restorations. The network graph also highlights that many studies had no comparator, i.e. were single-armed. Hence, the connectivity of the study network is even lower than indicated by the SNA. The median degree was seven,

1  
2  
3 ranging between 1 and 9. The cluster coefficient was 0.69, indicating that there were  
4 “cliques” of comparators present, with comparators being mainly compared within and  
5 not across these cliques.  
6  
7  
8  
9

### 10 11 *Primary outcome and sample size calculation*

12  
13 Primary outcomes could be identified in 24 (96%) reports (Table 3). Throughout all  
14 years (2000 to 2018), “Restoration success” was the most frequently assessed  
15 primary outcome (12). In contrast, “Pain and hypersensitivity management” was not  
16 measured as a primary outcome in any study between 2000-2009, and in only 3  
17 studies (11%) between 2010 and 2018.  
18  
19

20 Information on sample size calculation was provided in 4 (16%) reports, all four being  
21 published between 2016 and 2018. Of the 4 reports which had a sample size  
22 calculation, 2 (50%) related this calculation to the primary outcome.  
23  
24  
25  
26  
27  
28  
29

### 30 31 *Trial registration reporting*

32 Only 4 (16%) of all articles reported a trial registration<sup>27</sup>. In the 10 years following the  
33 publication of the first CONSORT statement (2001-2010), not a single report included  
34 a trial registration. Following the publication of the second CONSORT statement  
35 (2011-2018), this increased to 16%.  
36  
37  
38  
39  
40  
41

## 42 **Discussion**

43  
44 This systematic review assessed outcome and comparator choice in MIH intervention  
45 studies, and their change over time. We found that studies recorded a large range of  
46 outcomes, especially when considering the limited number of studies overall, and that  
47 the diversity of these outcomes is increasing. This is reassuring, and the findings of  
48 this review are helpful to develop a COS. We also found that despite the low number  
49 of studies available, a large range of different interventions were tested, which led to  
50 a highly clustered and not well connected network. This highlights that the current  
51 body of evidence on MIH interventions is likely not robust, and may change with more  
52 studies coming in (strengthening the network).  
53  
54  
55  
56  
57  
58  
59  
60

1  
2  
3 The outcomes used in MIH intervention studies focused on two areas; restoration  
4 success (measured via the USPHS criteria or similar tools) and pain and  
5 hypersensitivity management (measured via scales like the Visual analogue scale or  
6 the Schiff Cold Air Sensitivity Scale). Combined, these two areas accounted for 45%  
7 of primary outcomes and for 50% of all reported outcomes. However, the use of other  
8 outcome categories like quality of life and economic aspects appears to be of growing,  
9 reflecting an ongoing shift to patient-centered care (and research) and the increasing  
10 relevance of health economics in today's resource-limited healthcare settings. We will,  
11 in the next stage of our COS development, suggest these outcomes to be included in  
12 the COS on MIH intervention studies, and will seek stakeholder consensus on their  
13 inclusion (or not).  
14  
15

16  
17 We also investigated further outcome-related aspects in the included studies. For  
18 example, trial registration, one of the recommendations of the CONSORT statement  
19 <sup>28 29</sup>, was found in only four studies (and even very recent studies did not commonly  
20 report on this). While such registration may be seen as a prerogative of controlled  
21 trials, also single-arm prospective trials, for example, should clearly state what is to be  
22 investigated using which methods and tools in what population before commencing  
23 the study. This does not seem to be the case. Registration would help to reduce  
24 selective outcome reporting and could also assist in improving reporting standards (and  
25 general methodology) in MIH intervention studies.  
26  
27

28  
29 Also, of the 25 reports, only 4 studies reported a sample size calculation, and of these,  
30 only 2 related this to the primary outcome. Again, while such calculations are mainly  
31 demanded for controlled prospective trials, researchers should have a rational basis  
32 for calculating the number of participants needed in any study (regardless of its  
33 design), be it to ascertain that differences between the interventions can be detected  
34 with a planned level of statistical confidence or be it to reduce statistical noise  
35 (allowing somewhat firm conclusions). Sample size calculation is a key  
36 recommendation in the CONSORT statement, published in 2001 <sup>29</sup> and revised in  
37 2010 <sup>28</sup>. It was promising to find that, since this revision, more publications reported  
38 on a sample size calculation (while the overall number of remained low).  
39  
40

41  
42 Our network analysis indicated a network with limited connectivity, but high clustering.  
43 The limited connectivity was grounded in a relatively high number of comparators  
44 being tested in only few studies and comparisons. In addition, and not captured by the  
45  
46  
47  
48  
49  
50  
51  
52  
53  
54  
55  
56  
57  
58  
59  
60

1  
2  
3 SNA, sample sizes were limited (the median was only 33). Clustering indicates the  
4 existence of cliques of comparators, with comparisons being conducted mainly within  
5 a subgroup of comparators. This decreases the overall information of comparisons  
6 across all interventions. Of course, this may be grounded in indications. For example,  
7 restorative interventions will usually be compared only against each other, as they will  
8 only be applied if non-restorative strategies are not an option. This was also the case  
9 here. Moreover, we found clustering along study focus, i.e. the management of molars  
10 (focusing largely on hypersensitivity or post-eruptive breakdown) and incisors (often  
11 involving interventions to improve the aesthetic appearance).

12  
13  
14  
15  
16  
17  
18  
19 This study has a number of limitations. First, the effort to improve COS methodology  
20 is ongoing, and our review used only one of several available strategies suggested for  
21 COS developers. For example, it seems that to reach saturation on outcomes and  
22 outcome categories, it may not be necessary to search multiple databases <sup>30</sup>, while  
23 we did so, also as this review was an update of a previous one and we aimed to apply  
24 the same methodology. Second, developing outcome categories and assigning  
25 specific verbatim outcomes to these categories is challenging <sup>19</sup>, often as outcomes  
26 are either inter-related or composites, capturing different outcome categories <sup>31</sup>. While  
27 there is no acknowledged MIH outcome classification system, it is clear that alternative  
28 classifications may have resulted in changes to the granularity and focus of the results.  
29 Third, researchers tend to publish multiple from the same clinical trial <sup>32</sup>. This can be  
30 necessary to report on the dataset at different time points, or to report on multiple  
31 analyses. However, data is then divided across multiple publications, and linking  
32 articles together or with registered protocols can be difficult. We assume to have  
33 captured all articles accordingly given the field to be limited. Last, in order to limit  
34 selective outcome bias and in the attempt of including the most recent trials, registries  
35 were searched in our study, too. This however, has its limitations, since there are often  
36 incomplete or unclear registrations, and we were only limitedly able to extract data.  
37  
38  
39  
40  
41  
42  
43  
44  
45  
46  
47  
48  
49  
50

## 51 52 53 54 **Conclusions**

55  
56 Outcomes reported in interventional trials for the management and prevention of MIH  
57 focused on the performance of restorative materials or and the management of pain  
58 and hypersensitivity associated with MIH-affected teeth. Outcomes related to oral-  
59  
60

1  
2  
3 health related quality of life and economics have grown in use and are likely to be  
4 important in the future. Patient-reported or patient-centered outcomes were rarely  
5 reported. COS development should include these and be supported by new outcomes,  
6 e.g. on applicability. The high number of compared interventions tested in only few  
7 studies and our SNA results implicate that current evidence may not be robust.  
8  
9  
10  
11  
12  
13

#### 14 **Trial status (Registration):**

15  
16 COMET initiative online <http://www.comet-initiative.org/studies/details/1155> [1]  
17  
18

#### 19 **Competing interests**

20  
21 The authors declare no conflict of interest.  
22  
23  
24

#### 25 **Funding**

26  
27 No funding was acquired.  
28  
29

#### 30 **Ethical approval**

31  
32 Not applicable.  
33  
34

#### 35 **Author contributions**

36  
37 The study was conceived by KE and FS. KE and JK analyzed, interpreted the data.  
38  
39 KE, P-G J-B and FS wrote the manuscript. All authors read and approved the  
40  
41 manuscript.  
42  
43  
44

#### 45 **Transparency declaration**

46  
47 The lead author\* affirms that this manuscript is an honest, accurate, and transparent  
48  
49 account of the study being reported; that no important aspects of the study have been  
50  
51 omitted; and that any discrepancies from the study as planned (and, if relevant,  
52  
53 registered) have been explained.  
54  
55  
56  
57  
58  
59  
60

## References

1. COMET. COMET initiative database, Accessed 23 Jan 2017.
2. Higgins J, Altman D, Gotzsche P, et al. The Cochrane Collaboration's tool for assessing risk of bias in randomised trials. *BMJ* 2011;343:d5928.
3. Schulz K, Altman D, Moher D, et al. CONSORT 2010 Statement: updated guidelines for reporting parallel group randomised trials. *BMC Medicine* 2010;8(1):18.
4. Prinsen CA, Vohra S, Rose MR, et al. Core Outcome Measures in Effectiveness Trials (COMET) initiative: protocol for an international Delphi study to achieve consensus on how to select outcome measurement instruments for outcomes included in a 'core outcome set'. *Trials* 2014;15(1):247.
5. Chiarotto A, Ostelo RW, Turk DC, et al. Core outcome sets for research and clinical practice. *Brazilian journal of physical therapy* 2017;21(2):77-84. doi: 10.1016/j.bjpt.2017.03.001 [published Online First: 2017/05/04]
6. Levey C, Innes N, Schwendicke F, et al. Outcomes in randomised controlled trials in prevention and management of carious lesions: a systematic review. *Trials* 2017;18(1):515. doi: 10.1186/s13063-017-2256-1 [published Online First: 2017/11/04]
7. Ioannidis JP, Greenland S, Hlatky MA, et al. Increasing value and reducing waste in research design, conduct, and analysis. *Lancet* 2014;383(9912):166-75. doi: 10.1016/s0140-6736(13)62227-8 [published Online First: 2014/01/15]
8. Rizos EC, Salanti G, Kontoyiannis DP, et al. Homophily and co-occurrence patterns shape randomized trials agendas: illustration in antifungal agents. *Journal of clinical epidemiology* 2011;64(8):830-42. doi: 10.1016/j.jclinepi.2010.11.017 [published Online First: 2011/03/18]

- 1  
2  
3 9. Salanti G, Higgins JP, Ades AE, et al. Evaluation of networks of randomized trials.  
4  
5 *Statistical methods in medical research* 2008;17(3):279-301. doi:  
6  
7 10.1177/0962280207080643 [published Online First: 2007/10/11]  
8  
9
- 10 10. Salanti G, Kavvoura FK, Ioannidis JP. Exploring the geometry of treatment  
11  
12 networks. *Annals of internal medicine* 2008;148(7):544-53. [published Online  
13  
14 First: 2008/04/02]  
15  
16
- 17 11. Salanti G. Indirect and mixed-treatment comparison, network, or multiple-  
18  
19 treatments meta-analysis: many names, many benefits, many concerns for the  
20  
21 next generation evidence synthesis tool. *Research Synthesis Methods*  
22  
23 2012;3(2):80-97. doi: 10.1002/jrsm.1037  
24  
25
- 26 12. Schwendicke F, Elhennawy K, Reda S, et al. Global burden of molar incisor  
27  
28 hypomineralization. *Journal of dentistry* 2018;68:10-18. doi:  
29  
30 10.1016/j.jdent.2017.12.002 [published Online First: 2017/12/10]  
31  
32
- 33 13. Weerheijm KL, Duggal M, Mejare I, et al. Judgement criteria for molar incisor  
34  
35 hypomineralisation (MIH) in epidemiologic studies: a summary of the European  
36  
37 meeting on MIH held in Athens, 2003. *European journal of paediatric dentistry*  
38  
39 : official journal of European Academy of Paediatric Dentistry 2003;4(3):110-3.  
40  
41 [published Online First: 2003/10/08]  
42  
43
- 44 14. Weerheijm KL. Molar incisor hypomineralization (MIH): clinical presentation,  
45  
46 aetiology and management. *Dental update* 2004;31(1):9-12. [published Online  
47  
48 First: 2004/03/06]  
49  
50
- 51 15. Lygidakis NA, Wong F, Jalevik B, et al. Best Clinical Practice Guidance for  
52  
53 clinicians dealing with children presenting with Molar-Incisor-  
54  
55 Hypomineralisation (MIH): An EAPD Policy Document. *European archives of*  
56  
57  
58  
59  
60

- 1  
2  
3 *paediatric dentistry : official journal of the European Academy of Paediatric*  
4  
5 *Dentistry* 2010;11(2):75-81. [published Online First: 2010/04/21]  
6  
7
- 8 16. Tugwell P, Boers M, Brooks P, et al. OMERACT: an international initiative to  
9  
10 improve outcome measurement in rheumatology. *Trials* 2007;8:38. doi:  
11  
12 10.1186/1745-6215-8-38  
13
- 14 17. Innes NP, Schwendicke F, Lamont T. How do we create, and improve, the  
15  
16 evidence base? *Br Dent J* 2016;220(12):651-5. doi: 10.1038/sj.bdj.2016.451  
17  
18
- 19 18. Lamont T, Schwendicke F, Innes N. Why we need a core outcome set for trials of  
20  
21 interventions for prevention and management of caries. *Evidence-based*  
22  
23 *dentistry* 2015;16(3):66-8. doi: 10.1038/sj.ebd.6401109 [published Online First:  
24  
25 2015/10/24]  
26  
27
- 28 19. Fleming PS, Koletsi D, O'Brien K, et al. Are dental researchers asking patient-  
29  
30 important questions? A scoping review. *Journal of dentistry* 2016;49:9-13. doi:  
31  
32 10.1016/j.jdent.2016.04.002 [published Online First: 2016/04/14]  
33  
34
- 35 20. Hancocks S. Asking the right questions. *British dental journal* 2016;221(2):47. doi:  
36  
37 10.1038/sj.bdj.2016.511 [published Online First: 2016/07/23]  
38  
39
- 40 21. Smail-Faugeron V, Fron Chabouis H, Durieux P, et al. Development of a core set  
41  
42 of outcomes for randomized controlled trials with multiple outcomes--example  
43  
44 of pulp treatments of primary teeth for extensive decay in children. *PLoS One*  
45  
46 2013;8(1):e51908. doi: 10.1371/journal.pone.0051908  
47  
48
- 49 22. Schwendicke F, Blunck U, Paris S, et al. Choice of comparator in restorative trials:  
50  
51 A network analysis. *Dental materials : official publication of the Academy of*  
52  
53 *Dental Materials* 2015;31(12):1502-9. doi: 10.1016/j.dental.2015.09.021  
54  
55  
56  
57  
58  
59  
60



- 1  
2  
3 23. Elhennawy K, Schwendicke F. Managing molar-incisor hypomineralization: A  
4  
5 systematic review. *Journal of dentistry* 2016;55:16-24. doi:  
6  
7 10.1016/j.jdent.2016.09.012 [published Online First: 2016/10/04]  
8  
9
- 10 24. Jackson M. Social and Economic Networks. Princeton: Princeton University Press  
11  
12 2008.  
13
- 14 25. Mahony H, Tsalatsanis A, Kumar A, et al. Evolution of treatment regimens in  
15  
16 multiple myeloma: a social network analysis. *PloS one* 2014;9(8):e104555. doi:  
17  
18 10.1371/journal.pone.0104555 [published Online First: 2014/08/15]  
19  
20
- 21 26. Valente T. Social networks and health: models, methods, and applications. New  
22  
23 York: Oxford University Press 2010.  
24
- 25 27. Schulz KF, Altman DG, Moher D, et al. CONSORT 2010 Statement: updated  
26  
27 guidelines for reporting parallel group randomized trials. *Open Med*  
28  
29 2010;4(1):e60-8.  
30  
31
- 32 28. Moher D, Hopewell S, Schulz KF, et al. CONSORT 2010 explanation and  
33  
34 elaboration: updated guidelines for reporting parallel group randomised trials.  
35  
36 *BMJ* 2010;340:c869. doi: 10.1136/bmj.c869  
37  
38
- 39 29. Moher D, Schulz KF, Altman DG. The CONSORT statement: revised  
40  
41 recommendations for improving the quality of reports of parallel-group  
42  
43 randomised trials. *Lancet* 2001;357(9263):1191-4.  
44  
45
- 46 30. Gargon E, Williamson PR, Clarke M. Collating the knowledge base for core  
47  
48 outcome set development: developing and appraising the search strategy for a  
49  
50 systematic review. *BMC medical research methodology* 2015;15:26. doi:  
51  
52 10.1186/s12874-015-0019-9 [published Online First: 2015/04/19]  
53  
54
- 55 31. Echevarria C, Sinha IP. Heterogeneity in the measurement and reporting of  
56  
57 outcomes in studies of electronic cigarette use in adolescents: a systematic  
58  
59  
60

- 1  
2  
3 analysis of observational studies. *Tob Control* 2016 doi:  
4 10.1136/tobaccocontrol-2015-052881  
5  
6  
7  
8 32. Ebrahim S, Montoya L, Kamal El Din M, et al. Randomized trials are frequently  
9 fragmented in multiple secondary publications. *Journal of clinical epidemiology*  
10 2016;79:130-39. doi: 10.1016/j.jclinepi.2016.05.016 [published Online First:  
11 2016/07/09]  
12  
13  
14  
15  
16  
17 33. Koch MJ, Garcia-Godoy F. The clinical performance of laboratory-fabricated  
18 crowns placed on first permanent molars with developmental defects. *Journal*  
19 *of the American Dental Association (1939)* 2000;131(9):1285-90.  
20  
21  
22  
23  
24 34. Lygidakis NA, Chaliasou A, Siounas G. Evaluation of composite restorations in  
25 hypomineralised permanent molars: a four year clinical study. *European journal*  
26 *of paediatric dentistry : official journal of European Academy of Paediatric*  
27 *Dentistry* 2003;4(3):143-8. [published Online First: 2003/10/08]  
28  
29  
30  
31  
32  
33 35. Zagdwon AM, Fayle SA, Pollard MA. A prospective clinical trial comparing  
34 preformed metal crowns and cast restorations for defective first permanent  
35 molars. *European journal of paediatric dentistry : official journal of European*  
36 *Academy of Paediatric Dentistry* 2003;4(3):138-42. [published Online First:  
37 2003/10/08]  
38  
39  
40  
41  
42  
43  
44 36. Kotsanos N, Kaklamanos EG, Arapostathis K. Treatment management of first  
45 permanent molars in children with Molar-Incisor Hypomineralisation. *European*  
46 *journal of paediatric dentistry : official journal of European Academy of*  
47 *Paediatric Dentistry* 2005;6(4):179-84. [published Online First: 2006/01/24]  
48  
49  
50  
51  
52  
53  
54 37. Mejare I, Bergman E, Grindefjord M. Hypomineralized molars and incisors of  
55 unknown origin: treatment outcome at age 18 years. *International journal of*  
56 *paediatric dentistry / the British Paedodontic Society [and] the International*  
57  
58  
59  
60

- 1  
2  
3           *Association of Dentistry for Children* 2005;15(1):20-8. doi: 10.1111/j.1365-  
4           263X.2005.00599.x [published Online First: 2005/01/25]  
5  
6  
7  
8 38. Jalevik B, Moller M. Evaluation of spontaneous space closure and development of  
9           permanent dentition after extraction of hypomineralized permanent first molars.  
10           *International journal of paediatric dentistry / the British Paedodontic Society*  
11           *[and] the International Association of Dentistry for Children* 2007;17(5):328-35.  
12           doi: 10.1111/j.1365-263X.2007.00849.x [published Online First: 2007/08/09]  
13  
14  
15  
16  
17  
18  
19 39. Lygidakis NA, Dimou G, Stamataki E. Retention of fissure sealants using two  
20           different methods of application in teeth with hypomineralised molars (MIH): a  
21           4 year clinical study. *European archives of paediatric dentistry : official journal*  
22           *of the European Academy of Paediatric Dentistry* 2009;10(4):223-6. [published  
23           Online First: 2009/12/10]  
24  
25  
26  
27  
28  
29  
30  
31 40. Baroni C, Marchionni S. MIH supplementation strategies: prospective clinical and  
32           laboratory trial. *Journal of dental research* 2011;90(3):371-6. doi:  
33           10.1177/0022034510388036 [published Online First: 2010/12/15]  
34  
35  
36  
37  
38 41. Gaardmand E, Poulsen S, Haubek D. Pilot study of minimally invasive cast  
39           adhesive copings for early restoration of hypomineralised first permanent  
40           molars with post-eruptive breakdown. *European archives of paediatric dentistry*  
41           *: official journal of the European Academy of Paediatric Dentistry*  
42           2013;14(1):35-9. doi: 10.1007/s40368-012-0002-7 [published Online First:  
43           2013/03/28]  
44  
45  
46  
47  
48  
49  
50  
51 42. Cabasse C, Marie-Cousin A, Huet A, et al. Computer-assisted intraosseous  
52           anaesthesia for molar and incisor hypomineralisation teeth. A preliminary study.  
53           *Odonto-stomatologie tropicale = Tropical dental journal* 2015;38(149):5-9.  
54           [published Online First: 2015/06/11]  
55  
56  
57  
58  
59  
60

- 1  
2  
3 43. Fragelli CM, Souza JF, Jeremias F, et al. Molar incisor hypomineralization (MIH):  
4 conservative treatment management to restore affected teeth. *Brazilian oral*  
5 *research* 2015;29 doi: 10.1590/1807-3107BOR-2015.vol29.0076 [published  
6 Online First: 2015/06/18]  
7  
8  
9  
10  
11  
12 44. Bekes K, Heinzelmann K, Lettner S, et al. Efficacy of desensitizing products  
13 containing 8% arginine and calcium carbonate for hypersensitivity relief in MIH-  
14 affected molars: an 8-week clinical study. *Clinical oral investigations* 2016 doi:  
15 10.1007/s00784-016-2024-8 [published Online First: 2016/12/23]  
16  
17  
18  
19  
20  
21 45. Bakkal M, Abbasoglu Z, Kargul B. The Effect of Casein Phosphopeptide-  
22 Amorphous Calcium Phosphate on Molar-Incisor Hypomineralisation: A Pilot  
23 Study. *Oral health & preventive dentistry* 2017;15(2):163-67. doi:  
24 10.3290/j.ohpd.a37928 [published Online First: 2017/03/23]  
25  
26  
27  
28  
29  
30 46. de Souza JF, Fragelli CB, Jeremias F, et al. Eighteen-month clinical performance  
31 of composite resin restorations with two different adhesive systems for molars  
32 affected by molar incisor hypomineralization. *Clinical oral investigations*  
33 2017;21(5):1725-33. doi: 10.1007/s00784-016-1968-z [published Online First:  
34 2016/10/16]  
35  
36  
37  
38  
39  
40  
41 47. Fragelli CMB, Souza JF, Bussaneli DG, et al. Survival of sealants in molars  
42 affected by molar-incisor hypomineralization: 18-month follow-up. *Brazilian oral*  
43 *research* 2017;31:e30. doi: 10.1590/1807-3107BOR-2017.vol31.0030  
44 [published Online First: 2017/05/11]  
45  
46  
47  
48  
49  
50  
51 48. Sonmez H, Saat S. A Clinical Evaluation of Deproteinization and Different Cavity  
52 Designs on Resin Restoration Performance in MIH-Affected Molars: Two-Year  
53 Results. *The Journal of clinical pediatric dentistry* 2017;41(5):336-42. doi:  
54 10.17796/1053-4628-41.5.336 [published Online First: 2017/09/06]  
55  
56  
57  
58  
59  
60

- 1  
2  
3 49. Grossi JA, Cabral RN, Ribeiro APD, et al. Glass hybrid restorations as an  
4  
5 alternative for restoring hypomineralized molars in the ART model. *BMC oral*  
6  
7 *health* 2018;18(1):65. doi: 10.1186/s12903-018-0528-0 [published Online First:  
8  
9 2018/04/20]  
10  
11  
12 50. Koleventi A, Sakellari D, Arapostathis KN, et al. Periodontal Impact of Preformed  
13  
14 Metal Crowns on Permanent Molars of Children and Adolescents: A Pilot Study.  
15  
16 *Pediatric dentistry* 2018;40(2):117-21. [published Online First: 2018/04/18]  
17  
18  
19 51. Pasini M, Giuca MR, Scatena M, et al. Molar incisor hypomineralization treatment  
20  
21 with casein phosphopeptide and amorphous calcium phosphate in children.  
22  
23 *Minerva stomatologica* 2018;67(1):20-25. doi: 10.23736/s0026-  
24  
25 4970.17.04086-9 [published Online First: 2017/10/05]  
26  
27  
28 52. Wong FS, Winter GB. Effectiveness of microabrasion technique for improvement  
29  
30 of dental aesthetics. *British dental journal* 2002;193(3):155-8. doi:  
31  
32 10.1038/sj.bdj.4801511a [published Online First: 2002/09/06]  
33  
34  
35 53. Ozgul BM, Saat S, Sonmez H, et al. Clinical evaluation of desensitizing treatment  
36  
37 for incisor teeth affected by molar-incisor hypomineralization. *The Journal of*  
38  
39 *clinical pediatric dentistry* 2013;38(2):101-5. [published Online First:  
40  
41 2013/01/01]  
42  
43  
44 54. Sheoran N, Garg S, Damle SG, et al. Esthetic management of developmental  
45  
46 enamel opacities in young permanent maxillary incisors with two microabrasion  
47  
48 techniques--a split mouth study. *Journal of esthetic and restorative dentistry :*  
49  
50 *official publication of the American Academy of Esthetic Dentistry [et al]*  
51  
52 2014;26(5):345-52. doi: 10.1111/jerd.12096 [published Online First:  
53  
54 2014/03/05]  
55  
56  
57  
58  
59  
60

- 1  
2  
3 55. Restrepo M, Jeremias F, Santos-Pinto L, et al. Effect of Fluoride Varnish on  
4 Enamel Remineralization in Anterior Teeth with Molar Incisor  
5 Hypomineralization. *The Journal of clinical pediatric dentistry* 2016;40(3):207-  
6  
7  
8  
9  
10 10. doi: 10.17796/1053-4628-40.3.207 [published Online First: 2016/07/30]  
11  
12  
13  
14  
15  
16  
17  
18  
19  
20  
21  
22  
23  
24  
25  
26  
27  
28  
29  
30  
31  
32  
33  
34  
35  
36  
37  
38  
39  
40  
41  
42  
43  
44  
45  
46  
47  
48  
49  
50  
51  
52  
53  
54  
55  
56  
57  
58  
59  
60

For peer review only

**Table 1.** Characteristics of included studies (n = 25). Studies were separated according to target condition (MIH in molars or incisors), and ordered chronologically.

| Author                              | Year | Setting | N part. | Age   | Study type | Follow-up (months) | Trial reg. | No. Of Arms | P Cal. |
|-------------------------------------|------|---------|---------|-------|------------|--------------------|------------|-------------|--------|
| <b>Molars</b>                       |      |         |         |       |            |                    |            |             |        |
| Koch and Garcia-Godoy <sup>33</sup> | 2000 | Uni. H  | 12      | 6-8   | Pro Co     | 24-60              | n          | 3           | n      |
| Lygidakis et al. <sup>34</sup>      | 2003 | Uni. H  | 46      | 8-10  | Pro Co     | 48                 | n          | 1           | n      |
| Zagdwon et al. <sup>35</sup>        | 2003 | Uni. H  | 17      | 6-16  | RCT        | 12-24              | n          | 2           | y      |
| Kotsanos et al. <sup>36</sup>       | 2005 | Uni. H  | 72      | 8     | Retro Co   | 52                 | n          | 2           | n      |
| Mejare et al. <sup>37</sup>         | 2005 | Uni. H  | 76      | 6-17  | Retro Co   | 62                 | n          | 7           | n      |
| Jalevik and Moller <sup>38</sup>    | 2007 | Uni. H  | 27      | 6-13  | Retro Co   | 44-99              | n          | 1           | n      |
| Lygidakis et al. <sup>39</sup>      | 2009 | Uni. H  | 47      | 6-7   | RCT        | 48                 | n          | 2           | n      |
| Baroni and Marchionni <sup>40</sup> | 2011 | Uni. H  | 30      | 6-9   | Pro Co     | 36                 | n          | 1           | n      |
| Gaardmand et al. <sup>41</sup>      | 2013 | Uni. H  | 33      | 8-18  | Retro Co   | 39                 | n          | 1           | n      |
| Cabasse et al. <sup>42</sup>        | 2015 | Uni. H  | 39      | 9     | Pro Co     | n                  | n          | 1           | n      |
| Fragelli et al. <sup>43</sup>       | 2015 | Uni. H  | 21      | 6-9   | Pro Co     | 12                 | n          | 1           | n      |
| Bekes et al. <sup>44</sup>          | 2016 | Uni. H  | 16      | 8     | Pro Co     | 2                  | n          | 2           | y      |
| Bakkal et al. <sup>45</sup>         | 2017 | Uni. H  | 38      | 7-12  | RCT        | 1                  | n          | 2           | n      |
| de Souza et al. <sup>46</sup>       | 2017 | Uni. H  | 18      | 6-8   | RCT        | 18                 | y          | 2           | n      |
| Fragelli et al. <sup>47</sup>       | 2017 | Uni. H  | 21      | 6-8   | RCT        | 18                 | n          | 2           | y      |
| Sönmez and Saat <sup>48</sup>       | 2017 | Uni. H  | 42      | 8-12  | RCT        | 24                 | n          | 4           | n      |
| Grossi et al. <sup>49</sup>         | 2018 | Uni. H  | 40      | 7-13  | Pro Co     | 12                 | y          | 1           | n      |
| Koleventi et al. <sup>50</sup>      | 2018 | Uni. H  | 14      | 11    | Pro Co     | 6                  | n          | 2           | n      |
| Pasini et al. <sup>51</sup>         | 2018 | Uni. H  | 40      | 8-13  | Pro Co     | 4                  | n/a        | 2           | n/a    |
| <b>Incisors</b>                     |      |         |         |       |            |                    |            |             |        |
| Wong and Winter <sup>52</sup>       | 2002 | Uni. H  | 15      | n/a   | RCT        | 6                  | n          | 1           | n      |
| Özgül et al <sup>53</sup>           | 2013 | Uni. H  | 33      | 7-12  | RCT        | 1                  | n          | 6           | n      |
| Sheoran et al. <sup>54</sup>        | 2014 | Uni. H  | 25      | 11-13 | RCT        | 1                  | n          | 2           | n      |
| Restrepo et al. <sup>55</sup>       | 2016 | Uni. H  | 51      | 9-12  | Pro Co     | 1                  | n          | 2           | y      |
| <b>Only Registered</b>              |      |         |         |       |            |                    |            |             |        |
| DRKS00009760                        | 2016 | Uni. H  | 40      | 6-70  | RCT        | 6                  | y          | 2           | N      |
| DRKS00011882                        | 2017 | Uni. H  | 300     | 7-14  | Pro Co     | 0,5                | Y          | 3           | Y      |

**Abbreviations:** N of part., number of participants; n/a, not available; Pro Co, prospective cohort; Retro Co, retrospective cohort; RCT, randomized control trial; Uni. H, University hospital; Trial reg., trial registration, P Cal., power calculation; n, no; y, yes

**Table 2.** Reported outcomes and outcomes measurement instrument within different outcome categories, ordered according to frequency of use in included studies.

| Outcome category                     | Outcome examples                                                                          | Exemplary outcome measures                                                                                                                                                                          |
|--------------------------------------|-------------------------------------------------------------------------------------------|-----------------------------------------------------------------------------------------------------------------------------------------------------------------------------------------------------|
| Restoration success                  | Clinical performance<br>Restoration quality<br>Survival of tooth and restoration          | Modified US Public Health Service (USPHS) criteria<br>Modified atraumatic restorative treatment (ART) criteria<br>Radiographic evaluation (Bitewings)<br>Number of reinterventions<br>Survival rate |
| Pain and hypersensitivity management | Response to stimulus                                                                      | Schiff Cold Air Sensitivity Scale (SCASS)<br>Questionnaires                                                                                                                                         |
| Aesthetic improvement                | Aesthetic improvement                                                                     | Questionnaires<br>Clinical photography                                                                                                                                                              |
| Mineral gain                         | Mineral gain                                                                              | Laserfluorescence readings<br>Scanning electron microscope (SEM)/<br>Energy Dispersive X-ray Spectrometry (EDX)<br>Quantitative Light-Induced Fluorescence (QLF)                                    |
| Space management                     | Space closure after extraction<br>Need of orthodontic intervention                        | Amount of spontaneous space closure                                                                                                                                                                 |
| Anesthesia effectiveness             | Anesthesia technique<br>Need for local anesthesia                                         | Presence of pain during treatment                                                                                                                                                                   |
| Preventive success                   | Clinical performance<br>Sealant quality<br>Ability to prevent caries and enamel breakdown | Success/ Modified US Public Health Service (USPHS) criteria                                                                                                                                         |
| Efficiency                           | Costs of treatment                                                                        | Placement time<br>Used materials<br>Laboratory costs                                                                                                                                                |
| Quality of life                      | Oral health-related quality of life (OHRQoL)                                              | Self-administered oral health related quality of life (OHRQoL) questionnaires (COHIP G-19, CPQ 8-10, CPQ 11-14)                                                                                     |
| Periodontal health                   | Presence of gingivitis and periodontitis<br>Oral hygiene<br>Subgingival microbiota        | Gingival index (GI)<br>Pocket depth (PD)<br>Turesky plaque index<br>Checkerboard DNA-DNA hybridization                                                                                              |



**Table 3.** Primary and secondary outcomes reported in each study.

| Author (year)                              | Restoration success | Pain and hypersensitivity management | Aesthetic improvement | Mineral gain | Space management | Anesthesia effectiveness | Preventive success | Efficiency | Quality of life | Periodontal health |
|--------------------------------------------|---------------------|--------------------------------------|-----------------------|--------------|------------------|--------------------------|--------------------|------------|-----------------|--------------------|
| Koch and Garcia-Godoy (2000) <sup>33</sup> | x                   |                                      |                       |              |                  |                          |                    |            |                 |                    |
| Wong and Winter (2002) <sup>52</sup>       |                     |                                      | x                     |              |                  |                          |                    |            |                 |                    |
| Lygidakis et al. (2003) <sup>34</sup>      | x                   | ◆                                    |                       |              |                  |                          | ◆                  |            |                 |                    |
| Zagdwon et al. (2003) <sup>35</sup>        | x                   |                                      |                       |              |                  |                          |                    | ◆          |                 |                    |
| Kotsanos et al. (2005) <sup>36</sup>       | x                   |                                      |                       |              | ◆                |                          |                    |            |                 |                    |
| Mejare et al. (2005) <sup>37</sup>         | x                   |                                      |                       |              | ◆                |                          |                    |            |                 |                    |
| Jalevik and Moller (2007) <sup>38</sup>    |                     |                                      |                       |              | x                |                          |                    |            |                 |                    |
| Lygidakis et al. (2009) <sup>39</sup>      | x                   |                                      |                       |              |                  |                          |                    |            |                 |                    |
| Baroni and Marchionni (2011) <sup>40</sup> |                     |                                      |                       | x            |                  |                          |                    |            |                 |                    |
| Gaardmand et al. (2013) <sup>41</sup>      | x                   |                                      |                       |              |                  |                          |                    |            |                 |                    |
| Özgül et al (2013) <sup>53</sup>           |                     | x                                    |                       |              |                  |                          |                    |            |                 |                    |
| Sheoran et al. (2014) <sup>54</sup>        |                     |                                      | x                     |              |                  |                          |                    |            |                 |                    |
| Cabasse et al. (2015) <sup>42</sup>        |                     |                                      |                       |              |                  | x                        |                    |            |                 |                    |
| Fragelli et al. (2015) <sup>43</sup>       | x                   |                                      |                       |              |                  |                          |                    |            |                 |                    |
| Bekes et al. (2016) <sup>44</sup>          |                     | x                                    |                       |              |                  |                          |                    |            |                 |                    |
| DRKS00009760 (2016)                        |                     |                                      | x                     |              |                  |                          |                    |            |                 |                    |
| Restrepo et al. (2016) <sup>55</sup>       |                     |                                      |                       | x            |                  |                          |                    |            |                 |                    |
| Bakkal et al. (2017) <sup>45</sup>         |                     |                                      |                       | x            |                  |                          |                    |            |                 |                    |
| de Souza et al. (2017) <sup>46</sup>       | x                   |                                      |                       |              |                  |                          |                    |            |                 |                    |
| DRKS00011882 (2017)                        |                     |                                      |                       |              |                  |                          |                    |            | x               |                    |
| Fragelli et al. (2017) <sup>47</sup>       | x                   |                                      |                       |              |                  |                          | x                  |            |                 |                    |
| Sönmez and Saat (2017) <sup>48</sup>       | x                   |                                      | ◆                     |              |                  |                          |                    |            |                 |                    |
| Grossi et al. (2018) <sup>49</sup>         | x                   | ◆                                    |                       |              |                  | ◆                        |                    |            |                 |                    |
| Koleventi et al. (2018) <sup>50</sup>      |                     |                                      |                       |              |                  |                          |                    |            |                 | x                  |
| Pasini et al. (2018) <sup>51</sup>         |                     | x                                    |                       |              |                  |                          |                    |            |                 |                    |

x, primary outcome; ◆, secondary outcome

1  
2  
3 **Figure legends:**  
4

5 **Figure 1.** Flow chart of the search.  
6

7 **Figure 2.** Reported outcomes for MIH intervention studies over time. N number of  
8 studies using this outcome in the specific period.  
9  
10

11 **Figure 3.** Networks of different comparisons. Different comparators (nodes) were  
12 compared directly with each other (edges, colored according to target condition; pink:  
13 MIH lesions in incisors, violet: MIH lesions in molars). The node diameter represents  
14 the number of studies involving this comparator, the thickness of the edge the number  
15 of direct comparisons between two comparators. Certain comparators were not  
16 connected to the main network.  
17  
18  
19  
20  
21  
22  
23  
24  
25  
26  
27  
28  
29  
30  
31  
32  
33  
34  
35  
36  
37  
38  
39  
40  
41  
42  
43  
44  
45  
46  
47  
48  
49  
50  
51  
52  
53  
54  
55  
56  
57  
58  
59  
60

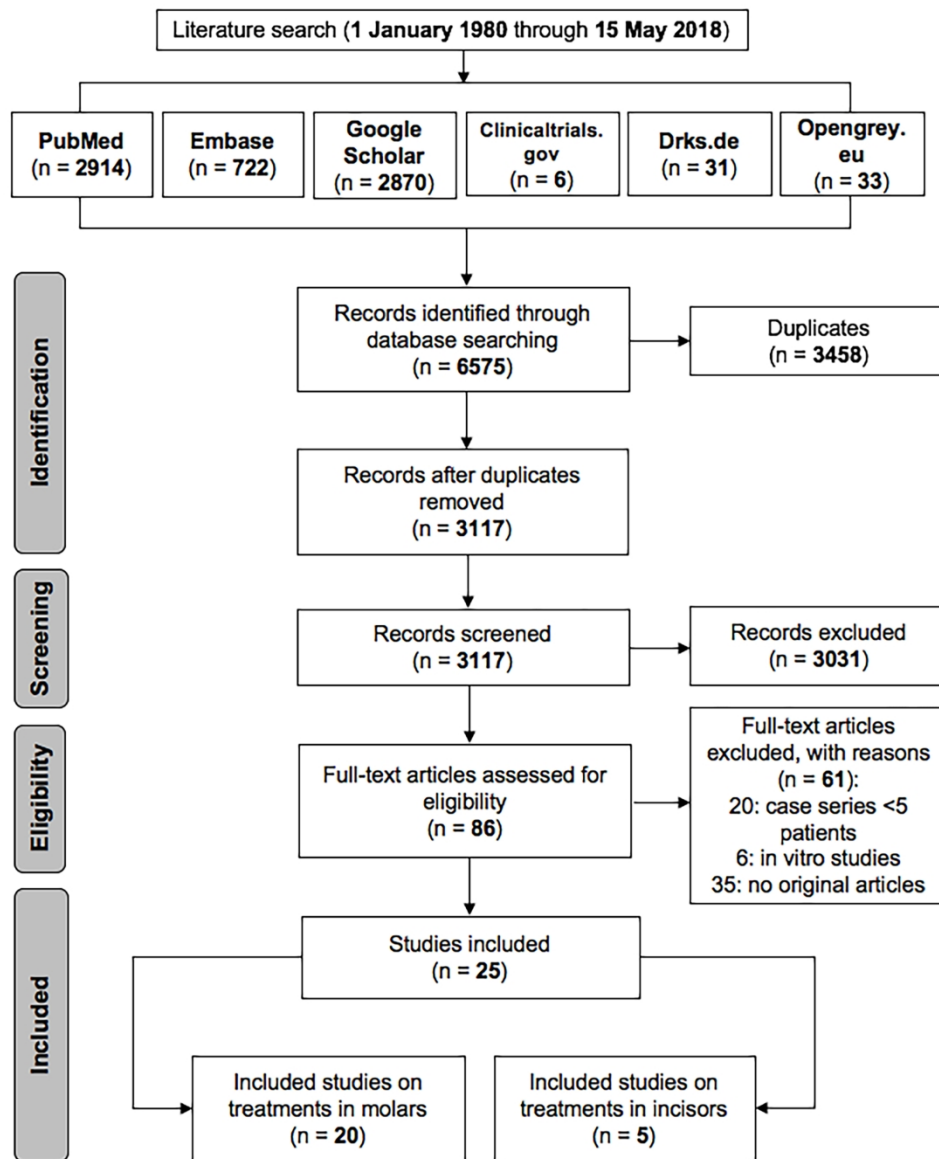

Flow chart of the search.

238x282mm (300 x 300 DPI)

1  
2  
3  
4  
5  
6  
7  
8  
9  
10  
11  
12  
13  
14  
15  
16  
17  
18  
19  
20  
21  
22  
23  
24  
25  
26  
27  
28  
29  
30  
31  
32  
33  
34  
35  
36  
37  
38  
39  
40  
41  
42  
43  
44  
45  
46  
47  
48  
49  
50  
51  
52  
53  
54  
55  
56  
57  
58  
59  
60

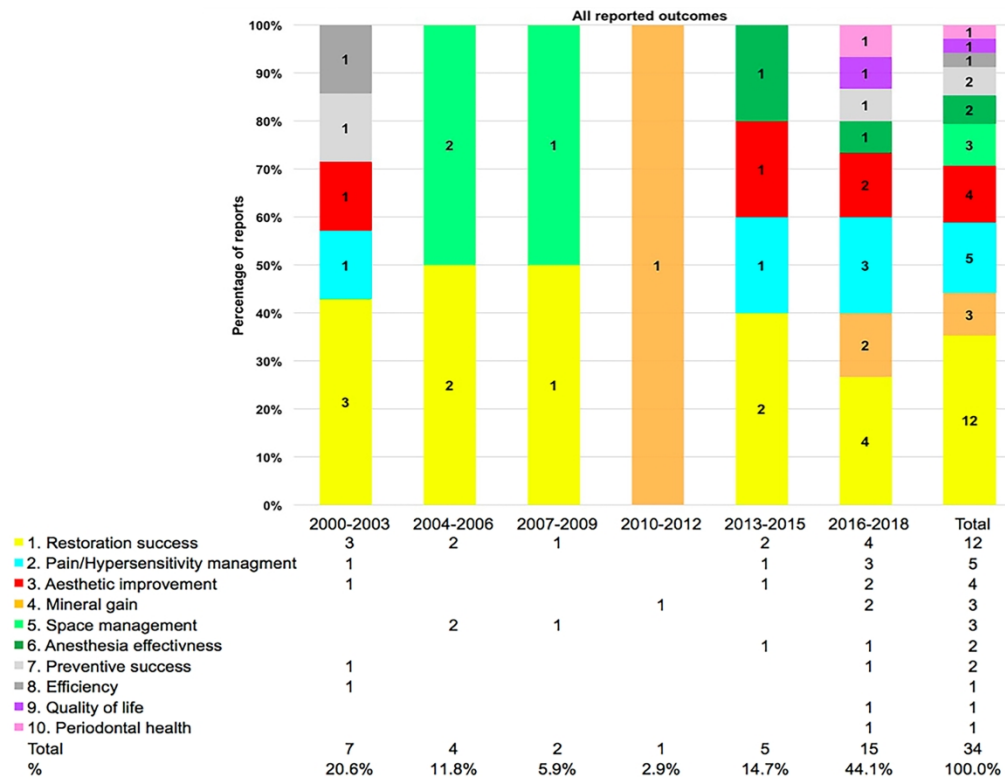

Reported outcomes for MIH intervention studies over time. N number of studies using this outcome in the specific period.

360x280mm (300 x 300 DPI)

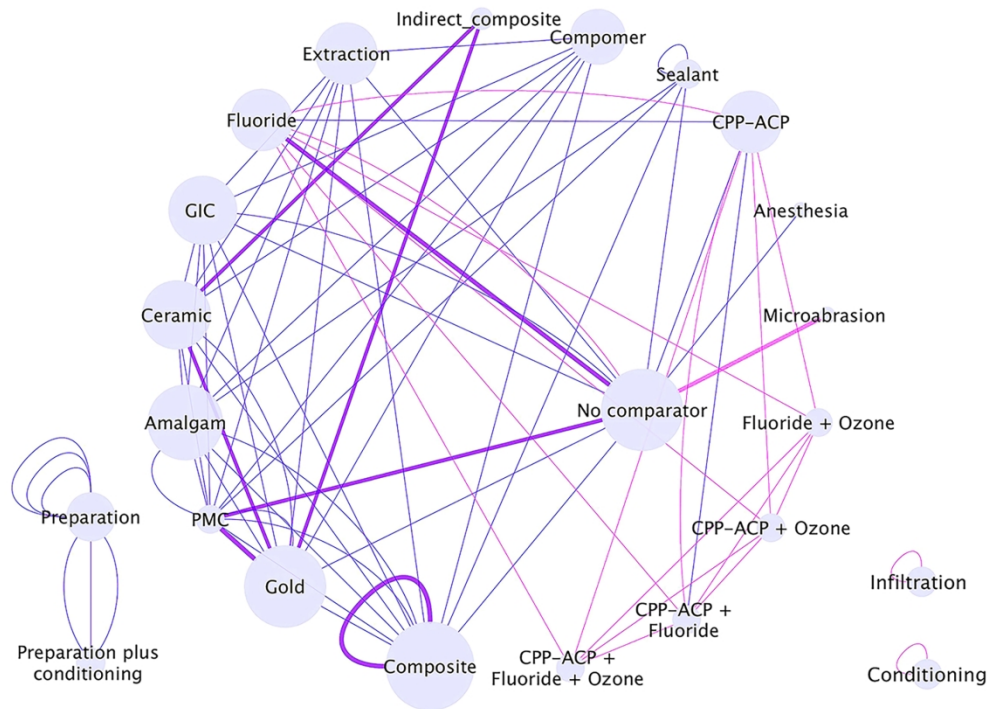

Networks of different comparisons. Different comparators (nodes) were compared directly with each other (edges, colored according to target condition; pink: MIH lesions in incisors, violet: MIH lesions in molars). The node diameter represents the number of studies involving this comparator, the thickness of the edge the number of direct comparisons between two comparators. Certain comparators were not connected to the main network.

209x152mm (300 x 300 DPI)

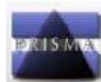

# PRISMA 2009 Checklist

| Section/topic                      | #  | Checklist item                                                                                                                                                                                                                                                                                              | Reported on page # |
|------------------------------------|----|-------------------------------------------------------------------------------------------------------------------------------------------------------------------------------------------------------------------------------------------------------------------------------------------------------------|--------------------|
| <b>TITLE</b>                       |    |                                                                                                                                                                                                                                                                                                             |                    |
| Title                              | 1  | Identify the report as a systematic review, meta-analysis, or both.                                                                                                                                                                                                                                         | 1                  |
| <b>ABSTRACT</b>                    |    |                                                                                                                                                                                                                                                                                                             |                    |
| Structured summary                 | 2  | Provide a structured summary including, as applicable: background; objectives; data sources; study eligibility criteria, participants, and interventions; study appraisal and synthesis methods; results; limitations; conclusions and implications of key findings; systematic review registration number. | 2                  |
| <b>INTRODUCTION</b>                |    |                                                                                                                                                                                                                                                                                                             |                    |
| Rationale                          | 3  | Describe the rationale for the review in the context of what is already known.                                                                                                                                                                                                                              | 4                  |
| Objectives                         | 4  | Provide an explicit statement of questions being addressed with reference to participants, interventions, comparisons, outcomes, and study design (PICOS).                                                                                                                                                  | 4                  |
| <b>METHODS</b>                     |    |                                                                                                                                                                                                                                                                                                             |                    |
| Protocol and registration          | 5  | Indicate if a review protocol exists, if and where it can be accessed (e.g., Web address), and, if available, provide registration information including registration number.                                                                                                                               | 4-6                |
| Eligibility criteria               | 6  | Specify study characteristics (e.g., PICOS, length of follow-up) and report characteristics (e.g., years considered, language, publication status) used as criteria for eligibility, giving rationale.                                                                                                      | 5                  |
| Information sources                | 7  | Describe all information sources (e.g., databases with dates of coverage, contact with study authors to identify additional studies) in the search and date last searched.                                                                                                                                  | 4                  |
| Search                             | 8  | Present full electronic search strategy for at least one database, including any limits used, such that it could be repeated.                                                                                                                                                                               | 4                  |
| Study selection                    | 9  | State the process for selecting studies (i.e., screening, eligibility, included in systematic review, and, if applicable, included in the meta-analysis).                                                                                                                                                   | 5                  |
| Data collection process            | 10 | Describe method of data extraction from reports (e.g., piloted forms, independently, in duplicate) and any processes for obtaining and confirming data from investigators.                                                                                                                                  | 4-5                |
| Data items                         | 11 | List and define all variables for which data were sought (e.g., PICOS, funding sources) and any assumptions and simplifications made.                                                                                                                                                                       | 5                  |
| Risk of bias in individual studies | 12 | Describe methods used for assessing risk of bias of individual studies (including specification of whether this was done at the study or outcome level), and how this information is to be used in any data synthesis.                                                                                      | 5                  |
| Summary measures                   | 13 | State the principal summary measures (e.g., risk ratio, difference in means).                                                                                                                                                                                                                               | 7                  |
| Synthesis of results               | 14 | Describe the methods of handling data and combining results of studies, if done, including measures of consistency (e.g., $I^2$ ) for each meta-analysis.                                                                                                                                                   | 5-6                |

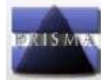

# PRISMA 2009 Checklist

| Section/topic                 | #  | Checklist item                                                                                                                                                                                           | Reported on page # |
|-------------------------------|----|----------------------------------------------------------------------------------------------------------------------------------------------------------------------------------------------------------|--------------------|
| Risk of bias across studies   | 15 | Specify any assessment of risk of bias that may affect the cumulative evidence (e.g., publication bias, selective reporting within studies).                                                             | -                  |
| Additional analyses           | 16 | Describe methods of additional analyses (e.g., sensitivity or subgroup analyses, meta-regression), if done, indicating which were pre-specified.                                                         | 7                  |
| <b>RESULTS</b>                |    |                                                                                                                                                                                                          |                    |
| Study selection               | 17 | Give numbers of studies screened, assessed for eligibility, and included in the review, with reasons for exclusions at each stage, ideally with a flow diagram.                                          | 6                  |
| Study characteristics         | 18 | For each study, present characteristics for which data were extracted (e.g., study size, PICOS, follow-up period) and provide the citations.                                                             | 7                  |
| Risk of bias within studies   | 19 | Present data on risk of bias of each study and, if available, any outcome level assessment (see item 12).                                                                                                | 7                  |
| Results of individual studies | 20 | For all outcomes considered (benefits or harms), present, for each study: (a) simple summary data for each intervention group (b) effect estimates and confidence intervals, ideally with a forest plot. | -                  |
| Synthesis of results          | 21 | Present results of each meta-analysis done, including confidence intervals and measures of consistency.                                                                                                  | -                  |
| Risk of bias across studies   | 22 | Present results of any assessment of risk of bias across studies (see Item 15).                                                                                                                          | -                  |
| Additional analysis           | 23 | Give results of additional analyses, if done (e.g., sensitivity or subgroup analyses, meta-regression [see Item 16]).                                                                                    | 8                  |
| <b>DISCUSSION</b>             |    |                                                                                                                                                                                                          |                    |
| Summary of evidence           | 24 | Summarize the main findings including the strength of evidence for each main outcome; consider their relevance to key groups (e.g., healthcare providers, users, and policy makers).                     | 8-10               |
| Limitations                   | 25 | Discuss limitations at study and outcome level (e.g., risk of bias), and at review-level (e.g., incomplete retrieval of identified research, reporting bias).                                            | 9                  |
| Conclusions                   | 26 | Provide a general interpretation of the results in the context of other evidence, and implications for future research.                                                                                  | -                  |
| <b>FUNDING</b>                |    |                                                                                                                                                                                                          |                    |
| Funding                       | 27 | Describe sources of funding for the systematic review and other support (e.g., supply of data); role of funders for the systematic review.                                                               | 11                 |

From: Moher D, Liberati A, Tetzlaff J, Altman DG, The PRISMA Group (2009). Preferred Reporting Items for Systematic Reviews and Meta-Analyses: The PRISMA Statement. PLoS Med 6(6): e1000097. doi:10.1371/journal.pmed1000097

For more information, visit: [www.prisma-statement.org](http://www.prisma-statement.org).

# BMJ Open

## Outcome and comparator choice in Molar Incisor Hypomineralization (MIH) Intervention Studies: A Systematic Review and Social Network Analysis

|                                 |                                                                                                                                                                                                                                                                                                                                                                                                                                                                                 |
|---------------------------------|---------------------------------------------------------------------------------------------------------------------------------------------------------------------------------------------------------------------------------------------------------------------------------------------------------------------------------------------------------------------------------------------------------------------------------------------------------------------------------|
| Journal:                        | <i>BMJ Open</i>                                                                                                                                                                                                                                                                                                                                                                                                                                                                 |
| Manuscript ID                   | bmjopen-2018-028352.R1                                                                                                                                                                                                                                                                                                                                                                                                                                                          |
| Article Type:                   | Research                                                                                                                                                                                                                                                                                                                                                                                                                                                                        |
| Date Submitted by the Author:   | 17-Apr-2019                                                                                                                                                                                                                                                                                                                                                                                                                                                                     |
| Complete List of Authors:       | Elhennawy, Karim; Charite Universitätsmedizin Berlin, Department of Orthodontics, Dentofacial Orthopedics and Pedodontics<br>Krois, Joachim; Charite Universitätsmedizin Berlin, Department of Operative and Preventive Dentistry<br>Jost-Brinkmann, Paul-Georg; Charite Medical Faculty Berlin, Department of Orthodontics, Dentofacial Orthopedics and Pedodontics<br>Schwendicke, Falk; Charite Universitätsmedizin Berlin, Department of Operative and Preventive Dentistry |
| <b>Primary Subject Heading</b>: | Dentistry and oral medicine                                                                                                                                                                                                                                                                                                                                                                                                                                                     |
| Secondary Subject Heading:      | Dentistry and oral medicine, Evidence based practice, Health services research, Research methods                                                                                                                                                                                                                                                                                                                                                                                |
| Keywords:                       | Systematic review, Molar incisor hypomineralization, core outcome set, MIH, prevention, management                                                                                                                                                                                                                                                                                                                                                                              |
|                                 |                                                                                                                                                                                                                                                                                                                                                                                                                                                                                 |

SCHOLARONE™  
Manuscripts



1  
2  
3 **Outcome and comparator choice in Molar Incisor Hypomineralization (MIH)**  
4 **Intervention Studies: A Systematic Review and Social Network Analysis**  
5

6 Karim Elhennawy<sup>1, 2\*</sup>, Joachim Krois<sup>2</sup>, Paul-Georg Jost-Brinkmann<sup>1</sup>, Falk  
7 Schwendicke<sup>2</sup>  
8

9  
10 <sup>1</sup> Centre for Dental and Craniofacial Sciences, Department of Orthodontics,  
11 Dentofacial Orthopedics and Pedodontics, Charité - Universitätsmedizin Berlin,  
12 Germany, Aßmannshauer Str. 4-6, 14197 Berlin, Germany  
13

14 <sup>2</sup> Centre for Dental and Craniofacial Sciences, Department of Operative and  
15 Preventive Dentistry, Charité - Universitätsmedizin Berlin, Germany, Aßmannshauer  
16 Str. 4-6, 14197 Berlin, Germany  
17

18 **\* Corresponding author:**  
19

20 Karim Elhennawy  
21

22 Charité Universitätsmedizin, Centre for Dental and Craniofacial Sciences  
23

24 Department of Orthodontics, Dentofacial Orthopedics and Pedodontics and  
25 Department of Operative and Preventive Dentistry  
26

27 Aßmannshauer Str. 4-6  
28

29 14197 Berlin, Germany  
30

31 **Phone:** +49 30 450 562594  
32

33 **Fax:** +49 30 450 562952  
34

35 **E-Mail:** [Karim.elhennawy@charite.de](mailto:Karim.elhennawy@charite.de)  
36  
37

38 **Keywords**  
39

40 Systematic review, molar incisor hypomineralization, core outcome set, outcomes,  
41 MIH, prevention, management, intervention  
42  
43

44  
45 **Tables:** 3  
46

47 **Figures:** 4  
48  
49  
50  
51  
52  
53  
54  
55  
56  
57  
58  
59  
60

## Abstract

**Objectives:** Outcome and comparator choice strongly determine the validity and implementation of clinical trial results. We aimed to assess outcome and comparator choice in intervention studies on Molar Incisor Hypomineralization (MIH) using systematic review and social network analysis (SNA).

**Design and data sources:** Medline, Embase, Cochrane Central, Google Scholar, opengrey.eu as well as DRKS.de and Clinicaltrials.gov were searched for MIH intervention studies. The search covered the period from 1980-2019.

**Eligibility criteria:** Clinical single-/multi-arm, controlled/uncontrolled studies reporting on the management of MIH were included. Reported outcomes and comparators were extracted and categorized. SNA was used to evaluate comparator choice and the resulting trial networks.

**Data extraction:** Of the 7979 identified records, 100 were evaluated in full-text and 35 studies (17 randomized controlled trials, 14 prospective and 4 retrospective cohort studies) were included.

**Results:** In total, 2124 patients with a mean age of 11 years (min/max 6/70 years) were included. Outcomes fell in one of 11 different outcome categories: Restoration success, Aesthetic improvement, Pain/ hypersensitivity/ discomfort, Mineral gain, Space management, Anesthesia effectiveness, Preventive success, Efficiency, Quality of life, Gingival and periodontal health and Patient satisfaction. Comparators were mainly restorative interventions (17 studies), remineralization (3), treatment of hypersensitivity (10), esthetic interventions (5), and orthodontic interventions (3). Two highly clustered comparator networks emerged; many interventions were not robustly linked to these networks.

**Conclusions:** MIH intervention studies recorded both clinically- and patient-centered outcomes. Core Outcome Set (COS) development should consider these and supplement them with outcomes on, for example, applicability. The high number of compared interventions tested in only few studies and our SNA results implicate that the current evidence may not be robust.

### Strengths and limitations of this study

- Molar incisor hypomineralization (MIH) is a frequent condition. No core outcome set on MIH exists.
- Outcomes and comparators for MIH studies were assessed using a systematic review.
- A network analysis was performed to evaluate the robustness of comparisons.
- The findings of this study will aid in core outcomes definition.
- The available body of evidence is limited and likely not robust.

For peer review only

## Introduction

There is increasing interest into the internal and external validity of clinical studies, as indicated, for example, by their risk of bias<sup>1 2</sup> or their reporting quality<sup>3</sup>. Two aspects which only recently came into the focus, but impact on validity are (1) outcome and (2) comparator choice.

So far, most clinical researchers chose the outcomes based on their understanding of what was relevant or not; the involvement of further stakeholders into outcome choice was seldom considered. This impacts on the relevance of study findings and may limit their applicability. Also, researchers usually collected a range of outcomes, without necessarily reporting all of them later on (selective reporting); mainly as data on outcomes with unwanted findings (which may nevertheless be relevant) can be omitted. The chosen outcomes and outcome measures may further suffer from limited comparability across studies, decreasing the chance to make the best use of clinical studies by synthesizing them. Outcome choice is thus relevant for study validity, applicability, and relevance, and implementation into practice<sup>4-6</sup>.

Comparator choice impacts on the overall usefulness and validity of evidence<sup>7</sup>. Again, usually, most clinical researchers choose the comparators themselves, without necessarily consulting patients or further stakeholders such as insurers, regulators etc. Comparators relevant to patients, for example, may hence not be evaluated, and certain comparators may be over-proportionally employed<sup>8-10</sup>. The resulting gaps in the evidence may mean important informations on possibly useful comparators are unavailable. Also, comparisons against placebo or no intervention (in single arm studies) or less effective options (so called straw men) can lead to overestimation of effectiveness<sup>9-11</sup>. Repeated chain-linked comparisons against less-than-optimal standards was found to significantly distort the totality of evidence<sup>9-11</sup>. Comparator choice is relevant to make clinical research in a specific field useable, applicable, and informative.

The present study assessed outcome and comparator choice in intervention studies on Molar Incisor Hypomineralisation (MIH), a highly prevalent dental developmental disorder with a significant burden for patients and high treatment needs<sup>12</sup>. MIH is characterized by demarcated creamy-white, yellowish-brown or brown lesions with or without posteruptive enamel breakdown and hypersensitivity, affecting the permanent

1  
2  
3 molars with or without additional affection of the incisors <sup>13-15</sup>. The severity of the  
4 lesions, the symptomatology of the affected tooth as well as the patient's dental age,  
5 caries risk and expectations need to be considered in the management of MIH <sup>15</sup>.  
6 Dentists oftentimes need to employ different treatment strategies when dealing with  
7 MIH patients, including restoring cavities, alleviating pain or improving aesthetics <sup>16</sup>,  
8 <sup>17</sup>. Given the broad spectrum of clinical presentations, individual needs and available  
9 treatment modalities, managing MIH is challenging for most practitioners <sup>13-15</sup>.

10  
11  
12 Assessing the outcome and comparator choice in MIH intervention studies seems  
13 warranted. Such assessment is further useful to inform the development of a Core  
14 Outcome Set (COS) for MIH management and prevention studies. COS are a  
15 minimum set of outcomes which have been agreed in a systematic consensus process  
16 by a diverse group of stakeholders (patients, dentists, researchers, insurance  
17 companies etc). COS overcome the problem of a possibly limited relevance of chosen  
18 outcomes, the risk of selective reporting and the lack of synthesizability of study  
19 findings <sup>18</sup>. A range of COS development initiatives are currently underway in dentistry  
20 <sup>19-23</sup>.

21  
22  
23 We aimed to review the outcomes used in MIH intervention studies to inform the  
24 development of a COS on MIH. We further aimed to assess the comparators used in  
25 these studies and to analyze the resulting study network. This was done using social  
26 network analysis (SNA), a method for evaluating the relationships between actors in  
27 a network <sup>8</sup>, which has been introduced to dentistry recently <sup>24</sup>. As secondary aim, we  
28 evaluated if studies clearly indicated their primary outcome, if studies used a sample  
29 size estimation based on this outcome, and if studies were registered a priori, as  
30 should be expected.

## 31 32 33 34 35 36 37 38 39 40 41 42 43 44 45 46 47 48 **Methods**

49  
50 This review was registered on the Core Outcome Measures in Effectiveness Trials  
51 (COMET) initiative website <sup>1</sup>. In parts, it builds on a previously published review on  
52 MIH management <sup>25</sup>.

## 53 54 55 56 57 58 *Search strategy*

1  
2  
3 The following search was adapted for each database:  
4

5 (treatment OR management OR prevention) AND (molar incisor hypomineralisation  
6 OR molar incisor hypomineralization OR mih).  
7  
8

9 Searches were developed and run individually for Medline, Embase, Cochrane  
10 Central, Google Scholar, opengrey.eu as well as DRKS and Clinicaltrials.gov and  
11 cross references were performed without any language restrictions. The search  
12 covered the period from 01.01.1980 to 03.04.2019 (Fig. 1).  
13  
14  
15  
16

### 17 18 19 *Data collection*

20  
21 Inclusion criteria: We included all types of clinical studies (retrospective or prospective,  
22 controlled trials or cohort studies) in patients diagnosed with MIH. Note that studies  
23 conducted before 2001 on the condition will not have employed the term “MIH”, and  
24 may have been missed by our search. This, however, was accepted, as without a clear  
25 case definition, other conditions may have been captured by these studies too, without  
26 being able to separate conditions post hoc. Studies reported on prevention and/or  
27 management interventions for MIH teeth. There were no restrictions on setting, time  
28 of follow-up, or patients’ age. Case reports or case series with a sample size of < 10  
29 participants were excluded. No language restriction was set; studies in languages  
30 other than English, German or Arabic (if present) were translated by native speakers.  
31 Selection process: Two authors (FS, KE) screened titles independently and compared  
32 their findings. In case of disagreement, titles were included to obtain full-texts. Full-  
33 texts were assessed independently after de-duplication. In cases of disagreement,  
34 studies were included after consensus was reached through discussion.  
35  
36  
37  
38  
39  
40  
41  
42  
43  
44

45  
46 Data extraction: The following data was extracted duplicatively and independently by  
47 two authors (KE and FS) following calibration using a pilot database:  
48

- 49 • Study details (author name, title, journal, year of publication);
  - 50 • Study characteristics;
    - 51 ○ Study setting (primary or secondary care)
    - 52 ○ Number and age of participants
    - 53 ○ Study type (controlled or uncontrolled, pro- or retrospective)
    - 54 ○ Target condition (MIH lesions on molars, incisors, or both)
    - 55 ○ Number of study arms
- 56  
57  
58  
59  
60

- Interventions compared
- Follow-up period
- Outcomes assessed, separated for primary and secondary outcome(s).  
An outcome was considered a primary outcome if it was stated as such, or where the report clearly focused on one outcome. If no primary outcome was identifiable or multiple outcomes were reported, these were considered secondary outcomes.
- Outcome measures
  - Sample size estimation (yes/no)
  - Trial registration (yes/no).

### *Data synthesis*

A list of outcomes was compiled and outcomes with different verbatim terms but similar meanings gathered using a single agreed term. Outcomes were grouped with in outcome categories; these were refined through group discussion before all outcomes were categorized using the final agreed terms. The final list of outcome categories comprised 11 items; Restoration success, Aesthetic improvement, Pain and hypersensitivity management, Mineral gain, Space management, Anesthesia effectiveness, Preventive success, Efficiency, Quality of life, Gingival and Periodontal health, and Patient satisfaction. The use of different outcome categories was analyzed via descriptive statistics. Exemplary outcomes and outcome measures were allocated to one of these outcome categories by discussion and agreement of two authors (KE and FS). Where there was disagreement, consensus was achieved through discussion with all authors.

A list of comparators was compiled and comparators were grouped into agreed categories. The granularity of these categories allowed to capture specific comparators (like “glass ionomer cement restoration”) while grouping similar comparators in the same category (e.g. different cement brands). Comparator choice was analyzed via SNA. In SNA, nodes (termed ‘vertices’) are formed by comparators, and are connected by edges (comparisons made within the same trial). In a graphical analysis, the node diameter represents the number of comparator arms forming the node and thickness of edges represents the number of direct comparisons. We

1  
2  
3 performed separate analyses (and graphic representations) for studies on MIH in  
4 molars versus incisors. Statistical analysis included the assessment of the degree  
5 (average number of comparators per node) and the clustering coefficient (values of  
6 one indicate that all possible connections were made, while values of 0 indicate that  
7 only the minimum number of connections were made) <sup>26-28</sup>. Statistical analysis was  
8 only performed for the main network in each sub-analysis (molars; incisors). The  
9 Python package NetworkX was used.  
10  
11  
12  
13  
14  
15  
16  
17

### 18 *Patient and public involvement*

19 Patients were not involved in this study at this point, but will be during the core  
20 outcomes definition.  
21  
22  
23

## 24 **Results**

### 25 *Included studies*

26 The database search yielded 7979 records; 4106 remained after de-duplication. There  
27 were 100 potentially relevant articles and the full texts of all these 100 articles were  
28 located (100% retrieval rate); 35 met the inclusion criteria and were included (Fig. 1).  
29  
30  
31  
32  
33  
34  
35  
36  
37

### 38 *Characteristics of included trials*

39 Of the 35 included studies, all (100%) were conducted in a secondary care setting  
40 (hospital or university). The total number of participants was 2124; per study a mean  
41 of 60 (range 12 – 300) participants were included. Only children (mean age < 12 years)  
42 were included in 33 included reports (94%). Only one (3%) study reported on adults  
43 (mean age 33 years). In two other publications (6%) it was not possible to determine  
44 the age of the participants. There were 10 (29%) one-arm studies, 18 (51%) two-arm  
45 studies, 3 (9%) three-arm studies, and 4 (11%) multi-arm studies. Further details on  
46 the included studies can be found in Table 1.  
47  
48  
49  
50  
51  
52  
53  
54  
55  
56  
57  
58  
59  
60



### *Outcome choice*

In total, 11 outcome categories were deduced from the included studies (Fig. 2, Table 2). The most frequent specific categories were “Restoration success” and “Pain/discomfort/ hypersensitivity”; with 17 (49%) and 12 (34%) studies reporting them, respectively. The next most common were “Quality of life” and “Efficiency” (each 5 studies, 14%); “Aesthetic improvement” and “Preventive success” (4 studies, 11%); “Mineral gain”, “Space management” and “Anesthesia effectiveness” (each 3 studies, 9%). The least common ones were “Patient satisfaction” and “Gingival and periodontal health” (each 2 studies, or 6%). Outcome categories that have increased in use (from 2000-2009 to 2010-2018) included “Aesthetic improvement”, “Mineral gain”, “Efficiency”, and “Gingival and periodontal health”.

### *Findings for molars*

For molars, 10 outcome categories were identified from the included studies. Those were: “Restoration success” with a total of 17/28 studies reporting on it (15/17 as primary outcome and 2/17 as secondary outcome); “Pain/discomfort/hypersensitivity” with a total of 12/28 studies reporting on it (4/12 as primary outcome and 8/11 as secondary outcome); “Quality of life” with a total of 5/28 studies reporting on it (2/5 as primary outcome and 3/5 as secondary outcome); “Efficiency” with a total of 5/28 studies reporting on it (1/5 as primary outcome and 4/5 as secondary outcome); “Preventive success” with a total of 4/28 studies reporting on it (3/4 as primary outcome and 1/4 as secondary outcome); “Anesthesia effectiveness” with a total of 3/28 studies reporting on it (2/3 as primary outcome and 1/3 as secondary outcome); “Space management” with a total of 3/28 studies reporting on it (1/3 as primary outcome and 2/3 as secondary outcome); “Mineral gain” with a total of 2/28 studies reporting on it (all as primary outcome); “Gingival and periodontal health” with a total of 2/28 studies reporting on it (1/2 as primary outcome and 1/2 as secondary outcome); “Patient satisfaction” with a total of 2/28 studies reporting on it (all as secondary outcome).

### *Findings for incisors*

1  
2  
3 For incisors, only four outcome categories were identified from the included studies.  
4 Those were: “Aesthetic improvement” with a total of 4/7 studies reporting on it (all as  
5 primary outcome); “Pain/discomfort/hypersensitivity” with a total of 1/7 study reporting  
6 on it (as primary outcome); “Quality of life” with a total of 1/7 study reporting on it (as  
7 primary outcome); “Mineral gain” with a total of 1/7 study reporting on it (as primary  
8 outcome).  
9  
10  
11  
12  
13  
14  
15

### 16 *Comparator choice*

17  
18 Two separate analyses on comparator choice were performed; one for studies on  
19 molars and one on incisors. In both groups, a loosely connected main network and a  
20 number of further, unconnected networks or comparators were present, indicating  
21 poor connectivity between comparators (Figs. 3 and 4). Certain comparators were  
22 more frequently chosen than others.  
23  
24  
25  
26

27 In molars (Fig. 3), many studies compared different restorative strategies, for example  
28 composite (with different brands also tested against each other), metal, ceramic or  
29 cement restorations. Further comparisons, non-connected to this main (restorative)  
30 network, involved caries preventive interventions, management of hypersensitivity,  
31 and cavity preparation and condition techniques. The mean degree of the main,  
32 restorative network was 5.9, with a density of 0.49. The cluster coefficient (which  
33 ranges from 0 – no clustering – to 1 – maximum clustering) was 0.76, indicating that  
34 there was significant clustering, with certain comparators being compared with each  
35 other (in “cliques”), while other possible comparisons (against comparators outside of  
36 these cliques) not having been made.  
37  
38  
39  
40  
41  
42  
43  
44

45 In incisors (Fig. 4), a main network, comparing different remineralization strategies,  
46 emerged, with two further networks and two further, non-connected comparators on  
47 aesthetic management of MIH. The mean degree of the main (remineralization)  
48 network was 5, with a density of 1.0. The cluster coefficient was 1.0, indicating that  
49 there were “cliques” of comparators present, with comparators being mainly compared  
50 within and not across these cliques.  
51  
52  
53  
54  
55  
56  
57  
58  
59  
60

### *Primary outcome and sample size calculation*

Primary outcomes could be identified in all 35 (100%) reports (Table 3). Throughout all years (2000 to 2019), “Restoration success” was the most frequently assessed primary outcome (17/35). Information on sample size calculation was provided in 7 (20%) reports, all but one being published between 2016 and 2019. Of these 7 reports, 5 (71%) related this calculation to the primary outcome.

### *Trial registration reporting*

Only 10 (29%) of all articles reported a trial registration<sup>29</sup>. In the 10 years following the publication of the first CONSORT statement (2001-2010), not a single report included a trial registration. Following the publication of the second CONSORT statement (2011-2019), this increased to 29%.

## **Discussion**

This systematic review assessed outcome and comparator choice in MIH intervention studies, and their change over time. We found that studies recorded a large range of outcomes, especially when considering the limited number of studies overall, and that the diversity of these outcomes is increasing. This is reassuring, and the findings of this review are helpful to develop a COS. We also found that despite the low number of studies available, a large range of different interventions were tested, which led to the occurrence of segregated networks. Resulting from this clustering and the fact that most interventions were not well compared against alternatives, the current body of evidence on MIH interventions is likely not robust.

The outcomes used in MIH intervention studies focused on two main areas; restoration success (measured via the USPHS criteria or similar tools) and pain/ discomfort/ hypersensitivity (measured via scales like the Visual analogue scale or the Schiff Cold Air Sensitivity Scale). Combined, these two areas accounted for the majority of primary and all reported outcomes. Both, restoring MIH teeth and managing pain can be assumed to be the major difficulties dentists face when treating MIH. Research has shown that MIH-affected children receive and need more dental treatment compared to unaffected children<sup>30-35</sup>. Also already restored MIH-molars remain within short re-

1  
2  
3 treatment cycles <sup>30</sup>. The porous nature of MIH enamel and the presence of post  
4 eruptive enamel breakdown leads to the presence of hypersensitivity and pain, which  
5 are often the patients' chief complaint and affect their quality of life. It also increases  
6 the risk of dental fear and anxiety <sup>15 36-38</sup>. Overall, the focus on how to best restore  
7 these teeth and alleviate pain seems justified.  
8  
9

10  
11 Nevertheless the use of other outcome categories like quality of life or efficiency  
12 appears to be growing, reflecting an ongoing shift to patient-centered care (and  
13 research) and the increasing relevance of health economics in today's resource-  
14 limited healthcare settings. We will, in the next stage of our COS development,  
15 suggest these outcomes to be included in the COS on MIH intervention studies, and  
16 will seek stakeholder consensus on their inclusion (or not).  
17  
18  
19  
20  
21

22  
23 We also investigated further outcome-related aspects in the included studies. For  
24 example, trial registration, one of the recommendations of the CONSORT statement  
25 <sup>39 40</sup>, was found in only 10 studies (and even very recent studies did not commonly  
26 report on this). While such registration may be seen as a prerogative of controlled  
27 trials, also single-arm prospective trials should clearly state what is to be investigated  
28 using which methods and tools in what population before commencing the study. This  
29 does not seem to be the case. Registration would help to reduce selective outcome  
30 reporting and could also assist in improving reporting standards (and general  
31 methodology) in MIH intervention studies.  
32  
33  
34  
35  
36  
37

38  
39 Also, of the 35 reports, only 7 studies reported a sample size calculation, and of these,  
40 only 5 related this to the primary outcome. Again, while such calculations are mainly  
41 demanded for controlled prospective trials, researchers should have a rational basis  
42 for calculating the number of participants needed in any study (regardless of its  
43 design), be it to ascertain that differences between the interventions can be detected  
44 with a planned level of statistical confidence or be it to reduce statistical noise  
45 (allowing somewhat firm conclusions). Sample size calculation is a key  
46 recommendation in the CONSORT statement, published in 2001 <sup>40</sup> and revised in  
47 2010 <sup>39</sup>. It was promising to find that, since this revision, more publications reported  
48 on a sample size calculation (while the overall number remained low).  
49  
50  
51  
52  
53  
54  
55

56  
57 Our network analysis found that most comparisons in MIH trials included few, favoured  
58 comparators; many possible comparisons were never made, and some comparators  
59 were not at all compared against alternatives. Moreover, and understandable,  
60

1  
2  
3 comparators focusing on specific indications (managing pain, restoring cavities,  
4 improving aesthetics) were connected within, not between these indications. Overall,  
5 the information emerging from such poorly connected networks with regards to the  
6 relative efficacy of the interventions (answering the question of which intervention is  
7 most suited for a specific therapeutic goal) is likely not robust. The small sample sizes  
8 in most studies further add to the limited robustness of the existing evidence. Overall,  
9 the relatively “young” field of MIH research has so far not accrued sufficiently robust  
10 data which allows strong recommendations for clinicians.  
11  
12

13 This study has a number of limitations. First, the effort to improve COS methodology  
14 is ongoing, and our review used only one of several available strategies suggested for  
15 COS developers. For example, it seems that to reach saturation on outcomes and  
16 outcome categories, it may not be necessary to search multiple databases <sup>41</sup>, while  
17 we did so, also as this review was an update of a previous one and we aimed to apply  
18 the same methodology. Second, developing outcome categories and assigning  
19 specific verbatim outcomes to these categories is challenging <sup>21</sup>, often as outcomes  
20 are either inter-related or composites, capturing different outcome categories <sup>42</sup>. While  
21 there is no acknowledged MIH outcome classification system, it is clear that alternative  
22 classifications may have resulted in changes to the granularity and focus of the results.  
23 Third, researchers tend to publish multiple reports from the same clinical trial <sup>43</sup>. This  
24 can be necessary to report on the dataset at different time points, or to report on  
25 multiple analyses. Data is then divided and spread across multiple publications, which  
26 makes linking or summarizing these articles very difficult. We assume to have  
27 captured all articles given the field being limited. Last, in order to limit selective  
28 outcome bias and in the attempt of including the most recent trials, registries were  
29 searched in our study, too. This however, has its limitations, since there are often  
30 incomplete or unclear registrations, and we were only limitedly able to extract data.  
31  
32  
33  
34  
35  
36  
37  
38  
39  
40  
41  
42  
43  
44  
45  
46  
47  
48  
49  
50  
51

## 52 **Conclusions**

53  
54 Outcomes reported in interventional trials for the management and prevention of MIH  
55 focused on the performance of restorative materials or and the management of pain  
56 and hypersensitivity associated with MIH-affected teeth. Outcomes related to oral-  
57 health related quality of life and economics have grown in use and are likely to be  
58  
59  
60

1  
2  
3 important in the future. Patient-reported or patient-centered outcomes were rarely  
4 reported. COS development should include these and may supplement them with new  
5 outcomes, e.g. on applicability. The high number of compared interventions tested in  
6 only few studies and our SNA results implicate that current evidence may not be  
7 robust.  
8  
9  
10  
11  
12  
13  
14  
15  
16  
17  
18  
19  
20  
21  
22  
23  
24  
25  
26  
27  
28  
29  
30  
31  
32  
33  
34  
35  
36  
37  
38  
39  
40  
41  
42  
43  
44  
45  
46  
47  
48  
49  
50  
51  
52  
53  
54  
55  
56  
57  
58  
59  
60

For peer review only

**Trial status (Registration):**

COMET initiative online <http://www.comet-initiative.org/studies/details/1155> <sup>1</sup>

**Competing interests**

The authors declare no conflict of interest.

**Funding**

No funding was acquired.

**Ethical approval**

Not applicable.

**Author contributions**

The study was conceived by KE and FS. KE and JK analyzed, interpreted the data.

KE, P-G J-B and FS wrote the manuscript. All authors read and approved the

manuscript.

**Transparency declaration**

The lead author\* affirms that this manuscript is an honest, accurate, and transparent account of the study being reported; that no important aspects of the study have been omitted; and that any discrepancies from the study as planned (and, if relevant, registered) have been explained.

**Data availability statement**

All data relevant to the study are included in the article or uploaded as supplementary information.

## References

1. COMET. comet - initiative. org, Accessed 23 Jan 2017.
2. Higgins JPT, Altman DG, Gøtzsche PC, et al. The Cochrane Collaboration's tool for assessing risk of bias in randomised trials. *BMJ* 2011;343:d5928.
3. Schulz K, Altman DG, Moher D, et al. CONSORT 2010 Statement: updated guidelines for reporting parallel group randomised trials. *BMC Medicine* 2010;8(1):18.
4. Prinsen CA, Vohra S, Rose MR, et al. Core Outcome Measures in Effectiveness Trials (COMET) initiative: protocol for an international Delphi study to achieve consensus on how to select outcome measurement instruments for outcomes included in a 'core outcome set'. *Trials* 2014;15(1):247.
5. Chiarotto A, Ostelo RW, Turk DC, et al. Core outcome sets for research and clinical practice. *Brazilian journal of physical therapy* 2017;21(2):77-84. doi: 10.1016/j.bjpt.2017.03.001 [published Online First: 2017/05/04]
6. Levey C, Innes N, Schwendicke F, et al. Outcomes in randomised controlled trials in prevention and management of carious lesions: a systematic review. *Trials* 2017;18(1):515. doi: 10.1186/s13063-017-2256-1 [published Online First: 2017/11/04]
7. Ioannidis JP, Greenland S, Hlatky MA, et al. Increasing value and reducing waste in research design, conduct, and analysis. *Lancet* 2014;383(9912):166-75. doi: 10.1016/s0140-6736(13)62227-8 [published Online First: 2014/01/15]
8. Rizos EC, Salanti G, Kontoyiannis DP, et al. Homophily and co-occurrence patterns shape randomized trials agendas: illustration in antifungal agents. *Journal of clinical epidemiology* 2011;64(8):830-42. doi: 10.1016/j.jclinepi.2010.11.017 [published Online First: 2011/03/18]
9. Salanti G, Higgins JP, Ades AE, et al. Evaluation of networks of randomized trials. *Statistical methods in medical research* 2008;17(3):279-301. doi: 10.1177/0962280207080643 [published Online First: 2007/10/11]
10. Salanti G, Kavvoura FK, Ioannidis JP. Exploring the geometry of treatment networks. *Annals of internal medicine* 2008;148(7):544-53. [published Online First: 2008/04/02]



- 1  
2  
3 11. Salanti G. Indirect and mixed-treatment comparison, network, or multiple-  
4 treatments meta-analysis: many names, many benefits, many concerns for the  
5 next generation evidence synthesis tool. *Research synthesis methods*  
6 2012;3(2):80-97. doi: 10.1002/jrsm.1037  
7  
8
- 9  
10 12. Schwendicke F, Elhennawy K, Reda S, et al. Global burden of molar incisor  
11 hypomineralization. *Journal of dentistry* 2018;68:10-18. doi:  
12 10.1016/j.jdent.2017.12.002 [published Online First: 2017/12/10]  
13  
14
- 15 13. Weerheijm KL, Duggal M, Mejare I, et al. Judgement criteria for molar incisor  
16 hypomineralisation (MIH) in epidemiologic studies: a summary of the European  
17 meeting on MIH held in Athens, 2003. *European journal of paediatric dentistry:*  
18 *official journal of European Academy of Paediatric Dentistry* 2003;4(3):110-3.  
19 [published Online First: 2003/10/08]  
20  
21
- 22 14. Weerheijm KL. Molar incisor hypomineralization (MIH): clinical presentation,  
23 aetiology and management. *Dental update* 2004;31(1):9-12. [published Online  
24 First: 2004/03/06]  
25  
26
- 27 15. Lygidakis NA, Wong F, Jalevik B, et al. Best clinical practice Guidance for clinicians  
28 dealing with children presenting with Molar-Incisor-Hypomineralisation (MIH):  
29 An EAPD Policy Document. *European archives of paediatric dentistry: official*  
30 *journal of the European Academy of Paediatric Dentistry* 2010;11(2):75-81.  
31 [published Online First: 2010/04/21]  
32  
33
- 34 16. Neves AB, Americano GCA, Soares DV, et al. Breakdown of demarcated opacities  
35 related to molar-incisor hypomineralization: a longitudinal study. *Clinical oral*  
36 *investigations* 2018. doi: 10.1007/s00784-018-2479-x [published Online First:  
37 2018/05/05]  
38  
39
- 40 17. Steffen R, Kramer N, Bekes K. The Würzburg MIH concept: the MIH treatment  
41 need index (MIH TNI): A new index to assess and plan treatment in patients  
42 with molar incisor hypomineralisation (MIH). *European archives of paediatric*  
43 *dentistry: official journal of the European Academy of Paediatric Dentistry*  
44 2017;18(5):355-61. doi: 10.1007/s40368-017-0301-0 [published Online First:  
45 2017/09/16]  
46  
47
- 48 18. Tugwell P, Boers M, Brooks P, et al. OMERACT: an international initiative to  
49 improve outcome measurement in rheumatology. *Trials* 2007;8:38. doi:  
50 10.1186/1745-6215-8-38  
51  
52  
53  
54  
55  
56  
57  
58  
59  
60

19. Innes NP, Schwendicke F, Lamont T. How do we create, and improve, the evidence base? *Br Dent J* 2016;220(12):651-5. doi: 10.1038/sj.bdj.2016.451
20. Lamont T, Schwendicke F, Innes N. Why we need a core outcome set for trials of interventions for prevention and management of caries. *Evidence-based dentistry* 2015;16(3):66-8. doi: 10.1038/sj.ebd.6401109 [published Online First: 2015/10/24]
21. Fleming PS, Koletsi D, O'Brien K, et al. Are dental researchers asking patient-important questions? A scoping review. *Journal of dentistry* 2016;49:9-13. doi: 10.1016/j.jdent.2016.04.002 [published Online First: 2016/04/14]
22. Hancocks S. Asking the right questions. *British dental journal* 2016;221(2):47. doi: 10.1038/sj.bdj.2016.511 [published Online First: 2016/07/23]
23. Smail-Faugeron V, Fron Chabouis H, Durieux P, et al. Development of a core set of outcomes for randomized controlled trials with multiple outcomes--example of pulp treatments of primary teeth for extensive decay in children. *PLoS One* 2013;8(1):e51908. doi: 10.1371/journal.pone.0051908
24. Schwendicke F, Blunck U, Paris S, et al. Choice of comparator in restorative trials: A network analysis. *Dental materials: official publication of the Academy of Dental Materials* 2015;31(12):1502-9. doi: 10.1016/j.dental.2015.09.021
25. Elhennawy K, Schwendicke F. Managing molar-incisor hypomineralization: A systematic review. *Journal of dentistry* 2016;55:16-24. doi: 10.1016/j.jdent.2016.09.012
26. Jackson M. *Social and Economic Networks*. Princeton: Princeton University Press 2008.
27. Mahony H, Tsalatsanis A, Kumar A, et al. Evolution of treatment regimens in multiple myeloma: a social network analysis. *PloS one* 2014;9(8):e104555. doi: 10.1371/journal.pone.0104555 [published Online First: 2014/08/15]
28. Valente T. *Social networks and health: models, methods, and applications*. New York: Oxford University Press 2010.
29. Schulz KF, Altman DG, Moher D, et al. CONSORT 2010 Statement: updated guidelines for reporting parallel group randomized trials. *Open Med* 2010;4(1):e60-8.
30. Leppaniemi A, Lukinmaa PL, Alaluusua S. Nonfluoride hypomineralizations in the permanent first molars and their impact on the treatment need. *Caries research* 2001;35(1):36-40. doi: 47428 [published Online First: 2000/12/23]

- 1  
2  
3  
4  
5  
6  
7  
8  
9  
10  
11  
12  
13  
14  
15  
16  
17  
18  
19  
20  
21  
22  
23  
24  
25  
26  
27  
28  
29  
30  
31  
32  
33  
34  
35  
36  
37  
38  
39  
40  
41  
42  
43  
44  
45  
46  
47  
48  
49  
50  
51  
52  
53  
54  
55  
56  
57  
58  
59  
60
31. Jalevik B, Klingberg GA. Dental treatment, dental fear and behaviour management problems in children with severe enamel hypomineralization of their permanent first molars. *International journal of paediatric dentistry / the British Paedodontic Society [and] the International Association of Dentistry for Children* 2002;12(1):24-32. [published Online First: 2002/02/21]
  32. Kotsanos N, Kaklamanos EG, Arapostathis K. Treatment management of first permanent molars in children with molar-incisor hypomineralisation. *European journal of paediatric dentistry: official journal of European Academy of Paediatric Dentistry* 2005;6(4):179-84.
  33. Mejare I, Bergman E, Grindejford M. Hypomineralized molars and incisors of unknown origin: treatment outcome at age 18 years. *International journal of paediatric dentistry / the British Paedodontic Society [and] the International Association of Dentistry for Children* 2005;15(1):20-8. doi: 10.1111/j.1365-263X.2005.00599.x [published Online First: 2005/01/25]
  34. Chawla N, Messer LB, Silva M. Clinical studies on molar-incisor-hypomineralisation part 1: distribution and putative associations. *European archives of paediatric dentistry: official journal of the European Academy of Paediatric Dentistry* 2008;9(4):180-90. [published Online First: 2008/12/05]
  35. Jalevik B, Klingberg G. Treatment outcomes and dental anxiety in 18-year-olds with MIH, comparisons with healthy controls - a longitudinal study. *International journal of paediatric dentistry / the British Paedodontic Society [and] the International Association of Dentistry for Children* 2012;22(2):85-91. doi: 10.1111/j.1365-263X.2011.01161.x [published Online First: 2011/07/26]
  36. Weerheijm KL, Jalevik B, Alaluusua S. Molar-incisor hypomineralisation. *Caries research* 2001;35(5):390-1. doi: 47479 [published Online First: 2001/10/20]
  37. Rodd HD, Morgan CR, Day PF, et al. Pulpal expression of TRPV1 in molar incisor hypomineralisation. *European archives of paediatric dentistry : official journal of the European Academy of Paediatric Dentistry* 2007;8(4):184-8. [published Online First: 2007/12/14]
  38. Fagrell TG, Lingstrom P, Olsson S, et al. Bacterial invasion of dentinal tubules beneath apparently intact but hypomineralized enamel in molar teeth with molar incisor hypomineralization. *International journal of paediatric dentistry / the British Paedodontic Society [and] the International Association of Dentistry for*

- 1  
2  
3 *Children* 2008;18(5):333-40. doi: 10.1111/j.1365-263X.2007.00908.x  
4 [published Online First: 2008/03/11]  
5  
6  
7 39. Moher D, Hopewell S, Schulz KF, et al. CONSORT 2010 explanation and  
8 elaboration: updated guidelines for reporting parallel group randomised trials.  
9 *BMJ* 2010;340:c869. doi: 10.1136/bmj.c869  
10  
11 40. Moher D, Schulz KF, Altman DG. The CONSORT statement: revised  
12 recommendations for improving the quality of reports of parallel-group  
13 randomised trials. *Lancet* 2001;357(9263):1191-4.  
14  
15 41. Gargon E, Williamson PR, Clarke M. Collating the knowledge base for core  
16 outcome set development: developing and appraising the search strategy for a  
17 systematic review. *BMC medical research methodology* 2015;15:26. doi:  
18 10.1186/s12874-015-0019-9 [published Online First: 2015/04/19]  
19  
20 42. Echevarria C, Sinha IP. Heterogeneity in the measurement and reporting of  
21 outcomes in studies of electronic cigarette use in adolescents: a systematic  
22 analysis of observational studies. *Tob Control* 2016 doi:  
23 10.1136/tobaccocontrol-2015-052881  
24  
25 43. Ebrahim S, Montoya L, Kamal El Din M, et al. Randomized trials are frequently  
26 fragmented in multiple secondary publications. *Journal of clinical epidemiology*  
27 2016;79:130-39. doi: 10.1016/j.jclinepi.2016.05.016 [published Online First:  
28 2016/07/09]  
29  
30 44. Koch MJ, Garcia-Godoy F. The clinical performance of laboratory-fabricated  
31 crowns placed on first permanent molars with developmental defects. *Journal*  
32 *of the American Dental Association (1939)* 2000;131(9):1285-90.  
33  
34 45. Lygidakis NA, Chaliasou A, Siounas G. Evaluation of composite restorations in  
35 hypomineralised permanent molars: a four year clinical study. *European journal*  
36 *of paediatric dentistry: official journal of European Academy of Paediatric*  
37 *Dentistry* 2003;4(3):143-8. [published Online First: 2003/10/08]  
38  
39 46. Zagdwon AM, Fayle SA, Pollard MA. A prospective clinical trial comparing  
40 preformed metal crowns and cast restorations for defective first permanent  
41 molars. *European journal of paediatric dentistry: official journal of European*  
42 *Academy of Paediatric Dentistry* 2003;4(3):138-42. [published Online First:  
43 2003/10/08]  
44  
45 47. Jalevik B, Møller M. Evaluation of spontaneous space closure and development of  
46 permanent dentition after extraction of hypomineralized permanent first molars.  
47  
48  
49  
50  
51  
52  
53  
54  
55  
56  
57  
58  
59  
60

- 1  
2  
3 *International journal of paediatric dentistry / the British Paedodontic Society*  
4 *[and] the International Association of Dentistry for Children* 2007;17(5):328-35.  
5 doi: 10.1111/j.1365-263X.2007.00849.x [published Online First: 2007/08/09]  
6  
7  
8  
9 48. Lygidakis NA, Dimou G, Stamataki E. Retention of fissure sealants using two  
10 different methods of application in teeth with hypomineralised molars (MIH): a  
11 4 year clinical study. *European archives of paediatric dentistry: official journal*  
12 *of the European Academy of Paediatric Dentistry* 2009;10(4):223-6. [published  
13 Online First: 2009/12/10]  
14  
15  
16  
17 49. Baroni C, Marchionni S. MIH supplementation strategies: prospective clinical and  
18 laboratory trial. *Journal of dental research* 2011;90(3):371-6. doi:  
19 10.1177/0022034510388036 [published Online First: 2010/12/15]  
20  
21  
22 50. Gaardmand E, Poulsen S, Haubek D. Pilot study of minimally invasive cast  
23 adhesive copings for early restoration of hypomineralised first permanent  
24 molars with post-eruptive breakdown. *European archives of paediatric*  
25 *dentistry: official journal of the European Academy of Paediatric Dentistry*  
26 2013;14(1):35-9. doi: 10.1007/s40368-012-0002-7 [published Online First:  
27 2013/03/28]  
28  
29  
30  
31  
32 51. Cabasse C, Marie-Cousin A, Huet A, et al. Computer-assisted intraosseous  
33 anaesthesia for molar and incisor hypomineralisation teeth. A preliminary study.  
34 *Odonto-stomatologie tropicale = Tropical dental journal* 2015;38(149):5-9.  
35 [published Online First: 2015/06/11]  
36  
37  
38  
39 52. Fragelli CM, Souza JF, Jeremias F, et al. Molar incisor hypomineralization (MIH):  
40 conservative treatment management to restore affected teeth. *Brazilian oral*  
41 *research* 2015;29 doi: 10.1590/1807-3107BOR-2015.vol29.0076 [published  
42 Online First: 2015/06/18]  
43  
44  
45  
46 53. Bekes K, Heinzemann K, Lettner S, et al. Efficacy of desensitizing products  
47 containing 8% arginine and calcium carbonate for hypersensitivity relief in MIH-  
48 affected molars: an 8-week clinical study. *Clinical oral investigations* 2016 doi:  
49 10.1007/s00784-016-2024-8 [published Online First: 2016/12/23]  
50  
51  
52  
53 54. Bakkal M, Abbasoglu Z, Kargul B. The Effect of Casein Phosphopeptide-  
54 Amorphous Calcium Phosphate on Molar-Incisor Hypomineralisation: A Pilot  
55 Study. *Oral health & preventive dentistry* 2017;15(2):163-67. doi:  
56 10.3290/j.ohpd.a37928 [published Online First: 2017/03/23]  
57  
58  
59  
60

- 1  
2  
3  
4  
5  
6  
7  
8  
9  
10  
11  
12  
13  
14  
15  
16  
17  
18  
19  
20  
21  
22  
23  
24  
25  
26  
27  
28  
29  
30  
31  
32  
33  
34  
35  
36  
37  
38  
39  
40  
41  
42  
43  
44  
45  
46  
47  
48  
49  
50  
51  
52  
53  
54  
55  
56  
57  
58  
59  
60
55. de Souza JF, Fragelli CB, Jeremias F, et al. Eighteen-month clinical performance of composite resin restorations with two different adhesive systems for molars affected by molar incisor hypomineralization. *Clinical oral investigations* 2017;21(5):1725-33. doi: 10.1007/s00784-016-1968-z [published Online First: 2016/10/16]
56. Fragelli CMB, Souza JF, Bussaneli DG, et al. Survival of sealants in molars affected by molar-incisor hypomineralization: 18-month follow-up. *Brazilian oral research* 2017;31:e30. doi: 10.1590/1807-3107BOR-2017.vol31.0030 [published Online First: 2017/05/11]
57. Sonmez H, Saat S. A Clinical Evaluation of Deproteinization and Different Cavity Designs on Resin Restoration Performance in MIH-Affected Molars: Two-Year Results. *The Journal of clinical pediatric dentistry* 2017;41(5):336-42. doi: 10.17796/1053-4628-41.5.336 [published Online First: 2017/09/06]
58. Dixit UB, Joshi AV. Efficacy of Intraosseous Local Anesthesia for Restorative Procedures in Molar Incisor Hypomineralization-Affected Teeth in Children. *Contemporary clinical dentistry* 2018;9(Suppl 2):S272-S77. doi: 10.4103/ccd.ccd\_252\_18 [published Online First: 2018/10/09]
59. Folayan MO, Oyedele TA, Oziegbe E. Time expended on managing molar incisor hypomineralization in a pediatric dental clinic in Nigeria. *Brazilian oral research* 2018;32:e79. doi: 10.1590/1807-3107bor-2018.vol32.0079 [published Online First: 2018/08/09]
60. Grossi JA, Cabral RN, Ribeiro APD, et al. Glass hybrid restorations as an alternative for restoring hypomineralized molars in the ART model. *BMC oral health* 2018;18(1):65. doi: 10.1186/s12903-018-0528-0 [published Online First: 2018/04/20]
61. Koleventi A, Sakellari D, Arapostathis KN, et al. Periodontal Impact of Preformed Metal Crowns on Permanent Molars of Children and Adolescents: A Pilot Study. *Pediatric dentistry* 2018;40(2):117-21. [published Online First: 2018/04/18]
62. Pasini M, Giuca MR, Scatena M, et al. Molar incisor hypomineralization treatment with casein phosphopeptide and amorphous calcium phosphate in children. *Minerva stomatologica* 2018;67(1):20-25. doi: 10.23736/s0026-4970.17.04086-9 [published Online First: 2017/10/05]
63. Dhareula A, Goyal A, Gauba K, et al. A clinical and radiographic investigation comparing the efficacy of cast metal and indirect resin onlays in rehabilitation

- 1  
2  
3 of permanent first molars affected with severe molar incisor hypomineralisation  
4 (MIH): a 36-month randomised controlled clinical trial. *European archives of*  
5 *paediatric dentistry: official journal of the European Academy of Paediatric*  
6 *Dentistry* 2019 doi: 10.1007/s40368-019-00430-y [published Online First:  
7 2019/03/20]  
8  
9  
10  
11  
12 64. Wong FS, Winter GB. Effectiveness of microabrasion technique for improvement  
13 of dental aesthetics. *British dental journal* 2002;193(3):155-8. doi:  
14 10.1038/sj.bdj.4801511a [published Online First: 2002/09/06]  
15  
16  
17 65. Ozgul BM, Saat S, Sonmez H, et al. Clinical evaluation of desensitizing treatment  
18 for incisor teeth affected by molar-incisor hypomineralization. *The Journal of*  
19 *clinical paediatric dentistry* 2013;38(2):101-5. [published Online First:  
20 2013/01/01]  
21  
22  
23  
24 66. Sheoran N, Garg S, Damle SG, et al. Esthetic management of developmental  
25 enamel opacities in young permanent maxillary incisors with two microabrasion  
26 techniques--a split mouth study. *Journal of esthetic and restorative dentistry:*  
27 *official publication of the American Academy of Esthetic Dentistry [et al]*  
28 2014;26(5):345-52. doi: 10.1111/jerd.12096 [published Online First:  
29 2014/03/05]  
30  
31  
32  
33  
34 67. Restrepo M, Jeremias F, Santos-Pinto L, et al. Effect of Fluoride Varnish on  
35 Enamel Remineralization in Anterior Teeth with Molar Incisor  
36 Hypomineralization. *The Journal of clinical pediatric dentistry* 2016;40(3):207-  
37 10. doi: 10.17796/1053-4628-40.3.207 [published Online First: 2016/07/30]  
38  
39  
40  
41 68. Bhandari R, Thakur S, Singhal P, et al. Concealment effect of resin infiltration on  
42 incisor of Grade I molar incisor hypomineralization patients: An in vivo study.  
43 *Journal of conservative dentistry: JCD* 2018;21(4):450-54. doi:  
44 10.4103/jcd.Jcd\_61\_18 [published Online First: 2018/08/21]  
45  
46  
47  
48 69. Hasmun N, Lawson J, Vettore MV, et al. Change in Oral Health-Related Quality of  
49 Life Following Minimally Invasive Aesthetic Treatment for Children with Molar  
50 Incisor Hypomineralisation: A Prospective Study. *Dentistry journal* 2018;6(4)  
51 doi: 10.3390/dj6040061 [published Online First: 2018/11/06]  
52  
53  
54  
55  
56  
57  
58  
59  
60

**Table 1.** Characteristics of included studies (n=35). Studies were separated according to target condition (MIH in molars or incisors), and ordered chronologically.

| Author                              | Year | Setting | N part. | Age   | Study type | Follow-up (months) | Trial reg. | No. of Arms | P cal. |
|-------------------------------------|------|---------|---------|-------|------------|--------------------|------------|-------------|--------|
| <b>Molars</b>                       |      |         |         |       |            |                    |            |             |        |
| Koch and Garcia-Godoy <sup>44</sup> | 2000 | Uni. H  | 12      | 6-8   | Pro Co     | 24-60              | n          | 3           | n      |
| Lygidakis et al. <sup>45</sup>      | 2003 | Uni. H  | 46      | 8-10  | Pro Co     | 48                 | n          | 1           | n      |
| Zagdwon et al. <sup>46</sup>        | 2003 | Uni. H  | 17      | 6-16  | RCT        | 12-24              | n          | 2           | y      |
| Kotsanos et al. <sup>32</sup>       | 2005 | Uni. H  | 72      | 8     | Retro Co   | 52                 | n          | 4           | n      |
| Mejare et al. <sup>33</sup>         | 2005 | Uni. H  | 76      | 6-17  | Retro Co   | 62                 | n          | 7           | n      |
| Jalevik and Moller <sup>47</sup>    | 2007 | Uni. H  | 27      | 6-13  | Retro Co   | 44-99              | n          | 1           | n      |
| Lygidakis et al. <sup>48</sup>      | 2009 | Uni. H  | 47      | 6-7   | RCT        | 48                 | n          | 2           | n      |
| Baroni and Marchionni <sup>49</sup> | 2011 | Uni. H  | 30      | 6-9   | Pro Co     | 36                 | n          | 1           | n      |
| Gaardmand et al. <sup>50</sup>      | 2013 | Uni. H  | 33      | 8-18  | Retro Co   | 39                 | n          | 1           | n      |
| Cabasse et al. <sup>51</sup>        | 2015 | Uni. H  | 39      | 9     | Pro Co     | n                  | n          | 1           | n      |
| Fragelli et al. <sup>52</sup>       | 2015 | Uni. H  | 21      | 6-9   | Pro Co     | 12                 | n          | 1           | n      |
| Bekes et al. <sup>53</sup>          | 2016 | Uni. H  | 16      | 8     | Pro Co     | 2                  | n          | 2           | y      |
| Bakkal et al. <sup>54</sup>         | 2017 | Uni. H  | 38      | 7-12  | RCT        | 1                  | n          | 2           | n      |
| de Souza et al. <sup>55</sup>       | 2017 | Uni. H  | 18      | 6-8   | RCT        | 18                 | y          | 2           | n      |
| Fragelli et al. <sup>56</sup>       | 2017 | Uni. H  | 21      | 6-8   | RCT        | 18                 | n          | 2           | y      |
| Sönmez and Saat <sup>57</sup>       | 2017 | Uni. H  | 42      | 8-12  | RCT        | 24                 | n          | 4           | n      |
| Dixit and Joshi <sup>58</sup>       | 2018 | Uni. H  | 32      | 8-14  | RCT        | n/a                | n          | 2           | y      |
| Folayan et al. <sup>59</sup>        | 2018 | Uni. H  | 73      | 8-16  | Pro Co     | n/a                | n          | 2           | n      |
| Grossi et al. <sup>60</sup>         | 2018 | Uni. H  | 40      | 7-13  | Pro Co     | 12                 | y          | 1           | n      |
| Koleventi et al. <sup>61</sup>      | 2018 | Uni. H  | 14      | 11    | Pro Co     | 6                  | n          | 2           | n      |
| Pasini et al. <sup>62</sup>         | 2018 | Uni. H  | 40      | 8-13  | Pro Co     | 4                  | n/a        | 2           | n/a    |
| Dhareula et al. <sup>63</sup>       | 2019 | Uni. H  | 30      | 8-13  | RCT        | 36                 | y          | 2           | y      |
| <b>Incisors</b>                     |      |         |         |       |            |                    |            |             |        |
| Wong and Winter <sup>64</sup>       | 2002 | Uni. H  | 15      | n/a   | RCT        | 6                  | n          | 1           | n      |
| Özgül et al <sup>65</sup>           | 2013 | Uni. H  | 33      | 7-12  | RCT        | 1                  | n          | 6           | n      |
| Sheoran et al. <sup>66</sup>        | 2014 | Uni. H  | 25      | 11-13 | RCT        | 1                  | n          | 2           | n      |



1  
2  
3  
4  
5  
6  
7  
8  
9  
10  
11  
12  
13  
14  
15  
16  
17  
18  
19  
20  
21  
22  
23  
24  
25  
26  
27  
28  
29  
30  
31  
32  
33  
34  
35  
36  
37  
38  
39  
40  
41  
42  
43  
44  
45  
46  
47  
48  
49  
50  
51  
52  
53  
54  
55  
56  
57  
58  
59  
60

|                               |      |        |     |      |        |     |   |   |     |
|-------------------------------|------|--------|-----|------|--------|-----|---|---|-----|
| Restrepo et al. <sup>67</sup> | 2016 | Uni. H | 51  | 9-12 | Pro Co | 1   | n | 2 | y   |
| Bhandari et al. <sup>68</sup> | 2018 | Uni. H | n/a | 7-16 | Pro Co | 6   | n | 1 | n   |
| Hasmun et al. <sup>69</sup>   | 2018 | Uni. H | 111 | 7-16 | Pro Co | n/a | n | 1 | y   |
| <b>Only Registered</b>        |      |        |     |      |        |     |   |   |     |
| DRKS00009760                  | 2016 | Uni. H | 40  | 6-70 | RCT    | 6   | y | 2 | n   |
| DRKS00011882                  | 2017 | Uni. H | 300 | 7-14 | Pro Co | 0,5 | y | 3 | n/a |
| NCT03614819                   | 2018 | Uni. H | 122 | 6-10 | RCT    | 24  | y | 2 | n/a |
| NCT03760497                   | 2018 | Uni. H | 300 | 6-10 | RCT    | 24  | y | 3 | n/a |
| NCT03826810                   | 2019 | Uni. H | 48  | n/a  | RCT    | 12  | y | 2 | n/a |
| NCT03870958                   | 2019 | Uni. H | 195 | 6-9  | RCT    | 36  | y | 2 | n/a |
| NCT03862014                   | 2019 | Uni. H | 100 | 6-10 | RCT    | 24  | y | 2 | n/a |

**Abbreviations:** N of part., number of participants; n/a, not available; Pro Co, prospective cohort; Retro Co, retrospective cohort; RCT, randomized control trial; Uni. H, University hospital; Trial reg., trial registration, P cal., power calculation; n, no; y, yes

**Table 2.** Reported outcome category, outcome examples and outcomes measures, ordered according to the frequency of use in included studies.

| Outcome category                   | Outcome examples                                     | Exemplary outcome measures                                                                                      |
|------------------------------------|------------------------------------------------------|-----------------------------------------------------------------------------------------------------------------|
| Restoration success                | Clinical performance                                 | Modified US Public Health Service (USPHS) criteria                                                              |
|                                    | Restoration quality                                  | Modified atraumatic restorative treatment (ART) criteria                                                        |
|                                    | Survival of tooth and restoration                    | Radiographic evaluation (Bitewings)                                                                             |
|                                    |                                                      | Number of reinterventions                                                                                       |
|                                    | Survival rate                                        |                                                                                                                 |
| Pain/ discomfort/ hypersensitivity | Response to stimulus                                 | Schiff Cold Air Sensitivity Scale (SCASS)                                                                       |
|                                    | Pain during and after dental treatment/ intervention | Questionnaires                                                                                                  |
|                                    |                                                      | Modified behavior pain scale                                                                                    |
|                                    |                                                      | Visual Analogue Scale (VAS)                                                                                     |
| Aesthetic improvement              | Aesthetic improvement                                | Questionnaires                                                                                                  |
|                                    |                                                      | Clinical photography                                                                                            |
| Mineral gain                       | Mineral gain                                         | Laserfluorescence readings                                                                                      |
|                                    |                                                      | Scanning electron microscope (SEM)/                                                                             |
|                                    |                                                      | Energy Dispersive X-ray Spectrometry (EDX)                                                                      |
|                                    |                                                      | Quantitative Light-Induced Fluorescence (QLF)                                                                   |
| Space management                   | Space closure after extraction                       | Amount of spontaneous space closure                                                                             |
|                                    | Need of orthodontic intervention                     |                                                                                                                 |
| Anesthesia effectiveness           | Anesthesia technique                                 | Presence of pain during treatment                                                                               |
|                                    | Need for local anesthesia                            | Pain efficacy scale                                                                                             |
| Preventive success                 | Clinical performance                                 | Success/ Modified US Public Health Service (USPHS) criteria                                                     |
|                                    | Sealant quality                                      |                                                                                                                 |
|                                    | Ability to prevent caries and enamel breakdown       |                                                                                                                 |
| Efficiency                         | Costs of treatment                                   | Placement time                                                                                                  |
|                                    |                                                      | Used materials                                                                                                  |
|                                    |                                                      | Laboratory costs                                                                                                |
| Quality of life                    | Oral health-related quality of life (OHRQoL)         | Self-administered oral health related quality of life (OHRQoL) questionnaires (COHIP G-19, CPQ 8-10, CPQ 11-14) |
| Gingival and periodontal health    | Presence of gingivitis and periodontitis             | Gingival index (GI)                                                                                             |
|                                    | Oral hygiene                                         | Pocket depth (PD)                                                                                               |
|                                    | Subgingival microbiota                               | Turesky plaque index                                                                                            |
|                                    |                                                      | Checkerboard DNA-DNA hybridization                                                                              |
| Patient satisfaction               | Patient satisfaction with treatment                  | Visual Analogue Scale (VAS)                                                                                     |
|                                    |                                                      | Questionnaires                                                                                                  |

**Table 3.** Primary and secondary outcomes reported in each study.

| Author (year)                              | Restoration success | Pain/ discomfort/<br>hypersensitivity | Aesthetic improvement | Mineral gain | Space management | Anesthesia effectiveness | Preventive success | Efficiency | Quality of life | Gingival and periodontal<br>health | Patient satisfaction |
|--------------------------------------------|---------------------|---------------------------------------|-----------------------|--------------|------------------|--------------------------|--------------------|------------|-----------------|------------------------------------|----------------------|
| Koch and Garcia-Godoy (2000) <sup>44</sup> | x                   |                                       |                       |              |                  |                          |                    |            |                 |                                    |                      |
| Wong and Winter (2002) <sup>64</sup>       |                     |                                       | x                     |              |                  |                          |                    |            |                 |                                    |                      |
| Lygidakis et al. (2003) <sup>45</sup>      | x                   | ♦                                     |                       |              |                  |                          | ♦                  |            |                 |                                    |                      |
| Zagdwon et al. (2003) <sup>46</sup>        | x                   |                                       |                       |              |                  |                          |                    | ♦          |                 |                                    |                      |
| Kotsanos et al. (2005) <sup>32</sup>       | x                   |                                       |                       |              | ♦                |                          |                    |            |                 |                                    |                      |
| Mejare et al. (2005) <sup>33</sup>         | x                   |                                       |                       |              | ♦                |                          |                    |            |                 |                                    |                      |
| Jalevik and Moller (2007) <sup>47</sup>    |                     |                                       |                       |              | x                |                          |                    |            |                 |                                    |                      |
| Lygidakis et al. (2009) <sup>48</sup>      | x                   |                                       |                       |              |                  |                          |                    |            |                 |                                    |                      |
| Baroni and Marchionni (2011) <sup>49</sup> |                     |                                       |                       | x            |                  |                          |                    |            |                 |                                    |                      |
| Gaardmand et al. (2013) <sup>50</sup>      | x                   |                                       |                       |              |                  |                          |                    |            |                 |                                    |                      |
| Özgül et al (2013) <sup>65</sup>           |                     | x                                     |                       |              |                  |                          |                    |            |                 |                                    |                      |
| Sheoran et al. (2014) <sup>66</sup>        |                     |                                       | x                     |              |                  |                          |                    |            |                 |                                    |                      |
| Cabasse et al. (2015) <sup>51</sup>        |                     |                                       |                       |              |                  | x                        |                    |            |                 |                                    |                      |
| Fragelli et al. (2015) <sup>52</sup>       | x                   |                                       |                       |              |                  |                          |                    |            |                 |                                    |                      |
| Bekes et al. (2016) <sup>53</sup>          |                     | x                                     |                       |              |                  |                          |                    |            |                 |                                    |                      |
| DRKS00009760 (2016)                        |                     |                                       | x                     |              |                  |                          |                    |            |                 |                                    |                      |
| Restrepo et al. (2016) <sup>67</sup>       |                     |                                       |                       | x            |                  |                          |                    |            |                 |                                    |                      |
| Bakkal et al. (2017) <sup>54</sup>         |                     |                                       |                       | x            |                  |                          |                    |            |                 |                                    |                      |
| de Souza et al. (2017) <sup>55</sup>       | x                   |                                       |                       |              |                  |                          |                    |            |                 |                                    |                      |
| DRKS00011882 (2017)                        |                     |                                       |                       |              |                  |                          |                    |            | x               |                                    |                      |
| Fragelli et al. (2017) <sup>56</sup>       | x                   |                                       |                       |              |                  |                          | ♦                  |            |                 |                                    |                      |
| Sönmez and Saat (2017) <sup>57</sup>       | x                   | ♦                                     |                       |              |                  |                          |                    |            |                 |                                    |                      |
| Bhandari et al. (2018) <sup>68</sup>       |                     |                                       | x                     |              |                  |                          |                    |            |                 |                                    |                      |
| Dixit and Joshi (2018) <sup>58</sup>       |                     | ♦                                     |                       |              |                  | x                        |                    | ♦          |                 |                                    |                      |
| Folayan et al. (2018) <sup>59</sup>        |                     |                                       |                       |              |                  |                          |                    | x          |                 |                                    |                      |
| Grossi et al. (2018) <sup>60</sup>         | x                   | ♦                                     |                       |              |                  | ♦                        |                    |            |                 |                                    |                      |
| Hasmun et al. (2018) <sup>69</sup>         |                     |                                       |                       |              |                  |                          |                    |            | x               |                                    |                      |



**Figure legends:**

**Figure 1.** Flow chart of the search.

**Figure 2.** Reported outcomes for MIH intervention studies over time. N number of studies using this outcome in the specific period.

**Figure 3.** Networks of comparisons made in molars. Different comparators (nodes) were compared directly with each other. The node diameter represents the number of studies involving this comparator, moreover the number of studies is added between brackets in each node, the thickness of the edge represents the number of direct comparisons between two comparators. Certain comparators were not connected to the main network. Abbreviations: PMC, preformed metal crowns; GIC, glass ionomer cement; ART, atraumatic restorative treatment; aPDT, low-intensity laser and photodynamic Therapy; SDF, silver diamine Fluoride; ARR, atraumatic resin restoration; CPP-ACP; casein phosphopeptide-amorphous calcium phosphate; SEA, self-etching adhesive; TEA; total-etch adhesive; HCL; hydrochloric acid; NaOCl, sodium hypochlorite.

**Figure 4.** Networks of comparisons made in incisors. Different comparators (nodes) were compared directly with each other. The node diameter represents the number of studies involving this comparator, moreover the number of studies is added between brackets in each node, the thickness of the edge the number of direct comparisons between two comparators. Certain comparators were not connected to the main network. Abbreviations: CPP-ACP; casein phosphopeptide-amorphous calcium phosphate; HCL; hydrochloric acid showing studies on MIH-affected molars, while B) studies on MIH-affected incisors.

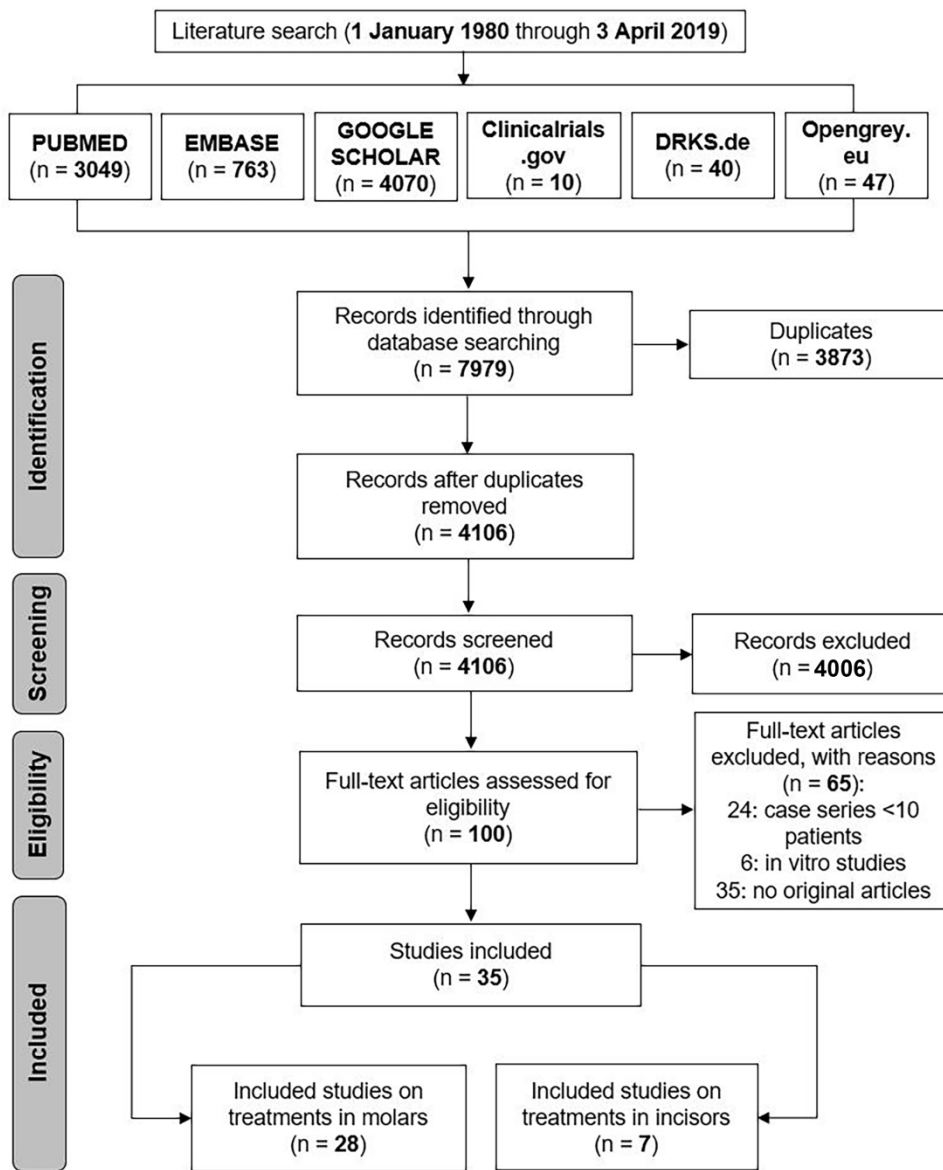

Figure 1. Flow chart of the search.

209x252mm (300 x 300 DPI)

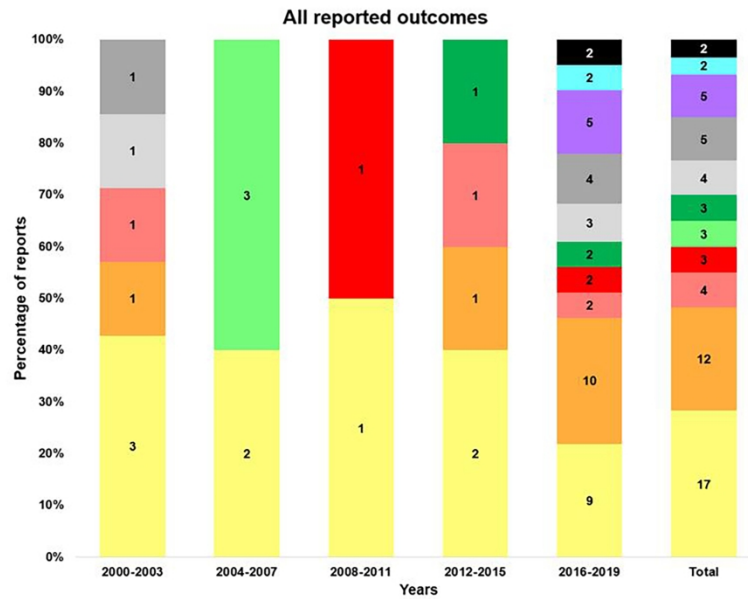

|                                     | 2000-2003 | 2004-2007 | 2008-2011 | 2012-2015 | 2016-2019 | Total   |
|-------------------------------------|-----------|-----------|-----------|-----------|-----------|---------|
| 1. Restoration success              | 3         | 2         | 1         | 2         | 9         | 17      |
| 2. Pain/discomfort/hypersensitivity | 1         |           |           | 1         | 10        | 12      |
| 3. Aesthetic improvement            | 1         |           |           | 1         | 2         | 4       |
| 4. Mineral gain                     |           |           | 1         |           | 2         | 3       |
| 5. Space management                 |           | 3         |           |           |           | 3       |
| 6. Anesthesia effectiveness         |           |           |           | 1         | 2         | 3       |
| 7. Preventive success               | 1         |           |           |           | 3         | 4       |
| 8. Efficiency                       | 1         |           |           |           | 4         | 5       |
| 9. Quality of life                  |           |           |           |           | 5         | 5       |
| 10. Gingival and Periodontal health |           |           |           |           | 2         | 2       |
| 11. Patient satisfaction            |           |           |           |           | 2         | 2       |
| Total                               | 7         | 5         | 2         | 5         | 41        | 60      |
| %                                   | 11.67%    | 8.33%     | 3%        | 8.33%     | 68.33%    | 100.00% |

Figure 2. Reported outcomes for MIH intervention studies over time. N number of studies using this outcome in the specific period.

264x244mm (300 x 300 DPI)

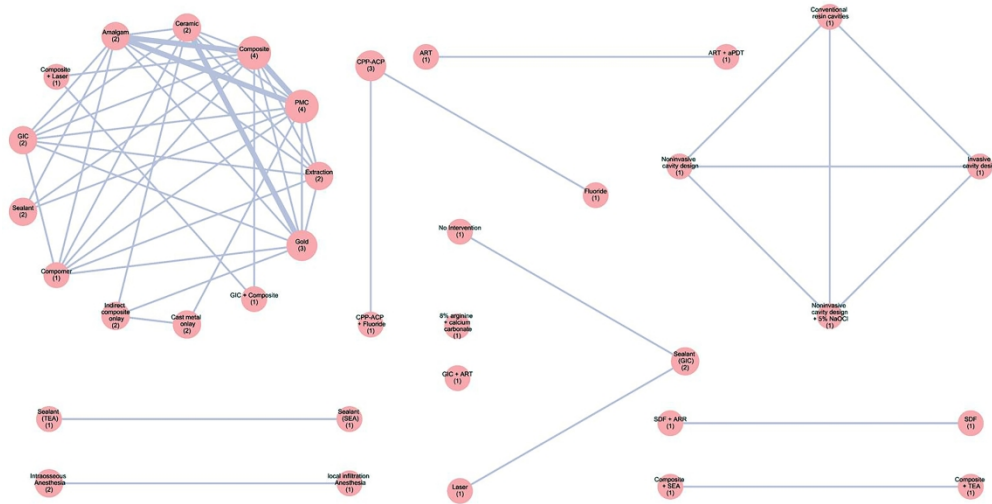

Figure 3. Networks of comparisons made in molars. Different comparators (nodes) were compared directly with each other. The node diameter represents the number of studies involving this comparator, moreover the number of studies is added between brackets in each node, the thickness of the edge represents the number of direct comparisons between two comparators. Certain comparators were not connected to the main network. Abbreviations: PMC, preformed metal crowns; GIC, glass ionomer cement; ART, atraumatic restorative treatment; aPDT, low-intensity laser and photodynamic Therapy; SDF, silver diamine Fluoride; ARR, atraumatic resin restoration; CPP-ACP; casein phosphopeptide-amorphous calcium phosphate; SEA, self-etching adhesive; TEA; total-etch adhesive; HCL; hydrochloric acid; NaOCl, sodium hypochlorite.

417x218mm (300 x 300 DPI)



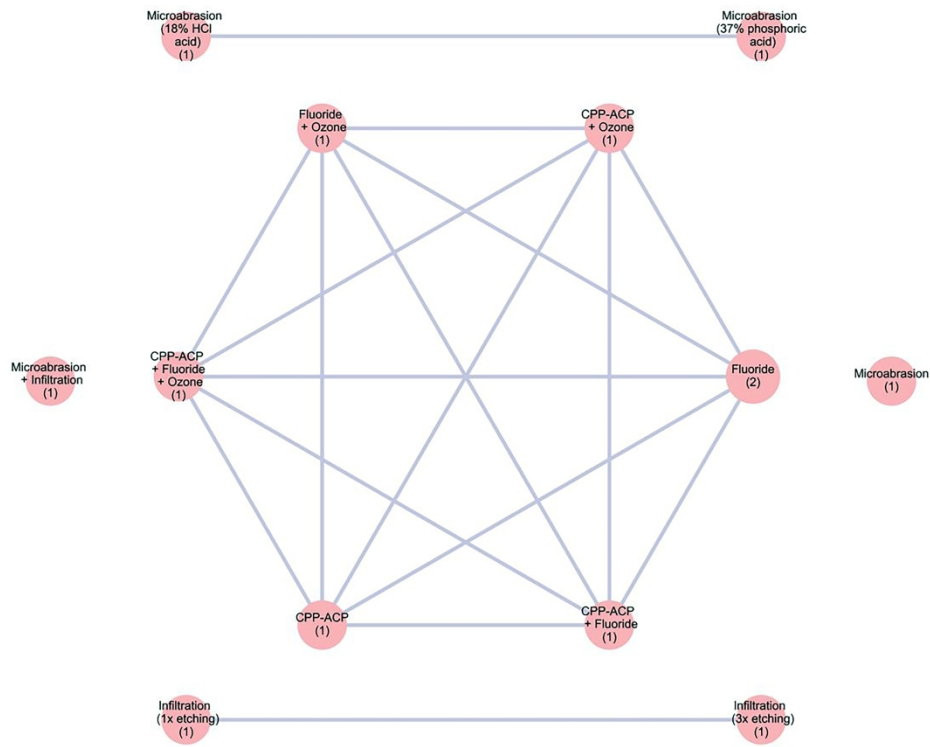

Figure 4. Networks of comparisons made in incisors. Different comparators (nodes) were compared directly with each other. The node diameter represents the number of studies involving this comparator, moreover the number of studies is added between brackets in each node, the thickness of the edge the number of direct comparisons between two comparators. Certain comparators were not connected to the main network. Abbreviations: CPP-ACP; casein phosphopeptide-amorphous calcium phosphate; HCL; hydrochloric acid showing studies on MIH-affected molars, while B) studies on MIH-affected incisors.

312x234mm (300 x 300 DPI)

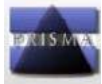

# PRISMA 2009 Checklist

| Section/topic                      | #  | Checklist item                                                                                                                                                                                                                                                                                              | Reported on page # |
|------------------------------------|----|-------------------------------------------------------------------------------------------------------------------------------------------------------------------------------------------------------------------------------------------------------------------------------------------------------------|--------------------|
| <b>TITLE</b>                       |    |                                                                                                                                                                                                                                                                                                             |                    |
| Title                              | 1  | Identify the report as a systematic review, meta-analysis, or both.                                                                                                                                                                                                                                         | 1                  |
| <b>ABSTRACT</b>                    |    |                                                                                                                                                                                                                                                                                                             |                    |
| Structured summary                 | 2  | Provide a structured summary including, as applicable: background; objectives; data sources; study eligibility criteria, participants, and interventions; study appraisal and synthesis methods; results; limitations; conclusions and implications of key findings; systematic review registration number. | 2                  |
| <b>INTRODUCTION</b>                |    |                                                                                                                                                                                                                                                                                                             |                    |
| Rationale                          | 3  | Describe the rationale for the review in the context of what is already known.                                                                                                                                                                                                                              | 4                  |
| Objectives                         | 4  | Provide an explicit statement of questions being addressed with reference to participants, interventions, comparisons, outcomes, and study design (PICOS).                                                                                                                                                  | 4                  |
| <b>METHODS</b>                     |    |                                                                                                                                                                                                                                                                                                             |                    |
| Protocol and registration          | 5  | Indicate if a review protocol exists, if and where it can be accessed (e.g., Web address), and, if available, provide registration information including registration number.                                                                                                                               | 4-6                |
| Eligibility criteria               | 6  | Specify study characteristics (e.g., PICOS, length of follow-up) and report characteristics (e.g., years considered, language, publication status) used as criteria for eligibility, giving rationale.                                                                                                      | 5                  |
| Information sources                | 7  | Describe all information sources (e.g., databases with dates of coverage, contact with study authors to identify additional studies) in the search and date last searched.                                                                                                                                  | 4                  |
| Search                             | 8  | Present full electronic search strategy for at least one database, including any limits used, such that it could be repeated.                                                                                                                                                                               | 4                  |
| Study selection                    | 9  | State the process for selecting studies (i.e., screening, eligibility, included in systematic review, and, if applicable, included in the meta-analysis).                                                                                                                                                   | 5                  |
| Data collection process            | 10 | Describe method of data extraction from reports (e.g., piloted forms, independently, in duplicate) and any processes for obtaining and confirming data from investigators.                                                                                                                                  | 4-5                |
| Data items                         | 11 | List and define all variables for which data were sought (e.g., PICOS, funding sources) and any assumptions and simplifications made.                                                                                                                                                                       | 5                  |
| Risk of bias in individual studies | 12 | Describe methods used for assessing risk of bias of individual studies (including specification of whether this was done at the study or outcome level), and how this information is to be used in any data synthesis.                                                                                      | 5                  |
| Summary measures                   | 13 | State the principal summary measures (e.g., risk ratio, difference in means).                                                                                                                                                                                                                               | 7                  |
| Synthesis of results               | 14 | Describe the methods of handling data and combining results of studies, if done, including measures of consistency (e.g., $I^2$ ) for each meta-analysis.                                                                                                                                                   | 5-6                |



# PRISMA 2009 Checklist

| Section/topic                 | #  | Checklist item                                                                                                                                                                                           | Reported on page # |
|-------------------------------|----|----------------------------------------------------------------------------------------------------------------------------------------------------------------------------------------------------------|--------------------|
| Risk of bias across studies   | 15 | Specify any assessment of risk of bias that may affect the cumulative evidence (e.g., publication bias, selective reporting within studies).                                                             | -                  |
| Additional analyses           | 16 | Describe methods of additional analyses (e.g., sensitivity or subgroup analyses, meta-regression), if done, indicating which were pre-specified.                                                         | 7                  |
| <b>RESULTS</b>                |    |                                                                                                                                                                                                          |                    |
| Study selection               | 17 | Give numbers of studies screened, assessed for eligibility, and included in the review, with reasons for exclusions at each stage, ideally with a flow diagram.                                          | 6                  |
| Study characteristics         | 18 | For each study, present characteristics for which data were extracted (e.g., study size, PICOS, follow-up period) and provide the citations.                                                             | 7                  |
| Risk of bias within studies   | 19 | Present data on risk of bias of each study and, if available, any outcome level assessment (see item 12).                                                                                                | 7                  |
| Results of individual studies | 20 | For all outcomes considered (benefits or harms), present, for each study: (a) simple summary data for each intervention group (b) effect estimates and confidence intervals, ideally with a forest plot. | -                  |
| Synthesis of results          | 21 | Present results of each meta-analysis done, including confidence intervals and measures of consistency.                                                                                                  | -                  |
| Risk of bias across studies   | 22 | Present results of any assessment of risk of bias across studies (see Item 15).                                                                                                                          | -                  |
| Additional analysis           | 23 | Give results of additional analyses, if done (e.g., sensitivity or subgroup analyses, meta-regression [see Item 16]).                                                                                    | 8                  |
| <b>DISCUSSION</b>             |    |                                                                                                                                                                                                          |                    |
| Summary of evidence           | 24 | Summarize the main findings including the strength of evidence for each main outcome; consider their relevance to key groups (e.g., healthcare providers, users, and policy makers).                     | 8-10               |
| Limitations                   | 25 | Discuss limitations at study and outcome level (e.g., risk of bias), and at review-level (e.g., incomplete retrieval of identified research, reporting bias).                                            | 9                  |
| Conclusions                   | 26 | Provide a general interpretation of the results in the context of other evidence, and implications for future research.                                                                                  | -                  |
| <b>FUNDING</b>                |    |                                                                                                                                                                                                          |                    |
| Funding                       | 27 | Describe sources of funding for the systematic review and other support (e.g., supply of data); role of funders for the systematic review.                                                               | 11                 |

From: Moher D, Liberati A, Tetzlaff J, Altman DG, The PRISMA Group (2009). Preferred Reporting Items for Systematic Reviews and Meta-Analyses: The PRISMA Statement. PLoS Med 6(6): e1000097. doi:10.1371/journal.pmed1000097

For more information, visit: [www.prisma-statement.org](http://www.prisma-statement.org).

# BMJ Open

## Outcome and comparator choice in Molar Incisor Hypomineralization (MIH) Intervention Studies: A Systematic Review and Social Network Analysis

|                                 |                                                                                                                                                                                                                                                                                                                                                                                                                                                                                 |
|---------------------------------|---------------------------------------------------------------------------------------------------------------------------------------------------------------------------------------------------------------------------------------------------------------------------------------------------------------------------------------------------------------------------------------------------------------------------------------------------------------------------------|
| Journal:                        | <i>BMJ Open</i>                                                                                                                                                                                                                                                                                                                                                                                                                                                                 |
| Manuscript ID                   | bmjopen-2018-028352.R2                                                                                                                                                                                                                                                                                                                                                                                                                                                          |
| Article Type:                   | Research                                                                                                                                                                                                                                                                                                                                                                                                                                                                        |
| Date Submitted by the Author:   | 17-Jun-2019                                                                                                                                                                                                                                                                                                                                                                                                                                                                     |
| Complete List of Authors:       | Elhennawy, Karim; Charite Universitätsmedizin Berlin, Department of Orthodontics, Dentofacial Orthopedics and Pedodontics<br>Krois, Joachim; Charite Universitätsmedizin Berlin, Department of Operative and Preventive Dentistry<br>Jost-Brinkmann, Paul-Georg; Charite Medical Faculty Berlin, Department of Orthodontics, Dentofacial Orthopedics and Pedodontics<br>Schwendicke, Falk; Charite Universitätsmedizin Berlin, Department of Operative and Preventive Dentistry |
| <b>Primary Subject Heading</b>: | Dentistry and oral medicine                                                                                                                                                                                                                                                                                                                                                                                                                                                     |
| Secondary Subject Heading:      | Dentistry and oral medicine, Evidence based practice, Health services research, Research methods                                                                                                                                                                                                                                                                                                                                                                                |
| Keywords:                       | Systematic review, Molar incisor hypomineralization, core outcome set, MIH, prevention, management                                                                                                                                                                                                                                                                                                                                                                              |
|                                 |                                                                                                                                                                                                                                                                                                                                                                                                                                                                                 |

SCHOLARONE™  
Manuscripts

1  
2  
3 **Outcome and comparator choice in Molar Incisor Hypomineralization (MIH)**  
4 **Intervention Studies: A Systematic Review and Social Network Analysis**  
5

6 Karim Elhennawy<sup>1, 2\*</sup>, Joachim Krois<sup>2</sup>, Paul-Georg Jost-Brinkmann<sup>1</sup>, Falk  
7 Schwendicke<sup>2</sup>  
8

9  
10 <sup>1</sup> Centre for Dental and Craniofacial Sciences, Department of Orthodontics,  
11 Dentofacial Orthopedics and Pedodontics, Charité - Universitätsmedizin Berlin,  
12 Germany, Aßmannshauer Str. 4-6, 14197 Berlin, Germany  
13

14 <sup>2</sup> Centre for Dental and Craniofacial Sciences, Department of Operative and  
15 Preventive Dentistry, Charité - Universitätsmedizin Berlin, Germany, Aßmannshauer  
16 Str. 4-6, 14197 Berlin, Germany  
17

18 **\* Corresponding author:**  
19

20 Karim Elhennawy  
21

22 Charité Universitätsmedizin, Centre for Dental and Craniofacial Sciences  
23

24 Department of Orthodontics, Dentofacial Orthopedics and Pedodontics and  
25 Department of Operative and Preventive Dentistry  
26

27 Aßmannshauer Str. 4-6  
28

29 14197 Berlin, Germany  
30

31 **Phone:** +49 30 450 562594  
32

33 **Fax:** +49 30 450 562952  
34

35 **E-Mail:** [Karim.elhennawy@charite.de](mailto:Karim.elhennawy@charite.de)  
36  
37

38 **Keywords**  
39

40 Systematic review, molar incisor hypomineralization, core outcome set, outcomes,  
41 MIH, prevention, management, intervention  
42  
43  
44

45 **Tables:** 3  
46

47 **Figures:** 4  
48  
49  
50  
51  
52  
53  
54  
55  
56  
57  
58  
59  
60

## Abstract

**Objectives:** Outcome and comparator choice strongly determine the validity and implementation of clinical trial results. We aimed to assess outcome and comparator choice in intervention studies on Molar Incisor Hypomineralization (MIH) using systematic review and social network analysis (SNA).

**Design and data sources:** Medline, Embase, Cochrane Central, Google Scholar, opengrey.eu as well as DRKS.de and Clinicaltrials.gov were searched for MIH intervention studies. The search covered the period from 1980-2019.

**Eligibility criteria:** Clinical single-/multi-arm, controlled/uncontrolled studies reporting on the management of MIH were included. Reported outcomes and comparators were extracted and categorized. SNA was used to evaluate comparator choice and the resulting trial networks.

**Data extraction:** Of the 7979 identified records, 100 were evaluated in full-text and 35 studies (17 randomized controlled trials, 14 prospective and 4 retrospective cohort studies) were included.

**Results:** In total, 2124 patients with a mean age of 11 years (min/max 6/70 years) were included. Outcomes fell in one of 11 different outcome categories: Restoration success, Aesthetic improvement, Pain/ hypersensitivity/ discomfort, Mineral gain, Space management, Anesthesia effectiveness, Preventive success, Efficiency, Quality of life, Gingival and periodontal health, and Patient satisfaction. Comparators were mainly restorative interventions (17 studies), remineralization (3), treatment of hypersensitivity (10), aesthetic interventions (5), and orthodontic interventions (3). Two highly clustered comparator networks emerged; many interventions were not robustly linked to these networks.

**Conclusions:** MIH intervention studies recorded both clinically- and patient-centered outcomes. Core Outcome Set (COS) development should consider these and supplement them with outcomes on, for example, applicability. The high number of compared interventions tested in only few studies and our SNA results implicate that the current evidence may not be robust.

### Strengths and limitations of this study

- Molar incisor hypomineralization (MIH) is a frequent condition. No core outcome set on MIH exists.
- Outcomes and comparators for MIH studies were assessed using a systematic review.
- A network analysis was performed to evaluate the robustness of comparisons.
- The findings of this study will aid in core outcomes definition.
- The available body of evidence is limited and likely not robust.

For peer review only

## Introduction

There is increasing interest in the internal and external validity of clinical studies, as indicated, for example, by their risk of bias<sup>1 2</sup> or their reporting quality<sup>3</sup>. Two aspects that only recently came into the focus, but have an impact on the validity are (1) outcome and (2) comparator choice.

So far, most clinical researchers chose the outcomes based on their understanding of what was relevant or not; the involvement of further stakeholders into outcome choice was seldom considered. This impacts on the relevance of study findings and may limit their applicability. Also, researchers usually collected a range of outcomes, without necessarily reporting all of them later on (selective reporting); mainly as data on outcomes with unwanted findings (which may nevertheless be relevant) can be omitted. The chosen outcomes and outcome measures may further suffer from limited comparability across studies, decreasing the chance to make the best use of clinical studies by synthesizing them. Outcome choice is thus relevant for study validity, applicability, and relevance, and implementation into practice<sup>4-6</sup>.

Comparator choice impacts on the overall usefulness and validity of evidence<sup>7</sup>. Again, usually, most clinical researchers choose the comparators themselves, without necessarily consulting patients or further stakeholders such as insurers, regulators, etc. Comparators relevant to patients, for example, may hence not be evaluated, while other comparators may be over-proportionally employed<sup>8-10</sup>. The resulting gaps in the evidence may mean important data on possibly useful comparators are unavailable. Also, comparisons against placebo or no intervention (in single arm studies) or less effective options (so-called straw men) can lead to overestimation of effectiveness<sup>9-11</sup>. Repeated chain-linked comparisons against less-than-optimal standards were found to significantly distort the totality of evidence<sup>9-11</sup>. Comparator choice is relevant to make clinical research in a specific field useable, applicable, and informative.

The present study assessed outcome and comparator choice in intervention studies on Molar Incisor Hypomineralisation (MIH), a highly prevalent dental developmental disorder with a significant burden for patients and high treatment needs<sup>12</sup>. MIH is characterized by demarcated creamy-white, yellowish-brown or brown lesions with or without posteruptive enamel breakdown and hypersensitivity, affecting the permanent molars with or without additional affection of the incisors<sup>13-15</sup>. The severity of the



1  
2  
3 lesions, the symptomatology of the affected tooth as well as the patient's dental age,  
4 caries risk and expectations need to be considered in the management of MIH <sup>15</sup>.  
5 Dentists often need to employ different treatment strategies when dealing with MIH  
6 patients, including restoring cavities, alleviating pain or improving aesthetics <sup>16, 17</sup>.  
7 Given the broad spectrum of clinical presentations, individual needs and available  
8 treatment modalities, managing MIH is challenging for most practitioners <sup>13-15</sup>.  
9  
10  
11  
12  
13

14 Assessing the outcome and comparator choice in MIH intervention studies seems  
15 warranted. Such an assessment is further useful to inform the development of a Core  
16 Outcome Set (COS) for MIH management and prevention studies. COS are a  
17 minimum set of outcomes that have been agreed in a systematic consensus process  
18 by a diverse group of stakeholders (patients, dentists, researchers, insurance  
19 companies, etc). COS overcome the problem of a possibly limited relevance of chosen  
20 outcomes, the risk of selective reporting and the lack of synthesizability of study  
21 findings <sup>18</sup>. A range of COS development initiatives is currently underway in dentistry  
22 <sup>19-23</sup>.  
23  
24  
25  
26  
27  
28  
29

30 We aimed to review the outcomes used in MIH intervention studies to inform the  
31 development of a COS on MIH. We further aimed to assess the comparators used in  
32 these studies and to analyze the resulting study network. This was done using social  
33 network analysis (SNA), a method for evaluating the relationships between factors in  
34 a network <sup>8</sup>, which has been introduced to dentistry recently <sup>24</sup>. As secondary aim, we  
35 evaluated if studies clearly indicated their primary outcome, if studies used a sample  
36 size estimation based on this outcome, and if studies were registered a priori, as  
37 should be expected.  
38  
39  
40  
41  
42  
43  
44  
45  
46

## 47 **Methods**

48 This review was registered on the Core Outcome Measures in Effectiveness Trials  
49 (COMET) initiative website <sup>1</sup>. In parts, it builds on a previously published review on  
50 MIH management <sup>25</sup>.  
51  
52  
53  
54  
55

### 56 *Search strategy*

57 The following search was adapted for each database:  
58  
59  
60

1  
2  
3 (treatment OR management OR prevention) AND (molar incisor hypomineralisation  
4 OR molar incisor hypomineralization OR mih).

5  
6  
7 Searches were developed and run individually for Medline, Embase, Cochrane  
8 Central, Google Scholar, opengrey.eu as well as DRKS and Clinicaltrials.gov and  
9 cross references were performed without any language restrictions. The search  
10 covered the period from 01.01.1980 to 03.04.2019 (Fig. 1).  
11  
12  
13  
14  
15

### 16 *Data collection*

17  
18  
19 Inclusion criteria: We included all types of clinical studies (retrospective or prospective,  
20 controlled trials or cohort studies) in patients diagnosed with MIH. Note that studies  
21 conducted before 2001 on the condition will not have employed the term “MIH”, and  
22 may have been missed by our search. This, however, was accepted, as without a clear  
23 case definition, other conditions may have been captured by these studies too, without  
24 being able to separate conditions post hoc. Studies reported on prevention and/or  
25 management interventions for MIH teeth. There were no restrictions on setting, time  
26 of follow-up, or patients’ age. Case reports or case series with a sample size of < 10  
27 participants were excluded. No language restriction was set; studies in languages  
28 other than English, German or Arabic (if present) were translated by native speakers.  
29 Selection process: Two authors (FS, KE) screened titles independently and compared  
30 their findings. In case of disagreement, titles were included to obtain full-texts. Full-  
31 texts were assessed independently after de-duplication. In cases of disagreement,  
32 studies were included after consensus was reached through discussion.  
33  
34  
35  
36  
37  
38  
39  
40  
41  
42  
43

44 Data extraction: The following data was extracted duplicatively and independently by  
45 two authors (KE and FS) following calibration using a pilot database:  
46

- 47 • Study details (author name, title, journal, year of publication);
  - 48 • Study characteristics;
    - 49 ○ Study setting (primary or secondary care)
    - 50 ○ Number and age of participants
    - 51 ○ Study type (controlled or uncontrolled, pro- or retrospective)
    - 52 ○ Target condition (MIH lesions on molars, incisors, or both)
    - 53 ○ Number of study arms
    - 54 ○ Interventions compared
- 55  
56  
57  
58  
59  
60

- Follow-up period
- Outcomes assessed, separated for primary and secondary outcome(s).  
An outcome was considered a primary outcome if it was stated as such, or where the report clearly focused on one outcome. If no primary outcome was identifiable or multiple outcomes were reported, these were considered secondary outcomes.
- Outcome measures
  - Sample size estimation (yes/no)
  - Trial registration (yes/no).

### *Data synthesis*

A list of outcomes was compiled and outcomes with different verbatim terms but similar meanings gathered using a single agreed term. Outcomes were grouped within outcome categories; these were refined through group discussion before all outcomes were categorized using the final agreed terms. The final list of outcome categories comprised 11 items; Restoration success, Aesthetic improvement, Pain and hypersensitivity management, Mineral gain, Space management, Anesthesia effectiveness, Preventive success, Efficiency, Quality of life, Gingival and Periodontal health, and Patient satisfaction. The use of different outcome categories was analyzed via descriptive statistics. Exemplary outcomes and outcome measures were allocated to one of these outcome categories by discussion and agreement of two authors (KE and FS). Where there was disagreement, a consensus was achieved through discussion with all authors.

A list of comparators was compiled and comparators were grouped into agreed categories. The granularity of these categories allowed to capture specific comparators (like “glass ionomer cement restoration”) while grouping similar comparators in the same category (e.g. different cement brands). Comparator choice was analyzed via SNA. In SNA, nodes (termed ‘vertices’) are formed by comparators and are connected by edges (comparisons made within the same trial). In a graphical analysis, the node diameter represents the number of comparator arms forming the node and thickness of edges represents the number of direct comparisons. We performed separate analyses (and graphic representations) for studies on MIH in

1  
2  
3 molars versus incisors. Statistical analysis included the assessment of the degree  
4 (average number of comparators per node) and the clustering coefficient (values of  
5 one indicate that all possible connections were made, while values of 0 indicate that  
6 only the minimum number of connections were made) <sup>26-28</sup>. Statistical analysis was  
7 only performed for the main network in each sub-analysis (molars; incisors). The  
8 Python package NetworkX was used.  
9  
10  
11  
12  
13  
14  
15

### 16 *Patient and public involvement*

17 Patients were not involved in this study at this point but will be during the core  
18 outcomes definition.  
19  
20  
21  
22

## 23 **Results**

### 24 *Included studies*

25 The database search yielded 7979 records; 4106 remained after de-duplication. There  
26 were 100 potentially relevant articles and the full texts of all these 100 articles were  
27 located (100% retrieval rate); 35 met the inclusion criteria and were included (Fig. 1).  
28  
29  
30  
31  
32  
33  
34  
35

### 36 *Characteristics of included trials*

37 Of the 35 included studies, all (100%) were conducted in a secondary care setting  
38 (hospital or university). The total number of participants was 2124; per study, a mean  
39 of 60 (range 12 – 300) participants were included. Only children (mean age < 12 years)  
40 were included in 33 included reports (94%). Only one (3%) study reported on adults  
41 (mean age 33 years). In two other publications (6%) it was not possible to determine  
42 the age of the participants. There were 10 (29%) one-arm studies, 18 (51%) two-arm  
43 studies, 3 (9%) three-arm studies, and 4 (11%) multi-arm studies. Further details on  
44 the included studies can be found in Table 1.  
45  
46  
47  
48  
49  
50  
51  
52  
53  
54

### 55 *Outcome choice*

56 In total, 11 outcome categories were deduced from the included studies (Fig. 2, Table  
57 2). The most frequent specific categories were “Restoration success” and “Pain/  
58  
59  
60

1  
2  
3 discomfort/ hypersensitivity”; with 17 (49%) and 12 (34%) studies reporting them,  
4 respectively. The next most common were “Quality of life” and “Efficiency” (each 5  
5 studies, 14%); “Aesthetic improvement” and “Preventive success” (4 studies, 11%);  
6  
7 “Mineral gain”, “Space management” and “Anesthesia effectiveness” (each 3 studies,  
8 9%); “Patient satisfaction” and “Gingival and periodontal  
9 health” (each 2 studies, or 6%). Outcome categories that have increased in use (from  
10 2000-2009 to 2010-2018) included “Aesthetic improvement”, “Mineral gain”,  
11 “Efficiency”, and “Gingival and periodontal health”.  
12  
13  
14  
15  
16  
17  
18  
19

### 20 *Findings for molars*

21  
22 For molars, 10 outcome categories were identified from the included studies. Those  
23 were: “Restoration success” with a total of 17/28 studies reporting on it (15/17 as  
24 primary outcome and 2/17 as secondary outcome); “Pain/discomfort/hypersensitivity”  
25 with a total of 12/28 studies reporting on it (4/12 as primary outcome and 8/11 as  
26 secondary outcome); “Quality of life” with a total of 5/28 studies reporting on it (2/5 as  
27 primary outcome and 3/5 as secondary outcome); “Efficiency” with a total of 5/28  
28 studies reporting on it (1/5 as primary outcome and 4/5 as secondary outcome);  
29 “Preventive success” with a total of 4/28 studies reporting on it (3/4 as primary  
30 outcome and 1/4 as secondary outcome); “Anesthesia effectiveness” with a total of  
31 3/28 studies reporting on it (2/3 as primary outcome and 1/3 as secondary outcome);  
32 “Space management” with a total of 3/28 studies reporting on it (1/3 as primary  
33 outcome and 2/3 as secondary outcome); “Mineral gain” with a total of 2/28 studies  
34 reporting on it (all as primary outcome); “Gingival and periodontal health” with a total  
35 of 2/28 studies reporting on it (1/2 as primary outcome and 1/2 as secondary outcome);  
36 “Patient satisfaction” with a total of 2/28 studies reporting on it (all as secondary  
37 outcome).  
38  
39  
40  
41  
42  
43  
44  
45  
46  
47  
48  
49  
50  
51  
52

### 53 *Findings for incisors*

54  
55 For incisors, only four outcome categories were identified from the included studies.  
56 Those were: “Aesthetic improvement” with a total of 4/7 studies reporting on it (all as  
57 primary outcome); “Pain/discomfort/hypersensitivity” with a total of 1/7 study reporting  
58  
59  
60

1  
2  
3 on it (as primary outcome); “Quality of life” with a total of 1/7 study reporting on it (as  
4 primary outcome); “Mineral gain” with a total of 1/7 study reporting on it (as primary  
5 outcome).  
6  
7  
8  
9

### 10 11 *Comparator choice*

12  
13 Two separate analyses on comparator choice were performed; one for studies on  
14 molars and one on incisors. In both groups, a loosely connected main network and  
15 several further, unconnected networks or comparators were present, indicating poor  
16 connectivity between comparators (Figs. 3 and 4). Certain comparators were more  
17 frequently chosen than others.  
18  
19

20  
21  
22 In molars (Fig. 3), many studies compared different restorative strategies, for example,  
23 composite (with different brands also tested against each other), metal, ceramic or  
24 cement restorations. Further comparisons, non-connected to this main (restorative)  
25 network, involved caries preventive interventions, management of hypersensitivity,  
26 and cavity preparation and condition techniques. The mean degree of the main,  
27 restorative network was 5.9, with a density of 0.49. The cluster coefficient (which  
28 ranges from 0 – no clustering – to 1 – maximum clustering) was 0.76, indicating that  
29 there was significant clustering, with certain comparators being compared with each  
30 other (in “cliques”), while other possible comparisons (against comparators outside of  
31 these cliques) not having been made.  
32  
33  
34  
35  
36  
37  
38  
39

40 In incisors (Fig. 4), a main network, comparing different remineralization strategies,  
41 emerged, with two further networks and two further, non-connected comparators on  
42 aesthetic management of MIH. The mean degree of the main (remineralization)  
43 network was 5, with a density of 1.0. The cluster coefficient was 1.0, indicating that  
44 there were “cliques” of comparators present, with comparators being mainly compared  
45 within and not across these cliques.  
46  
47  
48  
49  
50  
51  
52  
53  
54

### 55 *Primary outcome and sample size calculation*

56  
57 Primary outcomes could be identified in all 35 (100%) reports (Table 3). Throughout  
58 all years (2000 to 2019), “Restoration success” was the most frequently assessed  
59  
60

1  
2  
3 primary outcome (17/35). Information on sample size calculation was provided in 7  
4 (20%) reports, all but one being published between 2016 and 2019. Of these 7 reports,  
5 5 (71%) related this calculation to the primary outcome.  
6  
7  
8  
9  
10

### 11 *Trial registration reporting*

12  
13 Only 10 (29%) of all articles reported a trial registration <sup>29</sup>. In the 10 years following  
14 the publication of the first CONSORT statement (2001-2010), not a single report  
15 included a trial registration. Following the publication of the second CONSORT  
16 statement (2011-2019), this increased to 29%.  
17  
18  
19  
20  
21  
22

## 23 **Discussion**

24  
25 This systematic review assessed outcome and comparator choice in MIH intervention  
26 studies, and their change over time. We found that studies recorded a large range of  
27 outcomes, especially when considering the limited number of studies overall, and that  
28 the diversity of these outcomes is increasing. This is reassuring, and the findings of  
29 this review are helpful to develop a COS. We also found that despite the low number  
30 of studies available, a large range of different interventions was tested, which led to  
31 the occurrence of segregated networks. Resulting from this clustering and the fact that  
32 most interventions were not well compared against alternatives, the current body of  
33 evidence on MIH interventions is likely not robust.  
34  
35  
36  
37  
38  
39  
40

41 The outcomes used in MIH intervention studies focused on two main areas; restoration  
42 success (measured via the USPHS criteria or similar tools) and pain/ discomfort/  
43 hypersensitivity (measured via scales like the Visual analog scale or the Schiff Cold  
44 Air Sensitivity Scale). Combined, these two areas accounted for the majority of primary  
45 and all reported outcomes. Both restoring MIH teeth and managing pain can be  
46 assumed to be the major difficulties dentists face when treating MIH. Research has  
47 shown that MIH-affected children receive and need more dental treatment compared  
48 to unaffected children <sup>30-35</sup>. Also already restored MIH-molars remain within short re-  
49 treatment cycles <sup>30</sup>. The porous nature of MIH enamel and the presence of post  
50 eruptive enamel breakdown leads to the presence of hypersensitivity and pain, which  
51 are often the patients' chief complaints and affect their quality of life. They also  
52  
53  
54  
55  
56  
57  
58  
59  
60

1  
2  
3 increase the risk of dental fear and anxiety <sup>15 36-38</sup>. Overall, the focus on how to best  
4 restore these teeth and alleviate pain seems justified.

5  
6 Nevertheless, the use of other outcome categories like quality of life or efficiency  
7 appears to be growing, reflecting an ongoing shift to patient-centered care (and  
8 research) and the increasing relevance of health economics in today's resource-  
9 limited healthcare settings. We will, in the next stage of our COS development,  
10 suggest these outcomes to be included in the COS on MIH intervention studies, and  
11 will seek stakeholder consensus on their inclusion (or not).  
12  
13  
14  
15  
16

17 We also investigated further outcome-related aspects in the included studies. For  
18 example, trial registration, one of the recommendations of the CONSORT statement  
19 <sup>39 40</sup>, was found in only 10 studies (and even very recent studies did not commonly  
20 report on this). While such registration may be seen as a prerogative of controlled  
21 trials, also single-arm prospective trials should clearly state what is to be investigated  
22 using which methods and tools in what population before commencing the study. This  
23 does not seem to be the case. Registration would help to reduce selective outcome  
24 reporting and could also assist in improving reporting standards (and general  
25 methodology) in MIH intervention studies.  
26  
27  
28  
29  
30  
31  
32

33 Also, of the 35 reports, only 7 studies reported a sample size calculation, and of these,  
34 only 5 related this to the primary outcome. Again, while such calculations are mainly  
35 demanded for controlled prospective trials, researchers should have a rational basis  
36 for calculating the number of participants needed in any study (regardless of its  
37 design), be it to ascertain that differences between the interventions can be detected  
38 with a planned level of statistical confidence or be it to reduce statistical noise  
39 (allowing somewhat firm conclusions). Sample size calculation is a key  
40 recommendation in the CONSORT statement, published in 2001 <sup>40</sup> and revised in  
41 2010 <sup>39</sup>. It was promising to find that, since this revision, more publications reported  
42 on a sample size calculation (while the overall number remained low).  
43  
44  
45  
46  
47  
48  
49  
50

51 Our network analysis found that most comparisons in MIH trials included few, favored  
52 comparators; many possible comparisons were never made, and some comparators  
53 were not at all compared against alternatives. Moreover, and understandable,  
54 comparators focusing on specific indications (managing pain, restoring cavities,  
55 improving aesthetics) were connected within, not between these indications. Overall,  
56 the information emerging from such poorly connected networks with regards to the  
57  
58  
59  
60



1  
2  
3 relative efficacy of the interventions (answering the question of which intervention is  
4 most suited for a specific therapeutic goal) is likely not robust. The small sample sizes  
5 in most studies further add to the limited robustness of the existing evidence. Overall,  
6 the relatively “young” field of MIH research has so far not accrued sufficiently robust  
7 data which allows strong recommendations for clinicians.  
8  
9

10  
11  
12 This study has a number of limitations. First, the effort to improve COS methodology  
13 is ongoing, and our review used only one of several available strategies suggested for  
14 COS developers. For example, it seems that to reach saturation on outcomes and  
15 outcome categories, it may not be necessary to search multiple databases <sup>41</sup>, while  
16 we did so, also as this review was an update of a previous one and we aimed to apply  
17 the same methodology. Second, developing outcome categories and assigning  
18 specific verbatim outcomes to these categories is challenging <sup>21</sup>, often as outcomes  
19 are either inter-related or composites, capturing different outcome categories <sup>42</sup>. While  
20 there is no acknowledged MIH outcome classification system, it is clear that alternative  
21 classifications may have resulted in changes to the granularity and focus of the results.  
22 Third, researchers tend to publish multiple reports from the same clinical trial <sup>43</sup>. This  
23 can be necessary to report on the dataset at different time points or to report on  
24 multiple analyses. Data is then divided and spread across multiple publications, which  
25 makes linking or summarizing these articles very difficult. We assume to have  
26 captured all articles given that the field is limited. Last, in order to limit selective  
27 outcome bias and in the attempt of including the most recent trials, registries were  
28 searched in our study, too. This, however, has its limitations, since there are often  
29 incomplete or unclear registrations, and we were only limitedly able to extract data.  
30  
31  
32  
33  
34  
35  
36  
37  
38  
39  
40  
41  
42  
43  
44  
45  
46

## 47 **Conclusions**

48  
49 Outcomes reported in interventional trials for the management and prevention of MIH  
50 focused on the performance of restorative materials or and the management of pain  
51 and hypersensitivity associated with MIH-affected teeth. Outcomes related to oral-  
52 health related quality of life and economics have grown in use and are likely to be  
53 important in the future. Patient-reported or patient-centered outcomes were rarely  
54 reported. COS development should include these and may supplement them with new  
55 outcomes, e.g. on applicability. The high number of compared interventions tested in  
56  
57  
58  
59  
60

1  
2  
3 only a few studies and our SNA results implicate that current evidence may not be  
4 robust.  
5  
6  
7  
8  
9  
10  
11  
12  
13  
14  
15  
16  
17  
18  
19  
20  
21  
22  
23  
24  
25  
26  
27  
28  
29  
30  
31  
32  
33  
34  
35  
36  
37  
38  
39  
40  
41  
42  
43  
44  
45  
46  
47  
48  
49  
50  
51  
52  
53  
54  
55  
56  
57  
58  
59  
60

For peer review only

**Trial status (Registration):**

COMET initiative online <http://www.comet-initiative.org/studies/details/1155> <sup>1</sup>

**Competing interests**

None declared

**Funding**

No funding was acquired.

**Ethical approval**

Not applicable.

**Author contributions**

The study was conceived by KE and FS. KE and JK analyzed, interpreted the data.

KE, P-G J-B and FS wrote the manuscript. All authors read and approved the

manuscript.

**Transparency declaration**

The lead author\* affirms that this manuscript is an honest, accurate, and transparent account of the study being reported; that no important aspects of the study have been omitted; and that any discrepancies from the study as planned (and, if relevant, registered) have been explained.

**Data availability statement**

All data relevant to the study are included in the article or uploaded as supplementary information.

## References

1. COMET. comet - initiative. org, Accessed 23 Jan 2017.
2. Higgins JPT, Altman DG, Gøtzsche PC, et al. The Cochrane Collaboration's tool for assessing risk of bias in randomised trials. *BMJ* 2011;343:d5928.
3. Schulz K, Altman DG, Moher D, et al. CONSORT 2010 Statement: updated guidelines for reporting parallel group randomised trials. *BMC Medicine* 2010;8(1):18.
4. Prinsen CA, Vohra S, Rose MR, et al. Core Outcome Measures in Effectiveness Trials (COMET) initiative: protocol for an international Delphi study to achieve consensus on how to select outcome measurement instruments for outcomes included in a 'core outcome set'. *Trials* 2014;15(1):247.
5. Chiarotto A, Ostelo RW, Turk DC, et al. Core outcome sets for research and clinical practice. *Brazilian journal of physical therapy* 2017;21(2):77-84. doi: 10.1016/j.bjpt.2017.03.001 [published Online First: 2017/05/04]
6. Levey C, Innes N, Schwendicke F, et al. Outcomes in randomised controlled trials in prevention and management of carious lesions: a systematic review. *Trials* 2017;18(1):515. doi: 10.1186/s13063-017-2256-1 [published Online First: 2017/11/04]
7. Ioannidis JP, Greenland S, Hlatky MA, et al. Increasing value and reducing waste in research design, conduct, and analysis. *Lancet* 2014;383(9912):166-75. doi: 10.1016/s0140-6736(13)62227-8 [published Online First: 2014/01/15]
8. Rizos EC, Salanti G, Kontoyiannis DP, et al. Homophily and co-occurrence patterns shape randomized trials agendas: illustration in antifungal agents. *Journal of clinical epidemiology* 2011;64(8):830-42. doi: 10.1016/j.jclinepi.2010.11.017 [published Online First: 2011/03/18]
9. Salanti G, Higgins JP, Ades AE, et al. Evaluation of networks of randomized trials. *Statistical methods in medical research* 2008;17(3):279-301. doi: 10.1177/0962280207080643 [published Online First: 2007/10/11]
10. Salanti G, Kavvoura FK, Ioannidis JP. Exploring the geometry of treatment networks. *Annals of internal medicine* 2008;148(7):544-53. [published Online First: 2008/04/02]
11. Salanti G. Indirect and mixed-treatment comparison, network, or multiple-treatments meta-analysis: many names, many benefits, many concerns for the

- 1  
2  
3 next generation evidence synthesis tool. *Research synthesis methods*  
4 2012;3(2):80-97. doi: 10.1002/jrsm.1037  
5  
6  
7 12. Schwendicke F, Elhennawy K, Reda S, et al. Global burden of molar incisor  
8 hypomineralization. *Journal of dentistry* 2018;68:10-18. doi:  
9 10.1016/j.jdent.2017.12.002 [published Online First: 2017/12/10]  
10  
11  
12 13. Weerheijm KL, Duggal M, Mejare I, et al. Judgement criteria for molar incisor  
13 hypomineralisation (MIH) in epidemiologic studies: a summary of the European  
14 meeting on MIH held in Athens, 2003. *European journal of paediatric dentistry: official journal of European Academy of Paediatric Dentistry* 2003;4(3):110-3.  
15 [published Online First: 2003/10/08]  
16  
17  
18 14. Weerheijm KL. Molar incisor hypomineralization (MIH): clinical presentation,  
19 aetiology and management. *Dental update* 2004;31(1):9-12. [published Online  
20 First: 2004/03/06]  
21  
22  
23 15. Lygidakis NA, Wong F, Jalevik B, et al. Best clinical practice Guidance for clinicians  
24 dealing with children presenting with Molar-Incisor-Hypomineralisation (MIH):  
25 An EAPD Policy Document. *European archives of paediatric dentistry: official journal of the European Academy of Paediatric Dentistry* 2010;11(2):75-81.  
26 [published Online First: 2010/04/21]  
27  
28  
29 16. Neves AB, Americano GCA, Soares DV, et al. Breakdown of demarcated opacities  
30 related to molar-incisor hypomineralization: a longitudinal study. *Clinical oral investigations* 2018. doi: 10.1007/s00784-018-2479-x [published Online First:  
31 2018/05/05]  
32  
33  
34 17. Steffen R, Kramer N, Bekes K. The Würzburg MIH concept: the MIH treatment  
35 need index (MIH TNI): A new index to assess and plan treatment in patients  
36 with molar incisor hypomineralisation (MIH). *European archives of paediatric dentistry: official journal of the European Academy of Paediatric Dentistry*  
37 2017;18(5):355-61. doi: 10.1007/s40368-017-0301-0 [published Online First:  
38 2017/09/16]  
39  
40  
41 18. Tugwell P, Boers M, Brooks P, et al. OMERACT: an international initiative to  
42 improve outcome measurement in rheumatology. *Trials* 2007;8:38. doi:  
43 10.1186/1745-6215-8-38  
44  
45  
46 19. Innes NP, Schwendicke F, Lamont T. How do we create, and improve, the  
47 evidence base? *Br Dent J* 2016;220(12):651-5. doi: 10.1038/sj.bdj.2016.451  
48  
49  
50  
51  
52  
53  
54  
55  
56  
57  
58  
59  
60

- 1  
2  
3 20. Lamont T, Schwendicke F, Innes N. Why we need a core outcome set for trials of  
4 interventions for prevention and management of caries. *Evidence-based*  
5 *dentistry* 2015;16(3):66-8. doi: 10.1038/sj.ebd.6401109 [published Online First:  
6 2015/10/24]  
7  
8  
9
- 10 21. Fleming PS, Koletsi D, O'Brien K, et al. Are dental researchers asking patient-  
11 important questions? A scoping review. *Journal of dentistry* 2016;49:9-13. doi:  
12 10.1016/j.jdent.2016.04.002 [published Online First: 2016/04/14]  
13  
14
- 15 22. Hancocks S. Asking the right questions. *British dental journal* 2016;221(2):47. doi:  
16 10.1038/sj.bdj.2016.511 [published Online First: 2016/07/23]  
17  
18
- 19 23. Smail-Faugeron V, Fron Chabouis H, Durieux P, et al. Development of a core set  
20 of outcomes for randomized controlled trials with multiple outcomes--example  
21 of pulp treatments of primary teeth for extensive decay in children. *PLoS One*  
22 2013;8(1):e51908. doi: 10.1371/journal.pone.0051908  
23  
24
- 25 24. Schwendicke F, Blunck U, Paris S, et al. Choice of comparator in restorative trials:  
26 A network analysis. *Dental materials: official publication of the Academy of*  
27 *Dental Materials* 2015;31(12):1502-9. doi: 10.1016/j.dental.2015.09.021  
28  
29
- 30 25. Elhennawy K, Schwendicke F. Managing molar-incisor hypomineralization: A  
31 systematic review. *Journal of dentistry* 2016;55:16-24. doi:  
32 10.1016/j.jdent.2016.09.012  
33  
34  
35
- 36 26. Jackson M. Social and Economic Networks. Princeton: Princeton University Press  
37 2008.  
38
- 39 27. Mahony H, Tsalatsanis A, Kumar A, et al. Evolution of treatment regimens in  
40 multiple myeloma: a social network analysis. *PloS one* 2014;9(8):e104555. doi:  
41 10.1371/journal.pone.0104555 [published Online First: 2014/08/15]  
42  
43  
44
- 45 28. Valente T. Social networks and health: models, methods, and applications. New  
46 York: Oxford University Press 2010.  
47
- 48 29. Schulz KF, Altman DG, Moher D, et al. CONSORT 2010 Statement: updated  
49 guidelines for reporting parallel group randomized trials. *Open Med*  
50 2010;4(1):e60-8.  
51  
52
- 53 30. Leppaniemi A, Lukinmaa PL, Alaluusua S. Nonfluoride hypomineralizations in the  
54 permanent first molars and their impact on the treatment need. *Caries research*  
55 2001;35(1):36-40. doi: 47428 [published Online First: 2000/12/23]  
56  
57
- 58 31. Jalevik B, Klingberg GA. Dental treatment, dental fear and behaviour management  
59 problems in children with severe enamel hypomineralization of their permanent  
60

- 1  
2  
3 first molars. *International journal of paediatric dentistry / the British Paedodontic*  
4 *Society [and] the International Association of Dentistry for Children*  
5 2002;12(1):24-32. [published Online First: 2002/02/21]  
6  
7  
8  
9 32. Kotsanos N, Kaklamanos EG, Arapostathis K. Treatment management of first  
10 permanent molars in children with molar-incisor hypomineralisation. *European*  
11 *journal of paediatric dentistry: official journal of European Academy of*  
12 *Paediatric Dentistry* 2005;6(4):179-84.  
13  
14  
15 33. Mejare I, Bergman E, Grindefjord M. Hypomineralized molars and incisors of  
16 unknown origin: treatment outcome at age 18 years. *International journal of*  
17 *paediatric dentistry / the British Paedodontic Society [and] the International*  
18 *Association of Dentistry for Children* 2005;15(1):20-8. doi: 10.1111/j.1365-  
19 263X.2005.00599.x [published Online First: 2005/01/25]  
20  
21  
22  
23  
24 34. Chawla N, Messer LB, Silva M. Clinical studies on molar-incisor-  
25 hypomineralisation part 1: distribution and putative associations. *European*  
26 *archives of paediatric dentistry: official journal of the European Academy of*  
27 *Paediatric Dentistry* 2008;9(4):180-90. [published Online First: 2008/12/05]  
28  
29  
30  
31 35. Jalevik B, Klingberg G. Treatment outcomes and dental anxiety in 18-year-olds  
32 with MIH, comparisons with healthy controls - a longitudinal study. *International*  
33 *journal of paediatric dentistry / the British Paedodontic Society [and] the*  
34 *International Association of Dentistry for Children* 2012;22(2):85-91. doi:  
35 10.1111/j.1365-263X.2011.01161.x [published Online First: 2011/07/26]  
36  
37  
38  
39 36. Weerheijm KL, Jalevik B, Alaluusua S. Molar-incisor hypomineralisation. *Caries*  
40 *research* 2001;35(5):390-1. doi: 47479 [published Online First: 2001/10/20]  
41  
42  
43 37. Rodd HD, Morgan CR, Day PF, et al. Pulpal expression of TRPV1 in molar incisor  
44 hypomineralisation. *European archives of paediatric dentistry : official journal*  
45 *of the European Academy of Paediatric Dentistry* 2007;8(4):184-8. [published  
46 Online First: 2007/12/14]  
47  
48  
49 38. Fagrell TG, Lingstrom P, Olsson S, et al. Bacterial invasion of dentinal tubules  
50 beneath apparently intact but hypomineralized enamel in molar teeth with molar  
51 incisor hypomineralization. *International journal of paediatric dentistry / the*  
52 *British Paedodontic Society [and] the International Association of Dentistry for*  
53 *Children* 2008;18(5):333-40. doi: 10.1111/j.1365-263X.2007.00908.x  
54  
55  
56  
57  
58  
59  
60

- 1  
2  
3 39. Moher D, Hopewell S, Schulz KF, et al. CONSORT 2010 explanation and  
4 elaboration: updated guidelines for reporting parallel group randomised trials.  
5 *BMJ* 2010;340:c869. doi: 10.1136/bmj.c869  
6  
7
- 8 40. Moher D, Schulz KF, Altman DG. The CONSORT statement: revised  
9 recommendations for improving the quality of reports of parallel-group  
10 randomised trials. *Lancet* 2001;357(9263):1191-4.  
11  
12
- 13 41. Gargon E, Williamson PR, Clarke M. Collating the knowledge base for core  
14 outcome set development: developing and appraising the search strategy for a  
15 systematic review. *BMC medical research methodology* 2015;15:26. doi:  
16 10.1186/s12874-015-0019-9 [published Online First: 2015/04/19]  
17  
18
- 19 42. Echevarria C, Sinha IP. Heterogeneity in the measurement and reporting of  
20 outcomes in studies of electronic cigarette use in adolescents: a systematic  
21 analysis of observational studies. *Tob Control* 2016 doi:  
22 10.1136/tobaccocontrol-2015-052881  
23  
24
- 25 43. Ebrahim S, Montoya L, Kamal El Din M, et al. Randomized trials are frequently  
26 fragmented in multiple secondary publications. *Journal of clinical epidemiology*  
27 2016;79:130-39. doi: 10.1016/j.jclinepi.2016.05.016 [published Online First:  
28 2016/07/09]  
29  
30
- 31 44. Koch MJ, Garcia-Godoy F. The clinical performance of laboratory-fabricated  
32 crowns placed on first permanent molars with developmental defects. *Journal*  
33 *of the American Dental Association (1939)* 2000;131(9):1285-90.  
34  
35
- 36 45. Lygidakis NA, Chaliasou A, Siounas G. Evaluation of composite restorations in  
37 hypomineralised permanent molars: a four year clinical study. *European journal*  
38 *of paediatric dentistry: official journal of European Academy of Paediatric*  
39 *Dentistry* 2003;4(3):143-8. [published Online First: 2003/10/08]  
40  
41
- 42 46. Zagdwon AM, Fayle SA, Pollard MA. A prospective clinical trial comparing  
43 preformed metal crowns and cast restorations for defective first permanent  
44 molars. *European journal of paediatric dentistry: official journal of European*  
45 *Academy of Paediatric Dentistry* 2003;4(3):138-42. [published Online First:  
46 2003/10/08]  
47  
48
- 49 47. Jalevik B, Møller M. Evaluation of spontaneous space closure and development of  
50 permanent dentition after extraction of hypomineralized permanent first molars.  
51 *International journal of paediatric dentistry / the British Paedodontic Society*  
52  
53  
54  
55  
56  
57  
58  
59  
60



- 1  
2  
3 [and] the International Association of Dentistry for Children 2007;17(5):328-35.  
4 doi: 10.1111/j.1365-263X.2007.00849.x [published Online First: 2007/08/09]  
5  
6  
7 48. Lygidakis NA, Dimou G, Stamataki E. Retention of fissure sealants using two  
8 different methods of application in teeth with hypomineralised molars (MIH): a  
9 4 year clinical study. *European archives of paediatric dentistry: official journal*  
10 *of the European Academy of Paediatric Dentistry* 2009;10(4):223-6. [published  
11 Online First: 2009/12/10]  
12  
13  
14  
15 49. Baroni C, Marchionni S. MIH supplementation strategies: prospective clinical and  
16 laboratory trial. *Journal of dental research* 2011;90(3):371-6. doi:  
17 10.1177/0022034510388036 [published Online First: 2010/12/15]  
18  
19  
20  
21 50. Gaardmand E, Poulsen S, Haubek D. Pilot study of minimally invasive cast  
22 adhesive copings for early restoration of hypomineralised first permanent  
23 molars with post-eruptive breakdown. *European archives of paediatric*  
24 *dentistry: official journal of the European Academy of Paediatric Dentistry*  
25 2013;14(1):35-9. doi: 10.1007/s40368-012-0002-7 [published Online First:  
26 2013/03/28]  
27  
28  
29  
30  
31 51. Cabasse C, Marie-Cousin A, Huet A, et al. Computer-assisted intraosseous  
32 anaesthesia for molar and incisor hypomineralisation teeth. A preliminary study.  
33 *Odonto-stomatologie tropicale = Tropical dental journal* 2015;38(149):5-9.  
34 [published Online First: 2015/06/11]  
35  
36  
37  
38 52. Fragelli CM, Souza JF, Jeremias F, et al. Molar incisor hypomineralization (MIH):  
39 conservative treatment management to restore affected teeth. *Brazilian oral*  
40 *research* 2015;29 doi: 10.1590/1807-3107BOR-2015.vol29.0076 [published  
41 Online First: 2015/06/18]  
42  
43  
44  
45 53. Bekes K, Heinzelmann K, Lettner S, et al. Efficacy of desensitizing products  
46 containing 8% arginine and calcium carbonate for hypersensitivity relief in MIH-  
47 affected molars: an 8-week clinical study. *Clinical oral investigations* 2016 doi:  
48 10.1007/s00784-016-2024-8 [published Online First: 2016/12/23]  
49  
50  
51  
52 54. Bakkal M, Abbasoglu Z, Kargul B. The Effect of Casein Phosphopeptide-  
53 Amorphous Calcium Phosphate on Molar-Incisor Hypomineralisation: A Pilot  
54 Study. *Oral health & preventive dentistry* 2017;15(2):163-67. doi:  
55 10.3290/j.ohpd.a37928 [published Online First: 2017/03/23]  
56  
57  
58  
59 55. de Souza JF, Fragelli CB, Jeremias F, et al. Eighteen-month clinical performance  
60 of composite resin restorations with two different adhesive systems for molars

- 1  
2  
3 affected by molar incisor hypomineralization. *Clinical oral investigations*  
4 2017;21(5):1725-33. doi: 10.1007/s00784-016-1968-z [published Online First:  
5 2016/10/16]  
6  
7  
8  
9 56. Fragelli CMB, Souza JF, Bussaneli DG, et al. Survival of sealants in molars  
10 affected by molar-incisor hypomineralization: 18-month follow-up. *Brazilian oral*  
11 *research* 2017;31:e30. doi: 10.1590/1807-3107BOR-2017.vol31.0030  
12 [published Online First: 2017/05/11]  
13  
14  
15 57. Sonmez H, Saat S. A Clinical Evaluation of Deproteinization and Different Cavity  
16 Designs on Resin Restoration Performance in MIH-Affected Molars: Two-Year  
17 Results. *The Journal of clinical pediatric dentistry* 2017;41(5):336-42. doi:  
18 10.17796/1053-4628-41.5.336 [published Online First: 2017/09/06]  
19  
20  
21  
22 58. Dixit UB, Joshi AV. Efficacy of Intraosseous Local Anesthesia for Restorative  
23 Procedures in Molar Incisor Hypomineralization-Affected Teeth in Children.  
24 *Contemporary clinical dentistry* 2018;9(Suppl 2):S272-S77. doi:  
25 10.4103/ccd.ccd\_252\_18 [published Online First: 2018/10/09]  
26  
27  
28  
29 59. Folayan MO, Oyedele TA, Oziegbe E. Time expended on managing molar incisor  
30 hypomineralization in a pediatric dental clinic in Nigeria. *Brazilian oral research*  
31 2018;32:e79. doi: 10.1590/1807-3107bor-2018.vol32.0079 [published Online  
32 First: 2018/08/09]  
33  
34  
35  
36 60. Grossi JA, Cabral RN, Ribeiro APD, et al. Glass hybrid restorations as an  
37 alternative for restoring hypomineralized molars in the ART model. *BMC oral*  
38 *health* 2018;18(1):65. doi: 10.1186/s12903-018-0528-0 [published Online First:  
39 2018/04/20]  
40  
41  
42  
43 61. Koleventi A, Sakellari D, Arapostathis KN, et al. Periodontal Impact of Preformed  
44 Metal Crowns on Permanent Molars of Children and Adolescents: A Pilot Study.  
45 *Pediatric dentistry* 2018;40(2):117-21. [published Online First: 2018/04/18]  
46  
47  
48 62. Pasini M, Giuca MR, Scatena M, et al. Molar incisor hypomineralization treatment  
49 with casein phosphopeptide and amorphous calcium phosphate in children.  
50 *Minerva stomatologica* 2018;67(1):20-25. doi: 10.23736/s0026-  
51 4970.17.04086-9 [published Online First: 2017/10/05]  
52  
53  
54  
55 63. Dhareula A, Goyal A, Gauba K, et al. A clinical and radiographic investigation  
56 comparing the efficacy of cast metal and indirect resin onlays in rehabilitation  
57 of permanent first molars affected with severe molar incisor hypomineralisation  
58 (MIH): a 36-month randomised controlled clinical trial. *European archives of*  
59  
60

- 1  
2  
3  
4  
5  
6  
7  
8  
9  
10  
11  
12  
13  
14  
15  
16  
17  
18  
19  
20  
21  
22  
23  
24  
25  
26  
27  
28  
29  
30  
31  
32  
33  
34  
35  
36  
37  
38  
39  
40  
41  
42  
43  
44  
45  
46  
47  
48  
49  
50  
51  
52  
53  
54  
55  
56  
57  
58  
59  
60
- paediatric dentistry: official journal of the European Academy of Paediatric Dentistry* 2019 doi: 10.1007/s40368-019-00430-y [published Online First: 2019/03/20]
64. Wong FS, Winter GB. Effectiveness of microabrasion technique for improvement of dental aesthetics. *British dental journal* 2002;193(3):155-8. doi: 10.1038/sj.bdj.4801511a [published Online First: 2002/09/06]
65. Ozgul BM, Saat S, Sonmez H, et al. Clinical evaluation of desensitizing treatment for incisor teeth affected by molar-incisor hypomineralization. *The Journal of clinical paediatric dentistry* 2013;38(2):101-5. [published Online First: 2013/01/01]
66. Sheoran N, Garg S, Damle SG, et al. Esthetic management of developmental enamel opacities in young permanent maxillary incisors with two microabrasion techniques--a split mouth study. *Journal of esthetic and restorative dentistry: official publication of the American Academy of Esthetic Dentistry [et al]* 2014;26(5):345-52. doi: 10.1111/jerd.12096 [published Online First: 2014/03/05]
67. Restrepo M, Jeremias F, Santos-Pinto L, et al. Effect of Fluoride Varnish on Enamel Remineralization in Anterior Teeth with Molar Incisor Hypomineralization. *The Journal of clinical pediatric dentistry* 2016;40(3):207-10. doi: 10.17796/1053-4628-40.3.207 [published Online First: 2016/07/30]
68. Bhandari R, Thakur S, Singhal P, et al. Concealment effect of resin infiltration on incisor of Grade I molar incisor hypomineralization patients: An in vivo study. *Journal of conservative dentistry: JCD* 2018;21(4):450-54. doi: 10.4103/jcd.Jcd\_61\_18 [published Online First: 2018/08/21]
69. Hasmun N, Lawson J, Vettore MV, et al. Change in Oral Health-Related Quality of Life Following Minimally Invasive Aesthetic Treatment for Children with Molar Incisor Hypomineralisation: A Prospective Study. *Dentistry journal* 2018;6(4) doi: 10.3390/dj6040061 [published Online First: 2018/11/06]

**Table 1.** Characteristics of included studies (n=35). Studies were separated according to target condition (MIH in molars or incisors), and ordered chronologically.

| Author                              | Year | Setting | N part. | Age   | Study type | Follow-up (months) | Trial reg. | No. of Arms | P cal. |
|-------------------------------------|------|---------|---------|-------|------------|--------------------|------------|-------------|--------|
| <b>Molars</b>                       |      |         |         |       |            |                    |            |             |        |
| Koch and Garcia-Godoy <sup>44</sup> | 2000 | Uni. H  | 12      | 6-8   | Pro Co     | 24-60              | n          | 3           | n      |
| Lygidakis et al. <sup>45</sup>      | 2003 | Uni. H  | 46      | 8-10  | Pro Co     | 48                 | n          | 1           | n      |
| Zagdwon et al. <sup>46</sup>        | 2003 | Uni. H  | 17      | 6-16  | RCT        | 12-24              | n          | 2           | y      |
| Kotsanos et al. <sup>32</sup>       | 2005 | Uni. H  | 72      | 8     | Retro Co   | 52                 | n          | 4           | n      |
| Mejare et al. <sup>33</sup>         | 2005 | Uni. H  | 76      | 6-17  | Retro Co   | 62                 | n          | 7           | n      |
| Jalevik and Moller <sup>47</sup>    | 2007 | Uni. H  | 27      | 6-13  | Retro Co   | 44-99              | n          | 1           | n      |
| Lygidakis et al. <sup>48</sup>      | 2009 | Uni. H  | 47      | 6-7   | RCT        | 48                 | n          | 2           | n      |
| Baroni and Marchionni <sup>49</sup> | 2011 | Uni. H  | 30      | 6-9   | Pro Co     | 36                 | n          | 1           | n      |
| Gaardmand et al. <sup>50</sup>      | 2013 | Uni. H  | 33      | 8-18  | Retro Co   | 39                 | n          | 1           | n      |
| Cabasse et al. <sup>51</sup>        | 2015 | Uni. H  | 39      | 9     | Pro Co     | n                  | n          | 1           | n      |
| Fragelli et al. <sup>52</sup>       | 2015 | Uni. H  | 21      | 6-9   | Pro Co     | 12                 | n          | 1           | n      |
| Bekes et al. <sup>53</sup>          | 2016 | Uni. H  | 16      | 8     | Pro Co     | 2                  | n          | 2           | y      |
| Bakkal et al. <sup>54</sup>         | 2017 | Uni. H  | 38      | 7-12  | RCT        | 1                  | n          | 2           | n      |
| de Souza et al. <sup>55</sup>       | 2017 | Uni. H  | 18      | 6-8   | RCT        | 18                 | y          | 2           | n      |
| Fragelli et al. <sup>56</sup>       | 2017 | Uni. H  | 21      | 6-8   | RCT        | 18                 | n          | 2           | y      |
| Sönmez and Saat <sup>57</sup>       | 2017 | Uni. H  | 42      | 8-12  | RCT        | 24                 | n          | 4           | n      |
| Dixit and Joshi <sup>58</sup>       | 2018 | Uni. H  | 32      | 8-14  | RCT        | n/a                | n          | 2           | y      |
| Folayan et al. <sup>59</sup>        | 2018 | Uni. H  | 73      | 8-16  | Pro Co     | n/a                | n          | 2           | n      |
| Grossi et al. <sup>60</sup>         | 2018 | Uni. H  | 40      | 7-13  | Pro Co     | 12                 | y          | 1           | n      |
| Koleventi et al. <sup>61</sup>      | 2018 | Uni. H  | 14      | 11    | Pro Co     | 6                  | n          | 2           | n      |
| Pasini et al. <sup>62</sup>         | 2018 | Uni. H  | 40      | 8-13  | Pro Co     | 4                  | n          | 2           | n/a    |
| Dhareula et al. <sup>63</sup>       | 2019 | Uni. H  | 30      | 8-13  | RCT        | 36                 | y          | 2           | y      |
| <b>Incisors</b>                     |      |         |         |       |            |                    |            |             |        |
| Wong and Winter <sup>64</sup>       | 2002 | Uni. H  | 15      | n/a   | RCT        | 6                  | n          | 1           | n      |
| Özgül et al <sup>65</sup>           | 2013 | Uni. H  | 33      | 7-12  | RCT        | 1                  | n          | 6           | n      |
| Sheoran et al. <sup>66</sup>        | 2014 | Uni. H  | 25      | 11-13 | RCT        | 1                  | n          | 2           | n      |
| Restrepo et al. <sup>67</sup>       | 2016 | Uni. H  | 51      | 9-12  | Pro Co     | 1                  | n          | 2           | y      |
| Bhandari et al. <sup>68</sup>       | 2018 | Uni. H  | n/a     | 7-16  | Pro Co     | 6                  | n          | 1           | n      |
| Hasmun et al. <sup>69</sup>         | 2018 | Uni. H  | 111     | 7-16  | Pro Co     | n/a                | n          | 1           | y      |

1  
2  
3  
4  
5  
6  
7  
8  
9  
10  
11  
12  
13  
14  
15  
16  
17  
18  
19  
20  
21  
22  
23  
24  
25  
26  
27  
28  
29  
30  
31  
32  
33  
34  
35  
36  
37  
38  
39  
40  
41  
42  
43  
44  
45  
46  
47  
48  
49  
50  
51  
52  
53  
54  
55  
56  
57  
58  
59  
60**Only Registered**

|                     |             |        |     |      |        |     |   |   |     |
|---------------------|-------------|--------|-----|------|--------|-----|---|---|-----|
| <b>DRKS00009760</b> | <b>2016</b> | Uni. H | 40  | 6-70 | RCT    | 6   | y | 2 | n   |
| <b>DRKS00011882</b> | <b>2017</b> | Uni. H | 300 | 7-14 | Pro Co | 0,5 | y | 3 | n/a |
| <b>NCT03614819</b>  | <b>2018</b> | Uni. H | 122 | 6-10 | RCT    | 24  | y | 2 | n/a |
| <b>NCT03760497</b>  | <b>2018</b> | Uni. H | 300 | 6-10 | RCT    | 24  | y | 3 | n/a |
| <b>NCT03826810</b>  | <b>2019</b> | Uni. H | 48  | n/a  | RCT    | 12  | y | 2 | n/a |
| <b>NCT03870958</b>  | <b>2019</b> | Uni. H | 195 | 6-9  | RCT    | 36  | y | 2 | n/a |
| <b>NCT03862014</b>  | <b>2019</b> | Uni. H | 100 | 6-10 | RCT    | 24  | y | 2 | n/a |

**Abbreviations:** N of part., number of participants; n/a, not available; Pro Co, prospective cohort; Retro Co, retrospective cohort; RCT, randomized control trial; Uni. H, University hospital; Trial reg., trial registration, P cal., power calculation; n, no; y, yes

**Table 2.** Reported outcome category, outcome examples and outcomes measures, ordered according to the frequency of use in included studies.

| Outcome category                   | Outcome examples                                                                             | Exemplary outcome measures                                                                                                                                                                          |
|------------------------------------|----------------------------------------------------------------------------------------------|-----------------------------------------------------------------------------------------------------------------------------------------------------------------------------------------------------|
| Restoration success                | Clinical performance<br>Restoration quality<br>Survival of tooth and restoration             | Modified US Public Health Service (USPHS) criteria<br>Modified atraumatic restorative treatment (ART) criteria<br>Radiographic evaluation (Bitewings)<br>Number of reinterventions<br>Survival rate |
| Pain/ discomfort/ hypersensitivity | Response to stimulus<br>Pain during and after dental treatment/<br>intervention              | Schiff Cold Air Sensitivity Scale (SCASS)<br>Questionnaires<br>Modified behavior pain scale<br>Visual Analogue Scale (VAS)                                                                          |
| Aesthetic improvement              | Aesthetic improvement                                                                        | Questionnaires<br>Clinical photography                                                                                                                                                              |
| Mineral gain                       | Mineral gain                                                                                 | Laserfluorescence readings<br>Scanning electron microscope (SEM)/<br>Energy Dispersive X-ray Spectrometry (EDX)<br>Quantitative Light-Induced Fluorescence (QLF)                                    |
| Space management                   | Space closure after extraction<br>Need of orthodontic intervention                           | Amount of spontaneous space closure                                                                                                                                                                 |
| Anesthesia effectiveness           | Anesthesia technique<br>Need for local anesthesia                                            | Presence of pain during treatment<br>Pain efficacy scale                                                                                                                                            |
| Preventive success                 | Clinical performance<br>Sealant quality<br>Ability to prevent caries and enamel<br>breakdown | Success/ Modified US Public Health Service (USPHS) criteria                                                                                                                                         |
| Efficiency                         | Costs of treatment                                                                           | Placement time<br>Used materials<br>Laboratory costs                                                                                                                                                |
| Quality of life                    | Oral health-related quality of life<br>(OHRQoL)                                              | Self-administered oral health related quality of life (OHRQoL)<br>questionnaires (COHIP G-19, CPQ 8-10, CPQ 11-14)                                                                                  |
| Gingival and periodontal health    | Presence of gingivitis and periodontitis<br>Oral hygiene<br>Subgingival microbiota           | Gingival index (GI)<br>Pocket depth (PD)<br>Turesky plaque index<br>Checkerboard DNA-DNA hybridization                                                                                              |
| Patient satisfaction               | Patient satisfaction with treatment                                                          | Visual Analogue Scale (VAS)<br>Questionnaires                                                                                                                                                       |

**Table 3.** Primary and secondary outcomes reported in each study.

| Author (year)                              | Restoration success | Pain/ discomfort/<br>hypersensitivity | Aesthetic improvement | Mineral gain | Space management | Anesthesia effectiveness | Preventive success | Efficiency | Quality of life | Gingival and periodontal<br>health | Patient satisfaction |
|--------------------------------------------|---------------------|---------------------------------------|-----------------------|--------------|------------------|--------------------------|--------------------|------------|-----------------|------------------------------------|----------------------|
| Koch and Garcia-Godoy (2000) <sup>44</sup> | x                   |                                       |                       |              |                  |                          |                    |            |                 |                                    |                      |
| Wong and Winter (2002) <sup>64</sup>       |                     |                                       | x                     |              |                  |                          |                    |            |                 |                                    |                      |
| Lygidakis et al. (2003) <sup>45</sup>      | x                   | ♦                                     |                       |              |                  |                          | ♦                  |            |                 |                                    |                      |
| Zagdwon et al. (2003) <sup>46</sup>        | x                   |                                       |                       |              |                  |                          |                    | ♦          |                 |                                    |                      |
| Kotsanos et al. (2005) <sup>32</sup>       | x                   |                                       |                       |              | ♦                |                          |                    |            |                 |                                    |                      |
| Mejare et al. (2005) <sup>33</sup>         | x                   |                                       |                       |              | ♦                |                          |                    |            |                 |                                    |                      |
| Jalevik and Moller (2007) <sup>47</sup>    |                     |                                       |                       |              | x                |                          |                    |            |                 |                                    |                      |
| Lygidakis et al. (2009) <sup>48</sup>      | x                   |                                       |                       |              |                  |                          |                    |            |                 |                                    |                      |
| Baroni and Marchionni (2011) <sup>49</sup> |                     |                                       |                       | x            |                  |                          |                    |            |                 |                                    |                      |
| Gaardmand et al. (2013) <sup>50</sup>      | x                   |                                       |                       |              |                  |                          |                    |            |                 |                                    |                      |
| Özgül et al (2013) <sup>65</sup>           |                     | x                                     |                       |              |                  |                          |                    |            |                 |                                    |                      |
| Sheoran et al. (2014) <sup>66</sup>        |                     |                                       | x                     |              |                  |                          |                    |            |                 |                                    |                      |
| Cabasse et al. (2015) <sup>51</sup>        |                     |                                       |                       |              |                  | x                        |                    |            |                 |                                    |                      |
| Fragelli et al. (2015) <sup>52</sup>       | x                   |                                       |                       |              |                  |                          |                    |            |                 |                                    |                      |
| Bekes et al. (2016) <sup>53</sup>          |                     | x                                     |                       |              |                  |                          |                    |            |                 |                                    |                      |
| DRKS00009760 (2016)                        |                     |                                       | x                     |              |                  |                          |                    |            |                 |                                    |                      |
| Restrepo et al. (2016) <sup>67</sup>       |                     |                                       |                       | x            |                  |                          |                    |            |                 |                                    |                      |
| Bakkal et al. (2017) <sup>54</sup>         |                     |                                       |                       | x            |                  |                          |                    |            |                 |                                    |                      |
| de Souza et al. (2017) <sup>55</sup>       | x                   |                                       |                       |              |                  |                          |                    |            |                 |                                    |                      |
| DRKS00011882 (2017)                        |                     |                                       |                       |              |                  |                          |                    |            | x               |                                    |                      |
| Fragelli et al. (2017) <sup>56</sup>       | x                   |                                       |                       |              |                  |                          | ♦                  |            |                 |                                    |                      |
| Sönmez and Saat (2017) <sup>57</sup>       | x                   | ♦                                     |                       |              |                  |                          |                    |            |                 |                                    |                      |
| Bhandari et al. (2018) <sup>68</sup>       |                     |                                       | x                     |              |                  |                          |                    |            |                 |                                    |                      |
| Dixit and Joshi (2018) <sup>58</sup>       |                     | ♦                                     |                       |              |                  | x                        |                    | ♦          |                 |                                    |                      |
| Folayan et al. (2018) <sup>59</sup>        |                     |                                       |                       |              |                  |                          |                    | x          |                 |                                    |                      |
| Grossi et al. (2018) <sup>60</sup>         | x                   | ♦                                     |                       |              |                  | ♦                        |                    |            |                 |                                    |                      |
| Hasmun et al. (2018) <sup>69</sup>         |                     |                                       |                       |              |                  |                          |                    |            | x               |                                    |                      |

|    |                                       |   |   |  |   |   |   |   |
|----|---------------------------------------|---|---|--|---|---|---|---|
| 1  |                                       |   |   |  |   |   |   |   |
| 2  |                                       |   |   |  |   |   |   |   |
| 3  | Koleventi et al. (2018) <sup>61</sup> |   |   |  |   |   |   | x |
| 4  |                                       |   |   |  |   |   |   |   |
| 5  | Pasini et al. (2018) <sup>62</sup>    |   | x |  |   |   |   |   |
| 6  |                                       |   |   |  |   |   |   |   |
| 7  | NCT03614819 (2018)                    | ♦ | ♦ |  | x | ♦ | ♦ | ♦ |
| 8  |                                       |   |   |  |   |   |   |   |
| 9  | NCT03760497 (2018)                    | x | ♦ |  |   |   | ♦ | ♦ |
| 10 |                                       |   |   |  |   |   |   |   |
| 11 | Dhareula et al. (2019) <sup>63</sup>  | x | ♦ |  |   |   |   | ♦ |
| 12 |                                       |   |   |  |   |   |   |   |
| 13 | NCT03826810 (2019)                    | ♦ | x |  |   |   |   |   |
| 14 |                                       |   |   |  |   |   |   |   |
| 15 | NCT03870958 (2019)                    |   | ♦ |  | x | ♦ | ♦ |   |
| 16 |                                       |   |   |  |   |   |   |   |
| 17 | NCT03862014 (2019)                    | x |   |  |   |   |   |   |

x, primary outcome; ♦, secondary outcome



**Figure legends:**

**Figure 1.** Flow chart of the search.

**Figure 2.** Reported outcomes for MIH intervention studies over time. N number of studies using this outcome in a specific period.

**Figure 3.** Networks of comparisons made in molars. Different comparators (nodes) were compared directly with each other. The node diameter represents the number of studies involving this comparator, moreover, the number of studies is added between brackets in each node, the thickness of the edge represents the number of direct comparisons between two comparators. Certain comparators were not connected to the main network. Abbreviations: PMC, preformed metal crowns; GIC, glass ionomer cement; ART, atraumatic restorative treatment; aPDT, low-intensity laser and photodynamic Therapy; SDF, silver diamine Fluoride; ARR, atraumatic resin restoration; CPP-ACP; casein phosphopeptide-amorphous calcium phosphate; SEA, self-etching adhesive; TEA; total-etch adhesive; HCL; hydrochloric acid; NaOCl, sodium hypochlorite.

**Figure 4.** Networks of comparisons made in incisors. Different comparators (nodes) were compared directly with each other. The node diameter represents the number of studies involving this comparator, moreover, the number of studies is added between brackets in each node, the thickness of the edge the number of direct comparisons between two comparators. Certain comparators were not connected to the main network. Abbreviations: CPP-ACP; casein phosphopeptide-amorphous calcium phosphate; HCl;hydrochloric acid.



Figure 1. Flow chart of the search.

209x252mm (300 x 300 DPI)



|                                     | 2000-2003 | 2004-2007 | 2008-2011 | 2012-2015 | 2016-2019 | Total   |
|-------------------------------------|-----------|-----------|-----------|-----------|-----------|---------|
| 1. Restoration success              | 3         | 2         | 1         | 2         | 9         | 17      |
| 2. Pain/discomfort/hypersensitivity | 1         |           |           | 1         | 10        | 12      |
| 3. Aesthetic improvement            | 1         |           |           | 1         | 2         | 4       |
| 4. Mineral gain                     |           |           | 1         |           | 2         | 3       |
| 5. Space management                 |           | 3         |           |           |           | 3       |
| 6. Anesthesia effectiveness         |           |           |           | 1         | 2         | 3       |
| 7. Preventive success               | 1         |           |           |           | 3         | 4       |
| 8. Efficiency                       | 1         |           |           |           | 4         | 5       |
| 9. Quality of life                  |           |           |           |           | 5         | 5       |
| 10. Gingival and Periodontal health |           |           |           |           | 2         | 2       |
| 11. Patient satisfaction            |           |           |           |           | 2         | 2       |
| Total                               | 7         | 5         | 2         | 5         | 41        | 60      |
| %                                   | 11.67%    | 8.33%     | 3%        | 8.33%     | 68.33%    | 100.00% |

Figure 2. Reported outcomes for MIH intervention studies over time. N number of studies using this outcome in the specific period.

264x244mm (300 x 300 DPI)



Figure 3. Networks of comparisons made in molars. Different comparators (nodes) were compared directly with each other. The node diameter represents the number of studies involving this comparator, moreover the number of studies is added between brackets in each node, the thickness of the edge represents the number of direct comparisons between two comparators. Certain comparators were not connected to the main network. Abbreviations: PMC, preformed metal crowns; GIC, glass ionomer cement; ART, atraumatic restorative treatment; aPDT, low-intensity laser and photodynamic Therapy; SDF, silver diamine Fluoride; ARR, atraumatic resin restoration; CPP-ACP; casein phosphopeptide-amorphous calcium phosphate; SEA, self-etching adhesive; TEA; total-etch adhesive; HCL; hydrochloric acid; NaOCl, sodium hypochlorite.

417x218mm (300 x 300 DPI)



Figure 4. Networks of comparisons made in incisors. Different comparators (nodes) were compared directly with each other. The node diameter represents the number of studies involving this comparator, moreover the number of studies is added between brackets in each node, the thickness of the edge the number of direct comparisons between two comparators. Certain comparators were not connected to the main network. Abbreviations: CPP-ACP; casein phosphopeptide-amorphous calcium phosphate; HCL; hydrochloric acid showing studies on MIH-affected molars, while B) studies on MIH-affected incisors.

312x234mm (300 x 300 DPI)



# PRISMA 2009 Checklist

| Section/topic                      | #  | Checklist item                                                                                                                                                                                                                                                                                              | Reported on page # |
|------------------------------------|----|-------------------------------------------------------------------------------------------------------------------------------------------------------------------------------------------------------------------------------------------------------------------------------------------------------------|--------------------|
| <b>TITLE</b>                       |    |                                                                                                                                                                                                                                                                                                             |                    |
| Title                              | 1  | Identify the report as a systematic review, meta-analysis, or both.                                                                                                                                                                                                                                         | 1                  |
| <b>ABSTRACT</b>                    |    |                                                                                                                                                                                                                                                                                                             |                    |
| Structured summary                 | 2  | Provide a structured summary including, as applicable: background; objectives; data sources; study eligibility criteria, participants, and interventions; study appraisal and synthesis methods; results; limitations; conclusions and implications of key findings; systematic review registration number. | 2                  |
| <b>INTRODUCTION</b>                |    |                                                                                                                                                                                                                                                                                                             |                    |
| Rationale                          | 3  | Describe the rationale for the review in the context of what is already known.                                                                                                                                                                                                                              | 4                  |
| Objectives                         | 4  | Provide an explicit statement of questions being addressed with reference to participants, interventions, comparisons, outcomes, and study design (PICOS).                                                                                                                                                  | 4                  |
| <b>METHODS</b>                     |    |                                                                                                                                                                                                                                                                                                             |                    |
| Protocol and registration          | 5  | Indicate if a review protocol exists, if and where it can be accessed (e.g., Web address), and, if available, provide registration information including registration number.                                                                                                                               | 4-6                |
| Eligibility criteria               | 6  | Specify study characteristics (e.g., PICOS, length of follow-up) and report characteristics (e.g., years considered, language, publication status) used as criteria for eligibility, giving rationale.                                                                                                      | 5                  |
| Information sources                | 7  | Describe all information sources (e.g., databases with dates of coverage, contact with study authors to identify additional studies) in the search and date last searched.                                                                                                                                  | 4                  |
| Search                             | 8  | Present full electronic search strategy for at least one database, including any limits used, such that it could be repeated.                                                                                                                                                                               | 4                  |
| Study selection                    | 9  | State the process for selecting studies (i.e., screening, eligibility, included in systematic review, and, if applicable, included in the meta-analysis).                                                                                                                                                   | 5                  |
| Data collection process            | 10 | Describe method of data extraction from reports (e.g., piloted forms, independently, in duplicate) and any processes for obtaining and confirming data from investigators.                                                                                                                                  | 4-5                |
| Data items                         | 11 | List and define all variables for which data were sought (e.g., PICOS, funding sources) and any assumptions and simplifications made.                                                                                                                                                                       | 5                  |
| Risk of bias in individual studies | 12 | Describe methods used for assessing risk of bias of individual studies (including specification of whether this was done at the study or outcome level), and how this information is to be used in any data synthesis.                                                                                      | 5                  |
| Summary measures                   | 13 | State the principal summary measures (e.g., risk ratio, difference in means).                                                                                                                                                                                                                               | 7                  |
| Synthesis of results               | 14 | Describe the methods of handling data and combining results of studies, if done, including measures of consistency (e.g., $I^2$ ) for each meta-analysis.                                                                                                                                                   | 5-6                |



# PRISMA 2009 Checklist

| Section/topic                 | #  | Checklist item                                                                                                                                                                                           | Reported on page # |
|-------------------------------|----|----------------------------------------------------------------------------------------------------------------------------------------------------------------------------------------------------------|--------------------|
| Risk of bias across studies   | 15 | Specify any assessment of risk of bias that may affect the cumulative evidence (e.g., publication bias, selective reporting within studies).                                                             | -                  |
| Additional analyses           | 16 | Describe methods of additional analyses (e.g., sensitivity or subgroup analyses, meta-regression), if done, indicating which were pre-specified.                                                         | 7                  |
| <b>RESULTS</b>                |    |                                                                                                                                                                                                          |                    |
| Study selection               | 17 | Give numbers of studies screened, assessed for eligibility, and included in the review, with reasons for exclusions at each stage, ideally with a flow diagram.                                          | 6                  |
| Study characteristics         | 18 | For each study, present characteristics for which data were extracted (e.g., study size, PICOS, follow-up period) and provide the citations.                                                             | 7                  |
| Risk of bias within studies   | 19 | Present data on risk of bias of each study and, if available, any outcome level assessment (see item 12).                                                                                                | 7                  |
| Results of individual studies | 20 | For all outcomes considered (benefits or harms), present, for each study: (a) simple summary data for each intervention group (b) effect estimates and confidence intervals, ideally with a forest plot. | -                  |
| Synthesis of results          | 21 | Present results of each meta-analysis done, including confidence intervals and measures of consistency.                                                                                                  | -                  |
| Risk of bias across studies   | 22 | Present results of any assessment of risk of bias across studies (see Item 15).                                                                                                                          | -                  |
| Additional analysis           | 23 | Give results of additional analyses, if done (e.g., sensitivity or subgroup analyses, meta-regression [see Item 16]).                                                                                    | 8                  |
| <b>DISCUSSION</b>             |    |                                                                                                                                                                                                          |                    |
| Summary of evidence           | 24 | Summarize the main findings including the strength of evidence for each main outcome; consider their relevance to key groups (e.g., healthcare providers, users, and policy makers).                     | 8-10               |
| Limitations                   | 25 | Discuss limitations at study and outcome level (e.g., risk of bias), and at review-level (e.g., incomplete retrieval of identified research, reporting bias).                                            | 9                  |
| Conclusions                   | 26 | Provide a general interpretation of the results in the context of other evidence, and implications for future research.                                                                                  | -                  |
| <b>FUNDING</b>                |    |                                                                                                                                                                                                          |                    |
| Funding                       | 27 | Describe sources of funding for the systematic review and other support (e.g., supply of data); role of funders for the systematic review.                                                               | 11                 |

From: Moher D, Liberati A, Tetzlaff J, Altman DG, The PRISMA Group (2009). Preferred Reporting Items for Systematic Reviews and Meta-Analyses: The PRISMA Statement. PLoS Med 6(6): e1000097. doi:10.1371/journal.pmed1000097

For more information, visit: [www.prisma-statement.org](http://www.prisma-statement.org).

# BMJ Open

## Outcome and comparator choice in Molar Incisor Hypomineralization (MIH) Intervention Studies: A Systematic Review and Social Network Analysis

|                                 |                                                                                                                                                                                                                                                                                                                                                                                                                                                                                 |
|---------------------------------|---------------------------------------------------------------------------------------------------------------------------------------------------------------------------------------------------------------------------------------------------------------------------------------------------------------------------------------------------------------------------------------------------------------------------------------------------------------------------------|
| Journal:                        | <i>BMJ Open</i>                                                                                                                                                                                                                                                                                                                                                                                                                                                                 |
| Manuscript ID                   | bmjopen-2018-028352.R3                                                                                                                                                                                                                                                                                                                                                                                                                                                          |
| Article Type:                   | Research                                                                                                                                                                                                                                                                                                                                                                                                                                                                        |
| Date Submitted by the Author:   | 01-Jul-2019                                                                                                                                                                                                                                                                                                                                                                                                                                                                     |
| Complete List of Authors:       | Elhennawy, Karim; Charite Universitätsmedizin Berlin, Department of Orthodontics, Dentofacial Orthopedics and Pedodontics<br>Krois, Joachim; Charite Universitätsmedizin Berlin, Department of Operative and Preventive Dentistry<br>Jost-Brinkmann, Paul-Georg; Charite Medical Faculty Berlin, Department of Orthodontics, Dentofacial Orthopedics and Pedodontics<br>Schwendicke, Falk; Charite Universitätsmedizin Berlin, Department of Operative and Preventive Dentistry |
| <b>Primary Subject Heading</b>: | Dentistry and oral medicine                                                                                                                                                                                                                                                                                                                                                                                                                                                     |
| Secondary Subject Heading:      | Dentistry and oral medicine, Evidence based practice, Health services research, Research methods                                                                                                                                                                                                                                                                                                                                                                                |
| Keywords:                       | Systematic review, Molar incisor hypomineralization, core outcome set, MIH, prevention, management                                                                                                                                                                                                                                                                                                                                                                              |
|                                 |                                                                                                                                                                                                                                                                                                                                                                                                                                                                                 |

SCHOLARONE™  
Manuscripts



1  
2  
3 **Outcome and comparator choice in Molar Incisor Hypomineralization (MIH)**  
4 **Intervention Studies: A Systematic Review and Social Network Analysis**  
5

6 Karim Elhennawy<sup>1, 2\*</sup>, Joachim Krois<sup>2</sup>, Paul-Georg Jost-Brinkmann<sup>1</sup>, Falk  
7 Schwendicke<sup>2</sup>  
8

9  
10 <sup>1</sup> Centre for Dental and Craniofacial Sciences, Department of Orthodontics,  
11 Dentofacial Orthopedics and Pedodontics, Charité - Universitätsmedizin Berlin,  
12 Germany, Aßmannshauer Str. 4-6, 14197 Berlin, Germany  
13

14 <sup>2</sup> Centre for Dental and Craniofacial Sciences, Department of Operative and  
15 Preventive Dentistry, Charité - Universitätsmedizin Berlin, Germany, Aßmannshauer  
16 Str. 4-6, 14197 Berlin, Germany  
17

18 **\* Corresponding author:**  
19

20 Karim Elhennawy  
21

22 Charité Universitätsmedizin, Centre for Dental and Craniofacial Sciences  
23

24 Department of Orthodontics, Dentofacial Orthopedics and Pedodontics and  
25 Department of Operative and Preventive Dentistry  
26

27 Aßmannshauer Str. 4-6  
28

29 14197 Berlin, Germany  
30

31 **Phone:** +49 30 450 562594  
32

33 **Fax:** +49 30 450 562952  
34

35 **E-Mail:** [Karim.elhennawy@charite.de](mailto:Karim.elhennawy@charite.de)  
36  
37

38 **Keywords**  
39

40 Systematic review, molar incisor hypomineralization, core outcome set, outcomes,  
41 MIH, prevention, management, intervention  
42  
43

44  
45 **Tables:** 3  
46

47 **Figures:** 4  
48  
49  
50  
51  
52  
53  
54  
55  
56  
57  
58  
59  
60

## Abstract

**Objectives:** Outcome and comparator choice strongly determine the validity and implementation of clinical trial results. We aimed to assess outcome and comparator choice in intervention studies on Molar Incisor Hypomineralization (MIH) using systematic review and social network analysis (SNA).

**Design and data sources:** Medline, Embase, Cochrane Central, Google Scholar, opengrey.eu as well as DRKS.de and Clinicaltrials.gov were searched for MIH intervention studies. The search covered the period from 1980-2019.

**Eligibility criteria:** Clinical single-/multi-arm, controlled/uncontrolled studies reporting on the management of MIH were included. Reported outcomes and comparators were extracted and categorized. SNA was used to evaluate comparator choice and the resulting trial networks.

**Data extraction:** Of the 7979 identified records, 100 were evaluated in full-text and 35 studies (17 randomized controlled trials, 14 prospective and 4 retrospective cohort studies) were included.

**Results:** In total, 2124 patients with a mean age of 11 years (min/max 6/70 years) were included. Outcomes fell in one of 11 different outcome categories: Restoration success, Aesthetic improvement, Pain/ hypersensitivity/ discomfort, Mineral gain, Space management, Anesthesia effectiveness, Preventive success, Efficiency, Quality of life, Gingival and periodontal health, and Patient satisfaction. Comparators were mainly restorative interventions (17 studies), remineralization (3), treatment of hypersensitivity (10), aesthetic interventions (5), and orthodontic interventions (3). Two highly clustered comparator networks emerged; many interventions were not robustly linked to these networks.

**Conclusions:** MIH intervention studies recorded both clinically- and patient-centered outcomes. Core Outcome Set (COS) development should consider these and supplement them with outcomes on, for example, applicability. The high number of compared interventions tested in only few studies and our SNA results implicate that the current evidence may not be robust.

### Strengths and limitations of this study

- Molar incisor hypomineralization (MIH) is a frequent condition. No core outcome set on MIH exists.
- Outcomes and comparators for MIH studies were assessed using a systematic review.
- A network analysis was performed to evaluate the robustness of comparisons.
- The findings of this study will aid in core outcomes definition.
- The available body of evidence is limited and likely not robust.

For peer review only

## Introduction

There is increasing interest in the internal and external validity of clinical studies, as indicated, for example, by their risk of bias<sup>1 2</sup> or their reporting quality<sup>3</sup>. Two aspects that only recently came into the focus, but have an impact on the validity are (1) outcome and (2) comparator choice.

So far, most clinical researchers chose the outcomes based on their understanding of what was relevant or not; the involvement of further stakeholders into outcome choice was seldom considered. This impacts on the relevance of study findings and may limit their applicability. Also, researchers usually collected a range of outcomes, without necessarily reporting all of them later on (selective reporting); mainly as data on outcomes with unwanted findings (which may nevertheless be relevant) can be omitted. The chosen outcomes and outcome measures may further suffer from limited comparability across studies, decreasing the chance to make the best use of clinical studies by synthesizing them. Outcome choice is thus relevant for study validity, applicability, and relevance, and implementation into practice<sup>4-6</sup>.

Comparator choice impacts on the overall usefulness and validity of evidence<sup>7</sup>. Again, usually, most clinical researchers choose the comparators themselves, without necessarily consulting patients or further stakeholders such as insurers, regulators, etc. Comparators relevant to patients, for example, may hence not be evaluated, while other comparators may be over-proportionally employed<sup>8-10</sup>. The resulting gaps in the evidence may mean important data on possibly useful comparators are unavailable. Also, comparisons against placebo or no intervention (in single arm studies) or less effective options (so-called straw men) can lead to overestimation of effectiveness<sup>9-11</sup>. Repeated chain-linked comparisons against less-than-optimal standards were found to significantly distort the totality of evidence<sup>9-11</sup>. Comparator choice is relevant to make clinical research in a specific field useable, applicable, and informative.

The present study assessed outcome and comparator choice in intervention studies on Molar Incisor Hypomineralisation (MIH), a highly prevalent dental developmental disorder with a significant burden for patients and high treatment needs<sup>12</sup>. MIH is characterized by demarcated creamy-white, yellowish-brown or brown lesions with or without posteruptive enamel breakdown and hypersensitivity, affecting the permanent molars with or without additional affection of the incisors<sup>13-15</sup>. The severity of the

1  
2  
3 lesions, the symptomatology of the affected tooth as well as the patient's dental age,  
4 caries risk and expectations need to be considered in the management of MIH <sup>15</sup>.  
5 Dentists often need to employ different treatment strategies when dealing with MIH  
6 patients, including restoring cavities, alleviating pain or improving aesthetics <sup>16, 17</sup>.  
7 Given the broad spectrum of clinical presentations, individual needs and available  
8 treatment modalities, managing MIH is challenging for most practitioners <sup>13-15</sup>.  
9  
10  
11  
12  
13

14 Assessing the outcome and comparator choice in MIH intervention studies seems  
15 warranted. Such an assessment is further useful to inform the development of a Core  
16 Outcome Set (COS) for MIH management and prevention studies. COS are a  
17 minimum set of outcomes that have been agreed in a systematic consensus process  
18 by a diverse group of stakeholders (patients, dentists, researchers, insurance  
19 companies, etc). COS overcome the problem of a possibly limited relevance of chosen  
20 outcomes, the risk of selective reporting and the lack of synthesizability of study  
21 findings <sup>18</sup>. A range of COS development initiatives is currently underway in dentistry  
22 <sup>19-23</sup>.  
23  
24  
25  
26  
27  
28  
29

30 We aimed to review the outcomes used in MIH intervention studies to inform the  
31 development of a COS on MIH. We further aimed to assess the comparators used in  
32 these studies and to analyze the resulting study network. This was done using social  
33 network analysis (SNA), a method for evaluating the relationships between factors in  
34 a network <sup>8</sup>, which has been introduced to dentistry recently <sup>24</sup>. As secondary aim, we  
35 evaluated if studies clearly indicated their primary outcome, if studies used a sample  
36 size estimation based on this outcome, and if studies were registered a priori, as  
37 should be expected.  
38  
39  
40  
41  
42  
43  
44  
45  
46

## 47 **Methods**

48 This review was registered on the Core Outcome Measures in Effectiveness Trials  
49 (COMET) initiative website <sup>1</sup>. In parts, it builds on a previously published review on  
50 MIH management <sup>25</sup>.  
51  
52  
53  
54  
55

### 56 *Search strategy*

57 The following search was adapted for each database:  
58  
59  
60

1  
2  
3 (treatment OR management OR prevention) AND (molar incisor hypomineralisation  
4 OR molar incisor hypomineralization OR mih).  
5  
6

7 Searches were developed and run individually for Medline, Embase, Cochrane  
8 Central, Google Scholar, opengrey.eu as well as DRKS and Clinicaltrials.gov and  
9 cross references were performed without any language restrictions (online  
10 supplementary appendix 1). The search covered the period from 01.01.1980 to  
11 03.04.2019 (Fig. 1).  
12  
13  
14  
15

### 16 17 18 *Data collection* 19

20  
21 Inclusion criteria: We included all types of clinical studies (retrospective or prospective,  
22 controlled trials or cohort studies) in patients diagnosed with MIH. Note that studies  
23 conducted before 2001 on the condition will not have employed the term “MIH”, and  
24 may have been missed by our search. This, however, was accepted, as without a clear  
25 case definition, other conditions may have been captured by these studies too, without  
26 being able to separate conditions post hoc. Studies reported on prevention and/or  
27 management interventions for MIH teeth. There were no restrictions on setting, time  
28 of follow-up, or patients’ age. Case reports or case series with a sample size of < 10  
29 participants were excluded. No language restriction was set; studies in languages  
30 other than English, German or Arabic (if present) were translated by native speakers.  
31 Selection process: Two authors (FS, KE) screened titles independently and compared  
32 their findings. In case of disagreement, titles were included to obtain full-texts. Full-  
33 texts were assessed independently after de-duplication. In cases of disagreement,  
34 studies were included after consensus was reached through discussion.  
35  
36  
37  
38  
39  
40  
41  
42  
43  
44

45 Data extraction: The following data was extracted duplicatively and independently by  
46 two authors (KE and FS) following calibration using a pilot database:  
47  
48

- 49 • Study details (author name, title, journal, year of publication);
  - 50 • Study characteristics;
    - 51 ○ Study setting (primary or secondary care)
    - 52 ○ Number and age of participants
    - 53 ○ Study type (controlled or uncontrolled, pro- or retrospective)
    - 54 ○ Target condition (MIH lesions on molars, incisors, or both)
    - 55 ○ Number of study arms
- 56  
57  
58  
59  
60

- Interventions compared
- Follow-up period
- Outcomes assessed, separated for primary and secondary outcome(s).  
An outcome was considered a primary outcome if it was stated as such, or where the report clearly focused on one outcome. If no primary outcome was identifiable or multiple outcomes were reported, these were considered secondary outcomes.
- Outcome measures
  - Sample size estimation (yes/no)
  - Trial registration (yes/no).

### *Data synthesis*

A list of outcomes was compiled and outcomes with different verbatim terms but similar meanings gathered using a single agreed term. Outcomes were grouped within outcome categories; these were refined through group discussion before all outcomes were categorized using the final agreed terms. The final list of outcome categories comprised 11 items; Restoration success, Aesthetic improvement, Pain and hypersensitivity management, Mineral gain, Space management, Anesthesia effectiveness, Preventive success, Efficiency, Quality of life, Gingival and Periodontal health, and Patient satisfaction. The use of different outcome categories was analyzed via descriptive statistics. Exemplary outcomes and outcome measures were allocated to one of these outcome categories by discussion and agreement of two authors (KE and FS). Where there was disagreement, a consensus was achieved through discussion with all authors.

A list of comparators was compiled and comparators were grouped into agreed categories. The granularity of these categories allowed to capture specific comparators (like “glass ionomer cement restoration”) while grouping similar comparators in the same category (e.g. different cement brands). Comparator choice was analyzed via SNA. In SNA, nodes (termed ‘vertices’) are formed by comparators and are connected by edges (comparisons made within the same trial). In a graphical analysis, the node diameter represents the number of comparator arms forming the node and thickness of edges represents the number of direct comparisons. We

1  
2  
3 performed separate analyses (and graphic representations) for studies on MIH in  
4 molars versus incisors. Statistical analysis included the assessment of the degree  
5 (average number of comparators per node) and the clustering coefficient (values of  
6 one indicate that all possible connections were made, while values of 0 indicate that  
7 only the minimum number of connections were made) <sup>26-28</sup>. Statistical analysis was  
8 only performed for the main network in each sub-analysis (molars; incisors). The  
9 Python package NetworkX was used.  
10  
11  
12  
13  
14  
15  
16  
17

### 18 *Patient and public involvement*

19 Patients were not involved in this study at this point but will be during the core  
20 outcomes definition.  
21  
22  
23

## 24 **Results**

### 25 *Included studies*

26 The database search yielded 7979 records; 4106 remained after de-duplication. There  
27 were 100 potentially relevant articles and the full texts of all these 100 articles were  
28 located (100% retrieval rate); 35 met the inclusion criteria and were included (Fig. 1).  
29  
30  
31  
32  
33  
34  
35  
36  
37

### 38 *Characteristics of included trials*

39 Of the 35 included studies, all (100%) were conducted in a secondary care setting  
40 (hospital or university). The total number of participants was 2124; per study, a mean  
41 of 60 (range 12 – 300) participants were included. Only children (mean age < 12 years)  
42 were included in 33 included reports (94%). Only one (3%) study reported on adults  
43 (mean age 33 years). In two other publications (6%) it was not possible to determine  
44 the age of the participants. There were 10 (29%) one-arm studies, 18 (51%) two-arm  
45 studies, 3 (9%) three-arm studies, and 4 (11%) multi-arm studies. Further details on  
46 the included studies can be found in Table 1.  
47  
48  
49  
50  
51  
52  
53  
54  
55  
56  
57  
58  
59  
60



### *Outcome choice*

In total, 11 outcome categories were deduced from the included studies (Fig. 2, Table 2). The most frequent specific categories were “Restoration success” and “Pain/discomfort/ hypersensitivity”; with 17 (49%) and 12 (34%) studies reporting them, respectively. The next most common were “Quality of life” and “Efficiency” (each 5 studies, 14%); “Aesthetic improvement” and “Preventive success” (4 studies, 11%); “Mineral gain”, “Space management” and “Anesthesia effectiveness” (each 3 studies, 9%). The least common ones were “Patient satisfaction” and “Gingival and periodontal health” (each 2 studies, or 6%). Outcome categories that have increased in use (from 2000-2009 to 2010-2018) included “Aesthetic improvement”, “Mineral gain”, “Efficiency”, and “Gingival and periodontal health”.

### *Findings for molars*

For molars, 10 outcome categories were identified from the included studies. Those were: “Restoration success” with a total of 17/28 studies reporting on it (15/17 as primary outcome and 2/17 as secondary outcome); “Pain/discomfort/hypersensitivity” with a total of 12/28 studies reporting on it (4/12 as primary outcome and 8/11 as secondary outcome); “Quality of life” with a total of 5/28 studies reporting on it (2/5 as primary outcome and 3/5 as secondary outcome); “Efficiency” with a total of 5/28 studies reporting on it (1/5 as primary outcome and 4/5 as secondary outcome); “Preventive success” with a total of 4/28 studies reporting on it (3/4 as primary outcome and 1/4 as secondary outcome); “Anesthesia effectiveness” with a total of 3/28 studies reporting on it (2/3 as primary outcome and 1/3 as secondary outcome); “Space management” with a total of 3/28 studies reporting on it (1/3 as primary outcome and 2/3 as secondary outcome); “Mineral gain” with a total of 2/28 studies reporting on it (all as primary outcome); “Gingival and periodontal health” with a total of 2/28 studies reporting on it (1/2 as primary outcome and 1/2 as secondary outcome); “Patient satisfaction” with a total of 2/28 studies reporting on it (all as secondary outcome).

### *Findings for incisors*

1  
2  
3 For incisors, only four outcome categories were identified from the included studies.  
4 Those were: “Aesthetic improvement” with a total of 4/7 studies reporting on it (all as  
5 primary outcome); “Pain/discomfort/hypersensitivity” with a total of 1/7 study reporting  
6 on it (as primary outcome); “Quality of life” with a total of 1/7 study reporting on it (as  
7 primary outcome); “Mineral gain” with a total of 1/7 study reporting on it (as primary  
8 outcome).  
9  
10  
11  
12  
13  
14  
15

### 16 *Comparator choice*

17  
18 Two separate analyses on comparator choice were performed; one for studies on  
19 molars and one on incisors. In both groups, a loosely connected main network and  
20 several further, unconnected networks or comparators were present, indicating poor  
21 connectivity between comparators (Figs. 3 and 4). Certain comparators were more  
22 frequently chosen than others.  
23  
24  
25  
26

27 In molars (Fig. 3), many studies compared different restorative strategies, for example,  
28 composite (with different brands also tested against each other), metal, ceramic or  
29 cement restorations. Further comparisons, non-connected to this main (restorative)  
30 network, involved caries preventive interventions, management of hypersensitivity,  
31 and cavity preparation and condition techniques. The mean degree of the main,  
32 restorative network was 5.9, with a density of 0.49. The cluster coefficient (which  
33 ranges from 0 – no clustering – to 1 – maximum clustering) was 0.76, indicating that  
34 there was significant clustering, with certain comparators being compared with each  
35 other (in “cliques”), while other possible comparisons (against comparators outside of  
36 these cliques) not having been made.  
37  
38  
39  
40  
41  
42  
43  
44

45 In incisors (Fig. 4), a main network, comparing different remineralization strategies,  
46 emerged, with two further networks and two further, non-connected comparators on  
47 aesthetic management of MIH. The mean degree of the main (remineralization)  
48 network was 5, with a density of 1.0. The cluster coefficient was 1.0, indicating that  
49 there were “cliques” of comparators present, with comparators being mainly compared  
50 within and not across these cliques.  
51  
52  
53  
54  
55  
56  
57  
58  
59  
60

### *Primary outcome and sample size calculation*

Primary outcomes could be identified in all 35 (100%) reports (Table 3). Throughout all years (2000 to 2019), “Restoration success” was the most frequently assessed primary outcome (17/35). Information on sample size calculation was provided in 7 (20%) reports, all but one being published between 2016 and 2019. Of these 7 reports, 5 (71%) related this calculation to the primary outcome.

### *Trial registration reporting*

Only 10 (29%) of all articles reported a trial registration<sup>29</sup>. In the 10 years following the publication of the first CONSORT statement (2001-2010), not a single report included a trial registration. Following the publication of the second CONSORT statement (2011-2019), this increased to 29%.

## **Discussion**

This systematic review assessed outcome and comparator choice in MIH intervention studies, and their change over time. We found that studies recorded a large range of outcomes, especially when considering the limited number of studies overall, and that the diversity of these outcomes is increasing. This is reassuring, and the findings of this review are helpful to develop a COS. We also found that despite the low number of studies available, a large range of different interventions was tested, which led to the occurrence of segregated networks. Resulting from this clustering and the fact that most interventions were not well compared against alternatives, the current body of evidence on MIH interventions is likely not robust.

The outcomes used in MIH intervention studies focused on two main areas; restoration success (measured via the USPHS criteria or similar tools) and pain/ discomfort/ hypersensitivity (measured via scales like the Visual analog scale or the Schiff Cold Air Sensitivity Scale). Combined, these two areas accounted for the majority of primary and all reported outcomes. Both restoring MIH teeth and managing pain can be assumed to be the major difficulties dentists face when treating MIH. Research has shown that MIH-affected children receive and need more dental treatment compared to unaffected children<sup>30-35</sup>. Also already restored MIH-molars remain within short re-

1  
2  
3 treatment cycles <sup>30</sup>. The porous nature of MIH enamel and the presence of post  
4 eruptive enamel breakdown leads to the presence of hypersensitivity and pain, which  
5 are often the patients' chief complaints and affect their quality of life. They also  
6 increase the risk of dental fear and anxiety <sup>15 36-38</sup>. Overall, the focus on how to best  
7 restore these teeth and alleviate pain seems justified.  
8  
9

10  
11 Nevertheless, the use of other outcome categories like quality of life or efficiency  
12 appears to be growing, reflecting an ongoing shift to patient-centered care (and  
13 research) and the increasing relevance of health economics in today's resource-  
14 limited healthcare settings. We will, in the next stage of our COS development,  
15 suggest these outcomes to be included in the COS on MIH intervention studies, and  
16 will seek stakeholder consensus on their inclusion (or not).  
17  
18  
19  
20  
21

22  
23 We also investigated further outcome-related aspects in the included studies. For  
24 example, trial registration, one of the recommendations of the CONSORT statement  
25 <sup>39 40</sup>, was found in only 10 studies (and even very recent studies did not commonly  
26 report on this). While such registration may be seen as a prerogative of controlled  
27 trials, also single-arm prospective trials should clearly state what is to be investigated  
28 using which methods and tools in what population before commencing the study. This  
29 does not seem to be the case. Registration would help to reduce selective outcome  
30 reporting and could also assist in improving reporting standards (and general  
31 methodology) in MIH intervention studies.  
32  
33  
34  
35  
36  
37

38  
39 Also, of the 35 reports, only 7 studies reported a sample size calculation, and of these,  
40 only 5 related this to the primary outcome. Again, while such calculations are mainly  
41 demanded for controlled prospective trials, researchers should have a rational basis  
42 for calculating the number of participants needed in any study (regardless of its  
43 design), be it to ascertain that differences between the interventions can be detected  
44 with a planned level of statistical confidence or be it to reduce statistical noise  
45 (allowing somewhat firm conclusions). Sample size calculation is a key  
46 recommendation in the CONSORT statement, published in 2001 <sup>40</sup> and revised in  
47 2010 <sup>39</sup>. It was promising to find that, since this revision, more publications reported  
48 on a sample size calculation (while the overall number remained low).  
49  
50  
51  
52  
53  
54  
55

56  
57 Our network analysis found that most comparisons in MIH trials included few, favored  
58 comparators; many possible comparisons were never made, and some comparators  
59 were not at all compared against alternatives. Moreover, and understandable,  
60

1  
2  
3 comparators focusing on specific indications (managing pain, restoring cavities,  
4 improving aesthetics) were connected within, not between these indications. Overall,  
5 the information emerging from such poorly connected networks with regards to the  
6 relative efficacy of the interventions (answering the question of which intervention is  
7 most suited for a specific therapeutic goal) is likely not robust. The small sample sizes  
8 in most studies further add to the limited robustness of the existing evidence. Overall,  
9 the relatively “young” field of MIH research has so far not accrued sufficiently robust  
10 data which allows strong recommendations for clinicians.  
11  
12

13 This study has a number of limitations. First, the effort to improve COS methodology  
14 is ongoing, and our review used only one of several available strategies suggested for  
15 COS developers. For example, it seems that to reach saturation on outcomes and  
16 outcome categories, it may not be necessary to search multiple databases <sup>41</sup>, while  
17 we did so, also as this review was an update of a previous one and we aimed to apply  
18 the same methodology. Second, developing outcome categories and assigning  
19 specific verbatim outcomes to these categories is challenging <sup>21</sup>, often as outcomes  
20 are either inter-related or composites, capturing different outcome categories <sup>42</sup>. While  
21 there is no acknowledged MIH outcome classification system, it is clear that alternative  
22 classifications may have resulted in changes to the granularity and focus of the results.  
23 Third, researchers tend to publish multiple reports from the same clinical trial <sup>43</sup>. This  
24 can be necessary to report on the dataset at different time points or to report on  
25 multiple analyses. Data is then divided and spread across multiple publications, which  
26 makes linking or summarizing these articles very difficult. We assume to have  
27 captured all articles given that the field is limited. Last, in order to limit selective  
28 outcome bias and in the attempt of including the most recent trials, registries were  
29 searched in our study, too. This, however, has its limitations, since there are often  
30 incomplete or unclear registrations, and we were only limitedly able to extract data.  
31  
32  
33  
34  
35  
36  
37  
38  
39  
40  
41  
42  
43  
44  
45  
46  
47  
48  
49  
50  
51

## 52 **Conclusions**

53  
54 Outcomes reported in interventional trials for the management and prevention of MIH  
55 focused on the performance of restorative materials or and the management of pain  
56 and hypersensitivity associated with MIH-affected teeth. Outcomes related to oral-  
57 health related quality of life and economics have grown in use and are likely to be  
58  
59  
60

1  
2  
3 important in the future. Patient-reported or patient-centered outcomes were rarely  
4 reported. COS development should include these and may supplement them with new  
5 outcomes, e.g. on applicability. The high number of compared interventions tested in  
6 only a few studies and our SNA results implicate that current evidence may not be  
7 robust.  
8  
9  
10  
11  
12  
13  
14  
15  
16  
17  
18  
19  
20  
21  
22  
23  
24  
25  
26  
27  
28  
29  
30  
31  
32  
33  
34  
35  
36  
37  
38  
39  
40  
41  
42  
43  
44  
45  
46  
47  
48  
49  
50  
51  
52  
53  
54  
55  
56  
57  
58  
59  
60

For peer review only

**Trial status (Registration):**

COMET initiative online <http://www.comet-initiative.org/studies/details/1155> <sup>1</sup>

**Competing interests**

None declared

**Funding**

No funding was acquired.

**Ethical approval**

Not applicable.

**Author contributions**

The study was conceived by KE and FS. KE and JK analyzed, interpreted the data.

KE, P-G J-B and FS wrote the manuscript. All authors read and approved the

manuscript.

**Transparency declaration**

The lead author\* affirms that this manuscript is an honest, accurate, and transparent account of the study being reported; that no important aspects of the study have been omitted; and that any discrepancies from the study as planned (and, if relevant, registered) have been explained.

**Data availability statement**

All data relevant to the study are included in the article or uploaded as supplementary information.

## References

1. COMET. comet - initiative. org, Accessed 23 Jan 2017.
2. Higgins JPT, Altman DG, Gøtzsche PC, et al. The Cochrane Collaboration's tool for assessing risk of bias in randomised trials. *BMJ* 2011;343:d5928.
3. Schulz K, Altman DG, Moher D, et al. CONSORT 2010 Statement: updated guidelines for reporting parallel group randomised trials. *BMC Medicine* 2010;8(1):18.
4. Prinsen CA, Vohra S, Rose MR, et al. Core Outcome Measures in Effectiveness Trials (COMET) initiative: protocol for an international Delphi study to achieve consensus on how to select outcome measurement instruments for outcomes included in a 'core outcome set'. *Trials* 2014;15(1):247.
5. Chiarotto A, Ostelo RW, Turk DC, et al. Core outcome sets for research and clinical practice. *Brazilian journal of physical therapy* 2017;21(2):77-84. doi: 10.1016/j.bjpt.2017.03.001 [published Online First: 2017/05/04]
6. Levey C, Innes N, Schwendicke F, et al. Outcomes in randomised controlled trials in prevention and management of carious lesions: a systematic review. *Trials* 2017;18(1):515. doi: 10.1186/s13063-017-2256-1 [published Online First: 2017/11/04]
7. Ioannidis JP, Greenland S, Hlatky MA, et al. Increasing value and reducing waste in research design, conduct, and analysis. *Lancet* 2014;383(9912):166-75. doi: 10.1016/s0140-6736(13)62227-8 [published Online First: 2014/01/15]
8. Rizos EC, Salanti G, Kontoyiannis DP, et al. Homophily and co-occurrence patterns shape randomized trials agendas: illustration in antifungal agents. *Journal of clinical epidemiology* 2011;64(8):830-42. doi: 10.1016/j.jclinepi.2010.11.017 [published Online First: 2011/03/18]
9. Salanti G, Higgins JP, Ades AE, et al. Evaluation of networks of randomized trials. *Statistical methods in medical research* 2008;17(3):279-301. doi: 10.1177/0962280207080643 [published Online First: 2007/10/11]
10. Salanti G, Kavvoura FK, Ioannidis JP. Exploring the geometry of treatment networks. *Annals of internal medicine* 2008;148(7):544-53. [published Online First: 2008/04/02]
11. Salanti G. Indirect and mixed-treatment comparison, network, or multiple-treatments meta-analysis: many names, many benefits, many concerns for the



- 1  
2  
3 next generation evidence synthesis tool. *Research synthesis methods*  
4 2012;3(2):80-97. doi: 10.1002/jrsm.1037  
5  
6  
7 12. Schwendicke F, Elhennawy K, Reda S, et al. Global burden of molar incisor  
8 hypomineralization. *Journal of dentistry* 2018;68:10-18. doi:  
9 10.1016/j.jdent.2017.12.002 [published Online First: 2017/12/10]  
10  
11  
12 13. Weerheijm KL, Duggal M, Mejare I, et al. Judgement criteria for molar incisor  
13 hypomineralisation (MIH) in epidemiologic studies: a summary of the European  
14 meeting on MIH held in Athens, 2003. *European journal of paediatric dentistry:*  
15 *official journal of European Academy of Paediatric Dentistry* 2003;4(3):110-3.  
16 [published Online First: 2003/10/08]  
17  
18  
19  
20 14. Weerheijm KL. Molar incisor hypomineralization (MIH): clinical presentation,  
21 aetiology and management. *Dental update* 2004;31(1):9-12. [published Online  
22 First: 2004/03/06]  
23  
24  
25 15. Lygidakis NA, Wong F, Jalevik B, et al. Best clinical practice Guidance for clinicians  
26 dealing with children presenting with Molar-Incisor-Hypomineralisation (MIH):  
27 An EAPD Policy Document. *European archives of paediatric dentistry: official*  
28 *journal of the European Academy of Paediatric Dentistry* 2010;11(2):75-81.  
29 [published Online First: 2010/04/21]  
30  
31  
32  
33 16. Neves AB, Americano GCA, Soares DV, et al. Breakdown of demarcated opacities  
34 related to molar-incisor hypomineralization: a longitudinal study. *Clinical oral*  
35 *investigations* 2018. doi: 10.1007/s00784-018-2479-x [published Online First:  
36 2018/05/05]  
37  
38  
39  
40 17. Steffen R, Kramer N, Bekes K. The Würzburg MIH concept: the MIH treatment  
41 need index (MIH TNI): A new index to assess and plan treatment in patients  
42 with molar incisor hypomineralisation (MIH). *European archives of paediatric*  
43 *dentistry: official journal of the European Academy of Paediatric Dentistry*  
44 2017;18(5):355-61. doi: 10.1007/s40368-017-0301-0 [published Online First:  
45 2017/09/16]  
46  
47  
48  
49 18. Tugwell P, Boers M, Brooks P, et al. OMERACT: an international initiative to  
50 improve outcome measurement in rheumatology. *Trials* 2007;8:38. doi:  
51 10.1186/1745-6215-8-38  
52  
53  
54  
55 19. Innes NP, Schwendicke F, Lamont T. How do we create, and improve, the  
56 evidence base? *Br Dent J* 2016;220(12):651-5. doi: 10.1038/sj.bdj.2016.451  
57  
58  
59  
60

- 1  
2  
3 20. Lamont T, Schwendicke F, Innes N. Why we need a core outcome set for trials of  
4 interventions for prevention and management of caries. *Evidence-based*  
5 *dentistry* 2015;16(3):66-8. doi: 10.1038/sj.ebd.6401109 [published Online First:  
6 2015/10/24]  
7  
8
- 9  
10 21. Fleming PS, Koletsi D, O'Brien K, et al. Are dental researchers asking patient-  
11 important questions? A scoping review. *Journal of dentistry* 2016;49:9-13. doi:  
12 10.1016/j.jdent.2016.04.002 [published Online First: 2016/04/14]  
13  
14
- 15 22. Hancocks S. Asking the right questions. *British dental journal* 2016;221(2):47. doi:  
16 10.1038/sj.bdj.2016.511 [published Online First: 2016/07/23]  
17  
18
- 19 23. Smail-Faugeron V, Fron Chabouis H, Durieux P, et al. Development of a core set  
20 of outcomes for randomized controlled trials with multiple outcomes--example  
21 of pulp treatments of primary teeth for extensive decay in children. *PLoS One*  
22 2013;8(1):e51908. doi: 10.1371/journal.pone.0051908  
23  
24
- 25 24. Schwendicke F, Blunck U, Paris S, et al. Choice of comparator in restorative trials:  
26 A network analysis. *Dental materials: official publication of the Academy of*  
27 *Dental Materials* 2015;31(12):1502-9. doi: 10.1016/j.dental.2015.09.021  
28  
29
- 30 25. Elhennawy K, Schwendicke F. Managing molar-incisor hypomineralization: A  
31 systematic review. *Journal of dentistry* 2016;55:16-24. doi:  
32 10.1016/j.jdent.2016.09.012  
33  
34
- 35 26. Jackson M. Social and Economic Networks. Princeton: Princeton University Press  
36 2008.  
37  
38
- 39 27. Mahony H, Tsalatsanis A, Kumar A, et al. Evolution of treatment regimens in  
40 multiple myeloma: a social network analysis. *PloS one* 2014;9(8):e104555. doi:  
41 10.1371/journal.pone.0104555 [published Online First: 2014/08/15]  
42  
43
- 44 28. Valente T. Social networks and health: models, methods, and applications. New  
45 York: Oxford University Press 2010.  
46  
47
- 48 29. Schulz KF, Altman DG, Moher D, et al. CONSORT 2010 Statement: updated  
49 guidelines for reporting parallel group randomized trials. *Open Med*  
50 2010;4(1):e60-8.  
51  
52
- 53 30. Leppaniemi A, Lukinmaa PL, Alaluusua S. Nonfluoride hypomineralizations in the  
54 permanent first molars and their impact on the treatment need. *Caries research*  
55 2001;35(1):36-40. doi: 47428 [published Online First: 2000/12/23]  
56  
57
- 58 31. Jalevik B, Klingberg GA. Dental treatment, dental fear and behaviour management  
59 problems in children with severe enamel hypomineralization of their permanent  
60

- 1  
2  
3 first molars. *International journal of paediatric dentistry / the British Paedodontic*  
4 *Society [and] the International Association of Dentistry for Children*  
5 2002;12(1):24-32. [published Online First: 2002/02/21]  
6  
7  
8  
9 32. Kotsanos N, Kaklamanos EG, Arapostathis K. Treatment management of first  
10 permanent molars in children with molar-incisor hypomineralisation. *European*  
11 *journal of paediatric dentistry: official journal of European Academy of*  
12 *Paediatric Dentistry* 2005;6(4):179-84.  
13  
14  
15 33. Mejare I, Bergman E, Grindefjord M. Hypomineralized molars and incisors of  
16 unknown origin: treatment outcome at age 18 years. *International journal of*  
17 *paediatric dentistry / the British Paedodontic Society [and] the International*  
18 *Association of Dentistry for Children* 2005;15(1):20-8. doi: 10.1111/j.1365-  
19 263X.2005.00599.x [published Online First: 2005/01/25]  
20  
21  
22  
23 34. Chawla N, Messer LB, Silva M. Clinical studies on molar-incisor-  
24 hypomineralisation part 1: distribution and putative associations. *European*  
25 *archives of paediatric dentistry: official journal of the European Academy of*  
26 *Paediatric Dentistry* 2008;9(4):180-90. [published Online First: 2008/12/05]  
27  
28  
29 35. Jalevik B, Klingberg G. Treatment outcomes and dental anxiety in 18-year-olds  
30 with MIH, comparisons with healthy controls - a longitudinal study. *International*  
31 *journal of paediatric dentistry / the British Paedodontic Society [and] the*  
32 *International Association of Dentistry for Children* 2012;22(2):85-91. doi:  
33 10.1111/j.1365-263X.2011.01161.x [published Online First: 2011/07/26]  
34  
35  
36 36. Weerheijm KL, Jalevik B, Alaluusua S. Molar-incisor hypomineralisation. *Caries*  
37 *research* 2001;35(5):390-1. doi: 47479 [published Online First: 2001/10/20]  
38  
39  
40 37. Rodd HD, Morgan CR, Day PF, et al. Pulpal expression of TRPV1 in molar incisor  
41 hypomineralisation. *European archives of paediatric dentistry : official journal*  
42 *of the European Academy of Paediatric Dentistry* 2007;8(4):184-8. [published  
43 Online First: 2007/12/14]  
44  
45  
46 38. Fagrell TG, Lingstrom P, Olsson S, et al. Bacterial invasion of dentinal tubules  
47 beneath apparently intact but hypomineralized enamel in molar teeth with molar  
48 incisor hypomineralization. *International journal of paediatric dentistry / the*  
49 *British Paedodontic Society [and] the International Association of Dentistry for*  
50 *Children* 2008;18(5):333-40. doi: 10.1111/j.1365-263X.2007.00908.x  
51 [published Online First: 2008/03/11]  
52  
53  
54  
55  
56  
57  
58  
59  
60

- 1  
2  
3 39. Moher D, Hopewell S, Schulz KF, et al. CONSORT 2010 explanation and  
4 elaboration: updated guidelines for reporting parallel group randomised trials.  
5 *BMJ* 2010;340:c869. doi: 10.1136/bmj.c869  
6  
7
- 8 40. Moher D, Schulz KF, Altman DG. The CONSORT statement: revised  
9 recommendations for improving the quality of reports of parallel-group  
10 randomised trials. *Lancet* 2001;357(9263):1191-4.  
11  
12
- 13 41. Gargon E, Williamson PR, Clarke M. Collating the knowledge base for core  
14 outcome set development: developing and appraising the search strategy for a  
15 systematic review. *BMC medical research methodology* 2015;15:26. doi:  
16 10.1186/s12874-015-0019-9 [published Online First: 2015/04/19]  
17  
18
- 19 42. Echevarria C, Sinha IP. Heterogeneity in the measurement and reporting of  
20 outcomes in studies of electronic cigarette use in adolescents: a systematic  
21 analysis of observational studies. *Tob Control* 2016 doi:  
22 10.1136/tobaccocontrol-2015-052881  
23  
24
- 25 43. Ebrahim S, Montoya L, Kamal El Din M, et al. Randomized trials are frequently  
26 fragmented in multiple secondary publications. *Journal of clinical epidemiology*  
27 2016;79:130-39. doi: 10.1016/j.jclinepi.2016.05.016 [published Online First:  
28 2016/07/09]  
29  
30
- 31 44. Koch MJ, Garcia-Godoy F. The clinical performance of laboratory-fabricated  
32 crowns placed on first permanent molars with developmental defects. *Journal*  
33 *of the American Dental Association (1939)* 2000;131(9):1285-90.  
34  
35
- 36 45. Lygidakis NA, Chaliasou A, Siounas G. Evaluation of composite restorations in  
37 hypomineralised permanent molars: a four year clinical study. *European journal*  
38 *of paediatric dentistry: official journal of European Academy of Paediatric*  
39 *Dentistry* 2003;4(3):143-8. [published Online First: 2003/10/08]  
40  
41
- 42 46. Zagdwon AM, Fayle SA, Pollard MA. A prospective clinical trial comparing  
43 preformed metal crowns and cast restorations for defective first permanent  
44 molars. *European journal of paediatric dentistry: official journal of European*  
45 *Academy of Paediatric Dentistry* 2003;4(3):138-42. [published Online First:  
46 2003/10/08]  
47  
48
- 49 47. Jalevik B, Møller M. Evaluation of spontaneous space closure and development of  
50 permanent dentition after extraction of hypomineralized permanent first molars.  
51 *International journal of paediatric dentistry / the British Paedodontic Society*  
52  
53  
54  
55  
56  
57  
58  
59  
60

- 1  
2  
3 [and] the International Association of Dentistry for Children 2007;17(5):328-35.  
4 doi: 10.1111/j.1365-263X.2007.00849.x [published Online First: 2007/08/09]  
5  
6  
7 48. Lygidakis NA, Dimou G, Stamataki E. Retention of fissure sealants using two  
8 different methods of application in teeth with hypomineralised molars (MIH): a  
9 4 year clinical study. *European archives of paediatric dentistry: official journal  
10 of the European Academy of Paediatric Dentistry* 2009;10(4):223-6. [published  
11 Online First: 2009/12/10]  
12  
13  
14  
15 49. Baroni C, Marchionni S. MIH supplementation strategies: prospective clinical and  
16 laboratory trial. *Journal of dental research* 2011;90(3):371-6. doi:  
17 10.1177/0022034510388036 [published Online First: 2010/12/15]  
18  
19  
20  
21 50. Gaardmand E, Poulsen S, Haubek D. Pilot study of minimally invasive cast  
22 adhesive copings for early restoration of hypomineralised first permanent  
23 molars with post-eruptive breakdown. *European archives of paediatric  
24 dentistry: official journal of the European Academy of Paediatric Dentistry*  
25 2013;14(1):35-9. doi: 10.1007/s40368-012-0002-7 [published Online First:  
26 2013/03/28]  
27  
28  
29  
30  
31 51. Cabasse C, Marie-Cousin A, Huet A, et al. Computer-assisted intraosseous  
32 anaesthesia for molar and incisor hypomineralisation teeth. A preliminary study.  
33 *Odonto-stomatologie tropicale = Tropical dental journal* 2015;38(149):5-9.  
34 [published Online First: 2015/06/11]  
35  
36  
37  
38 52. Fragelli CM, Souza JF, Jeremias F, et al. Molar incisor hypomineralization (MIH):  
39 conservative treatment management to restore affected teeth. *Brazilian oral  
40 research* 2015;29 doi: 10.1590/1807-3107BOR-2015.vol29.0076 [published  
41 Online First: 2015/06/18]  
42  
43  
44  
45 53. Bekes K, Heinzelmann K, Lettner S, et al. Efficacy of desensitizing products  
46 containing 8% arginine and calcium carbonate for hypersensitivity relief in MIH-  
47 affected molars: an 8-week clinical study. *Clinical oral investigations* 2016 doi:  
48 10.1007/s00784-016-2024-8 [published Online First: 2016/12/23]  
49  
50  
51  
52 54. Bakkal M, Abbasoglu Z, Kargul B. The Effect of Casein Phosphopeptide-  
53 Amorphous Calcium Phosphate on Molar-Incisor Hypomineralisation: A Pilot  
54 Study. *Oral health & preventive dentistry* 2017;15(2):163-67. doi:  
55 10.3290/j.ohpd.a37928 [published Online First: 2017/03/23]  
56  
57  
58  
59 55. de Souza JF, Fragelli CB, Jeremias F, et al. Eighteen-month clinical performance  
60 of composite resin restorations with two different adhesive systems for molars

- 1  
2  
3 affected by molar incisor hypomineralization. *Clinical oral investigations*  
4 2017;21(5):1725-33. doi: 10.1007/s00784-016-1968-z [published Online First:  
5 2016/10/16]  
6  
7  
8  
9 56. Fragelli CMB, Souza JF, Bussaneli DG, et al. Survival of sealants in molars  
10 affected by molar-incisor hypomineralization: 18-month follow-up. *Brazilian oral*  
11 *research* 2017;31:e30. doi: 10.1590/1807-3107BOR-2017.vol31.0030  
12 [published Online First: 2017/05/11]  
13  
14  
15 57. Sonmez H, Saat S. A Clinical Evaluation of Deproteinization and Different Cavity  
16 Designs on Resin Restoration Performance in MIH-Affected Molars: Two-Year  
17 Results. *The Journal of clinical pediatric dentistry* 2017;41(5):336-42. doi:  
18 10.17796/1053-4628-41.5.336 [published Online First: 2017/09/06]  
19  
20  
21  
22 58. Dixit UB, Joshi AV. Efficacy of Intraosseous Local Anesthesia for Restorative  
23 Procedures in Molar Incisor Hypomineralization-Affected Teeth in Children.  
24 *Contemporary clinical dentistry* 2018;9(Suppl 2):S272-S77. doi:  
25 10.4103/ccd.ccd\_252\_18 [published Online First: 2018/10/09]  
26  
27  
28  
29 59. Folayan MO, Oyedele TA, Oziegbe E. Time expended on managing molar incisor  
30 hypomineralization in a pediatric dental clinic in Nigeria. *Brazilian oral research*  
31 2018;32:e79. doi: 10.1590/1807-3107bor-2018.vol32.0079 [published Online  
32 First: 2018/08/09]  
33  
34  
35  
36 60. Grossi JA, Cabral RN, Ribeiro APD, et al. Glass hybrid restorations as an  
37 alternative for restoring hypomineralized molars in the ART model. *BMC oral*  
38 *health* 2018;18(1):65. doi: 10.1186/s12903-018-0528-0 [published Online First:  
39 2018/04/20]  
40  
41  
42  
43 61. Koleventi A, Sakellari D, Arapostathis KN, et al. Periodontal Impact of Preformed  
44 Metal Crowns on Permanent Molars of Children and Adolescents: A Pilot Study.  
45 *Pediatric dentistry* 2018;40(2):117-21. [published Online First: 2018/04/18]  
46  
47  
48 62. Pasini M, Giuca MR, Scatena M, et al. Molar incisor hypomineralization treatment  
49 with casein phosphopeptide and amorphous calcium phosphate in children.  
50 *Minerva stomatologica* 2018;67(1):20-25. doi: 10.23736/s0026-  
51 4970.17.04086-9 [published Online First: 2017/10/05]  
52  
53  
54  
55 63. Dhareula A, Goyal A, Gauba K, et al. A clinical and radiographic investigation  
56 comparing the efficacy of cast metal and indirect resin onlays in rehabilitation  
57 of permanent first molars affected with severe molar incisor hypomineralisation  
58 (MIH): a 36-month randomised controlled clinical trial. *European archives of*  
59  
60

- 1  
2  
3 *paediatric dentistry: official journal of the European Academy of Paediatric*  
4 *Dentistry* 2019 doi: 10.1007/s40368-019-00430-y [published Online First:  
5 2019/03/20]  
6  
7  
8  
9 64. Wong FS, Winter GB. Effectiveness of microabrasion technique for improvement  
10 of dental aesthetics. *British dental journal* 2002;193(3):155-8. doi:  
11 10.1038/sj.bdj.4801511a [published Online First: 2002/09/06]  
12  
13 65. Ozgul BM, Saat S, Sonmez H, et al. Clinical evaluation of desensitizing treatment  
14 for incisor teeth affected by molar-incisor hypomineralization. *The Journal of*  
15 *clinical paediatric dentistry* 2013;38(2):101-5. [published Online First:  
16 2013/01/01]  
17  
18  
19  
20 66. Sheoran N, Garg S, Damle SG, et al. Esthetic management of developmental  
21 enamel opacities in young permanent maxillary incisors with two microabrasion  
22 techniques--a split mouth study. *Journal of esthetic and restorative dentistry:*  
23 *official publication of the American Academy of Esthetic Dentistry [et al]*  
24 2014;26(5):345-52. doi: 10.1111/jerd.12096 [published Online First:  
25 2014/03/05]  
26  
27  
28  
29  
30 67. Restrepo M, Jeremias F, Santos-Pinto L, et al. Effect of Fluoride Varnish on  
31 Enamel Remineralization in Anterior Teeth with Molar Incisor  
32 Hypomineralization. *The Journal of clinical pediatric dentistry* 2016;40(3):207-  
33 10. doi: 10.17796/1053-4628-40.3.207 [published Online First: 2016/07/30]  
34  
35  
36  
37 68. Bhandari R, Thakur S, Singhal P, et al. Concealment effect of resin infiltration on  
38 incisor of Grade I molar incisor hypomineralization patients: An in vivo study.  
39 *Journal of conservative dentistry: JCD* 2018;21(4):450-54. doi:  
40 10.4103/jcd.Jcd\_61\_18 [published Online First: 2018/08/21]  
41  
42  
43  
44 69. Hasmun N, Lawson J, Vettore MV, et al. Change in Oral Health-Related Quality of  
45 Life Following Minimally Invasive Aesthetic Treatment for Children with Molar  
46 Incisor Hypomineralisation: A Prospective Study. *Dentistry journal* 2018;6(4)  
47 doi: 10.3390/dj6040061 [published Online First: 2018/11/06]  
48  
49  
50  
51  
52  
53  
54  
55  
56  
57  
58  
59  
60

**Table 1.** Characteristics of included studies (n=35). Studies were separated according to target condition (MIH in molars or incisors), and ordered chronologically.

| Author                              | Year | Setting | N part. | Age   | Study type | Follow-up (months) | Trial reg. | No. of Arms | P cal. |
|-------------------------------------|------|---------|---------|-------|------------|--------------------|------------|-------------|--------|
| <b>Molars</b>                       |      |         |         |       |            |                    |            |             |        |
| Koch and Garcia-Godoy <sup>44</sup> | 2000 | Uni. H  | 12      | 6-8   | Pro Co     | 24-60              | n          | 3           | n      |
| Lygidakis et al. <sup>45</sup>      | 2003 | Uni. H  | 46      | 8-10  | Pro Co     | 48                 | n          | 1           | n      |
| Zagdwon et al. <sup>46</sup>        | 2003 | Uni. H  | 17      | 6-16  | RCT        | 12-24              | n          | 2           | y      |
| Kotsanos et al. <sup>32</sup>       | 2005 | Uni. H  | 72      | 8     | Retro Co   | 52                 | n          | 4           | n      |
| Mejare et al. <sup>33</sup>         | 2005 | Uni. H  | 76      | 6-17  | Retro Co   | 62                 | n          | 7           | n      |
| Jalevik and Moller <sup>47</sup>    | 2007 | Uni. H  | 27      | 6-13  | Retro Co   | 44-99              | n          | 1           | n      |
| Lygidakis et al. <sup>48</sup>      | 2009 | Uni. H  | 47      | 6-7   | RCT        | 48                 | n          | 2           | n      |
| Baroni and Marchionni <sup>49</sup> | 2011 | Uni. H  | 30      | 6-9   | Pro Co     | 36                 | n          | 1           | n      |
| Gaardmand et al. <sup>50</sup>      | 2013 | Uni. H  | 33      | 8-18  | Retro Co   | 39                 | n          | 1           | n      |
| Cabasse et al. <sup>51</sup>        | 2015 | Uni. H  | 39      | 9     | Pro Co     | n                  | n          | 1           | n      |
| Fragelli et al. <sup>52</sup>       | 2015 | Uni. H  | 21      | 6-9   | Pro Co     | 12                 | n          | 1           | n      |
| Bekes et al. <sup>53</sup>          | 2016 | Uni. H  | 16      | 8     | Pro Co     | 2                  | n          | 2           | y      |
| Bakkal et al. <sup>54</sup>         | 2017 | Uni. H  | 38      | 7-12  | RCT        | 1                  | n          | 2           | n      |
| de Souza et al. <sup>55</sup>       | 2017 | Uni. H  | 18      | 6-8   | RCT        | 18                 | y          | 2           | n      |
| Fragelli et al. <sup>56</sup>       | 2017 | Uni. H  | 21      | 6-8   | RCT        | 18                 | n          | 2           | y      |
| Sönmez and Saat <sup>57</sup>       | 2017 | Uni. H  | 42      | 8-12  | RCT        | 24                 | n          | 4           | n      |
| Dixit and Joshi <sup>58</sup>       | 2018 | Uni. H  | 32      | 8-14  | RCT        | n/a                | n          | 2           | y      |
| Folayan et al. <sup>59</sup>        | 2018 | Uni. H  | 73      | 8-16  | Pro Co     | n/a                | n          | 2           | n      |
| Grossi et al. <sup>60</sup>         | 2018 | Uni. H  | 40      | 7-13  | Pro Co     | 12                 | y          | 1           | n      |
| Koleventi et al. <sup>61</sup>      | 2018 | Uni. H  | 14      | 11    | Pro Co     | 6                  | n          | 2           | n      |
| Pasini et al. <sup>62</sup>         | 2018 | Uni. H  | 40      | 8-13  | Pro Co     | 4                  | n          | 2           | n/a    |
| Dhareula et al. <sup>63</sup>       | 2019 | Uni. H  | 30      | 8-13  | RCT        | 36                 | y          | 2           | y      |
| <b>Incisors</b>                     |      |         |         |       |            |                    |            |             |        |
| Wong and Winter <sup>64</sup>       | 2002 | Uni. H  | 15      | n/a   | RCT        | 6                  | n          | 1           | n      |
| Özgül et al <sup>65</sup>           | 2013 | Uni. H  | 33      | 7-12  | RCT        | 1                  | n          | 6           | n      |
| Sheoran et al. <sup>66</sup>        | 2014 | Uni. H  | 25      | 11-13 | RCT        | 1                  | n          | 2           | n      |
| Restrepo et al. <sup>67</sup>       | 2016 | Uni. H  | 51      | 9-12  | Pro Co     | 1                  | n          | 2           | y      |
| Bhandari et al. <sup>68</sup>       | 2018 | Uni. H  | n/a     | 7-16  | Pro Co     | 6                  | n          | 1           | n      |
| Hasmun et al. <sup>69</sup>         | 2018 | Uni. H  | 111     | 7-16  | Pro Co     | n/a                | n          | 1           | y      |



1  
2  
3  
4  
5  
6  
7  
8  
9  
10  
11  
12  
13  
14  
15  
16  
17  
18  
19  
20  
21  
22  
23  
24  
25  
26  
27  
28  
29  
30  
31  
32  
33  
34  
35  
36  
37  
38  
39  
40  
41  
42  
43  
44  
45  
46  
47  
48  
49  
50  
51  
52  
53  
54  
55  
56  
57  
58  
59  
60**Only Registered**

|                     |             |        |     |      |        |     |   |   |     |
|---------------------|-------------|--------|-----|------|--------|-----|---|---|-----|
| <b>DRKS00009760</b> | <b>2016</b> | Uni. H | 40  | 6-70 | RCT    | 6   | y | 2 | n   |
| <b>DRKS00011882</b> | <b>2017</b> | Uni. H | 300 | 7-14 | Pro Co | 0,5 | y | 3 | n/a |
| <b>NCT03614819</b>  | <b>2018</b> | Uni. H | 122 | 6-10 | RCT    | 24  | y | 2 | n/a |
| <b>NCT03760497</b>  | <b>2018</b> | Uni. H | 300 | 6-10 | RCT    | 24  | y | 3 | n/a |
| <b>NCT03826810</b>  | <b>2019</b> | Uni. H | 48  | n/a  | RCT    | 12  | y | 2 | n/a |
| <b>NCT03870958</b>  | <b>2019</b> | Uni. H | 195 | 6-9  | RCT    | 36  | y | 2 | n/a |
| <b>NCT03862014</b>  | <b>2019</b> | Uni. H | 100 | 6-10 | RCT    | 24  | y | 2 | n/a |

**Abbreviations:** N of part., number of participants; n/a, not available; Pro Co, prospective cohort; Retro Co, retrospective cohort; RCT, randomized control trial; Uni. H, University hospital; Trial reg., trial registration, P cal., power calculation; n, no; y, yes

**Table 2.** Reported outcome category, outcome examples and outcomes measures, ordered according to the frequency of use in included studies.

| Outcome category                   | Outcome examples                                     | Exemplary outcome measures                                                                                      |
|------------------------------------|------------------------------------------------------|-----------------------------------------------------------------------------------------------------------------|
| Restoration success                | Clinical performance                                 | Modified US Public Health Service (USPHS) criteria                                                              |
|                                    | Restoration quality                                  | Modified atraumatic restorative treatment (ART) criteria                                                        |
|                                    | Survival of tooth and restoration                    | Radiographic evaluation (Bitewings)                                                                             |
|                                    |                                                      | Number of reinterventions                                                                                       |
|                                    | Survival rate                                        |                                                                                                                 |
| Pain/ discomfort/ hypersensitivity | Response to stimulus                                 | Schiff Cold Air Sensitivity Scale (SCASS)                                                                       |
|                                    | Pain during and after dental treatment/ intervention | Questionnaires                                                                                                  |
|                                    |                                                      | Modified behavior pain scale                                                                                    |
|                                    |                                                      | Visual Analogue Scale (VAS)                                                                                     |
| Aesthetic improvement              | Aesthetic improvement                                | Questionnaires                                                                                                  |
|                                    |                                                      | Clinical photography                                                                                            |
| Mineral gain                       | Mineral gain                                         | Laserfluorescence readings                                                                                      |
|                                    |                                                      | Scanning electron microscope (SEM)/                                                                             |
|                                    |                                                      | Energy Dispersive X-ray Spectrometry (EDX)                                                                      |
|                                    |                                                      | Quantitative Light-Induced Fluorescence (QLF)                                                                   |
| Space management                   | Space closure after extraction                       | Amount of spontaneous space closure                                                                             |
|                                    | Need of orthodontic intervention                     |                                                                                                                 |
| Anesthesia effectiveness           | Anesthesia technique                                 | Presence of pain during treatment                                                                               |
|                                    | Need for local anesthesia                            | Pain efficacy scale                                                                                             |
| Preventive success                 | Clinical performance                                 | Success/ Modified US Public Health Service (USPHS) criteria                                                     |
|                                    | Sealant quality                                      |                                                                                                                 |
|                                    | Ability to prevent caries and enamel breakdown       |                                                                                                                 |
| Efficiency                         | Costs of treatment                                   | Placement time                                                                                                  |
|                                    |                                                      | Used materials                                                                                                  |
|                                    |                                                      | Laboratory costs                                                                                                |
| Quality of life                    | Oral health-related quality of life (OHRQoL)         | Self-administered oral health related quality of life (OHRQoL) questionnaires (COHIP G-19, CPQ 8-10, CPQ 11-14) |
| Gingival and periodontal health    | Presence of gingivitis and periodontitis             | Gingival index (GI)                                                                                             |
|                                    | Oral hygiene                                         | Pocket depth (PD)                                                                                               |
|                                    | Subgingival microbiota                               | Turesky plaque index                                                                                            |
|                                    |                                                      | Checkerboard DNA-DNA hybridization                                                                              |
| Patient satisfaction               | Patient satisfaction with treatment                  | Visual Analogue Scale (VAS)                                                                                     |
|                                    |                                                      | Questionnaires                                                                                                  |

**Table 3.** Primary and secondary outcomes reported in each study.

| Author (year)                              | Restoration success | Pain/ discomfort/<br>hypersensitivity | Aesthetic improvement | Mineral gain | Space management | Anesthesia effectiveness | Preventive success | Efficiency | Quality of life | Gingival and periodontal<br>health | Patient satisfaction |
|--------------------------------------------|---------------------|---------------------------------------|-----------------------|--------------|------------------|--------------------------|--------------------|------------|-----------------|------------------------------------|----------------------|
| Koch and Garcia-Godoy (2000) <sup>44</sup> | x                   |                                       |                       |              |                  |                          |                    |            |                 |                                    |                      |
| Wong and Winter (2002) <sup>64</sup>       |                     |                                       | x                     |              |                  |                          |                    |            |                 |                                    |                      |
| Lygidakis et al. (2003) <sup>45</sup>      | x                   | ♦                                     |                       |              |                  |                          | ♦                  |            |                 |                                    |                      |
| Zagdwon et al. (2003) <sup>46</sup>        | x                   |                                       |                       |              |                  |                          |                    | ♦          |                 |                                    |                      |
| Kotsanos et al. (2005) <sup>32</sup>       | x                   |                                       |                       |              | ♦                |                          |                    |            |                 |                                    |                      |
| Mejare et al. (2005) <sup>33</sup>         | x                   |                                       |                       |              | ♦                |                          |                    |            |                 |                                    |                      |
| Jalevik and Moller (2007) <sup>47</sup>    |                     |                                       |                       |              | x                |                          |                    |            |                 |                                    |                      |
| Lygidakis et al. (2009) <sup>48</sup>      | x                   |                                       |                       |              |                  |                          |                    |            |                 |                                    |                      |
| Baroni and Marchionni (2011) <sup>49</sup> |                     |                                       |                       | x            |                  |                          |                    |            |                 |                                    |                      |
| Gaardmand et al. (2013) <sup>50</sup>      | x                   |                                       |                       |              |                  |                          |                    |            |                 |                                    |                      |
| Özgül et al (2013) <sup>65</sup>           |                     | x                                     |                       |              |                  |                          |                    |            |                 |                                    |                      |
| Sheoran et al. (2014) <sup>66</sup>        |                     |                                       | x                     |              |                  |                          |                    |            |                 |                                    |                      |
| Cabasse et al. (2015) <sup>51</sup>        |                     |                                       |                       |              |                  | x                        |                    |            |                 |                                    |                      |
| Fragelli et al. (2015) <sup>52</sup>       | x                   |                                       |                       |              |                  |                          |                    |            |                 |                                    |                      |
| Bekes et al. (2016) <sup>53</sup>          |                     | x                                     |                       |              |                  |                          |                    |            |                 |                                    |                      |
| DRKS00009760 (2016)                        |                     |                                       | x                     |              |                  |                          |                    |            |                 |                                    |                      |
| Restrepo et al. (2016) <sup>67</sup>       |                     |                                       |                       | x            |                  |                          |                    |            |                 |                                    |                      |
| Bakkal et al. (2017) <sup>54</sup>         |                     |                                       |                       | x            |                  |                          |                    |            |                 |                                    |                      |
| de Souza et al. (2017) <sup>55</sup>       | x                   |                                       |                       |              |                  |                          |                    |            |                 |                                    |                      |
| DRKS00011882 (2017)                        |                     |                                       |                       |              |                  |                          |                    |            | x               |                                    |                      |
| Fragelli et al. (2017) <sup>56</sup>       | x                   |                                       |                       |              |                  |                          | ♦                  |            |                 |                                    |                      |
| Sönmez and Saat (2017) <sup>57</sup>       | x                   | ♦                                     |                       |              |                  |                          |                    |            |                 |                                    |                      |
| Bhandari et al. (2018) <sup>68</sup>       |                     |                                       | x                     |              |                  |                          |                    |            |                 |                                    |                      |
| Dixit and Joshi (2018) <sup>58</sup>       |                     | ♦                                     |                       |              |                  | x                        |                    | ♦          |                 |                                    |                      |
| Folayan et al. (2018) <sup>59</sup>        |                     |                                       |                       |              |                  |                          |                    | x          |                 |                                    |                      |
| Grossi et al. (2018) <sup>60</sup>         | x                   | ♦                                     |                       |              |                  | ♦                        |                    |            |                 |                                    |                      |
| Hasmun et al. (2018) <sup>69</sup>         |                     |                                       |                       |              |                  |                          |                    |            | x               |                                    |                      |



**Figure legends:**

**Figure 1.** Flow chart of the search.

**Figure 2.** Reported outcomes for MIH intervention studies over time. N number of studies using this outcome in a specific period.

**Figure 3.** Networks of comparisons made in molars. Different comparators (nodes) were compared directly with each other. The node diameter represents the number of studies involving this comparator, moreover, the number of studies is added between brackets in each node, the thickness of the edge represents the number of direct comparisons between two comparators. Certain comparators were not connected to the main network. Abbreviations: PMC, preformed metal crowns; GIC, glass ionomer cement; ART, atraumatic restorative treatment; aPDT, low-intensity laser and photodynamic Therapy; SDF, silver diamine Fluoride; ARR, atraumatic resin restoration; CPP-ACP; casein phosphopeptide-amorphous calcium phosphate; SEA, self-etching adhesive; TEA; total-etch adhesive; HCL; hydrochloric acid; NaOCl, sodium hypochlorite.

**Figure 4.** Networks of comparisons made in incisors. Different comparators (nodes) were compared directly with each other. The node diameter represents the number of studies involving this comparator, moreover, the number of studies is added between brackets in each node, the thickness of the edge the number of direct comparisons between two comparators. Certain comparators were not connected to the main network. Abbreviations: CPP-ACP; casein phosphopeptide-amorphous calcium phosphate; HCl;hydrochloric acid.

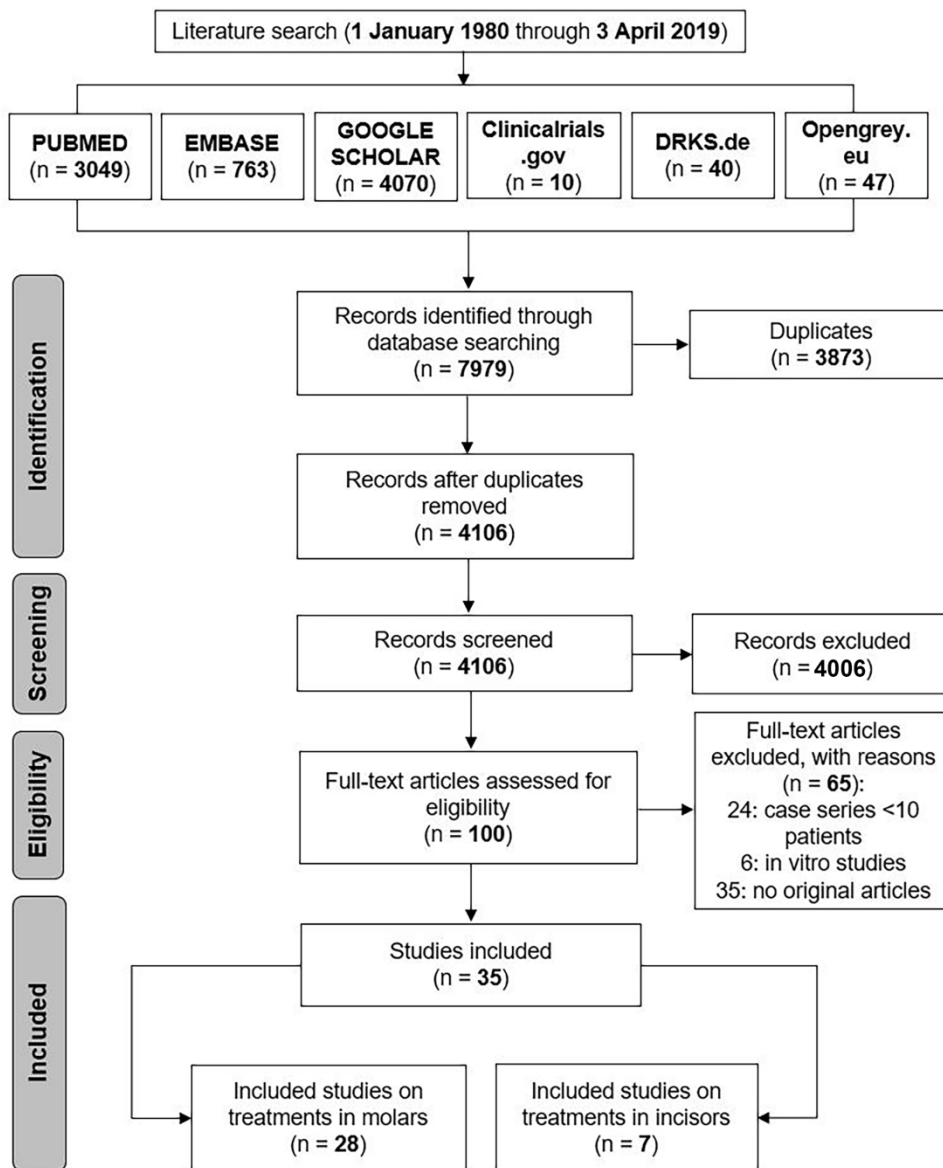

Figure 1. Flow chart of the search.

209x252mm (300 x 300 DPI)

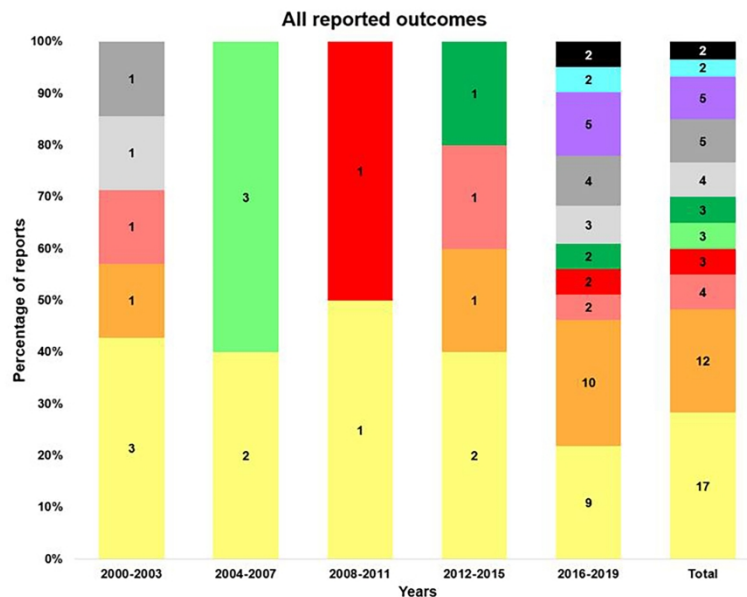

|                                     | 2000-2003 | 2004-2007 | 2008-2011 | 2012-2015 | 2016-2019 | Total   |
|-------------------------------------|-----------|-----------|-----------|-----------|-----------|---------|
| 1. Restoration success              | 3         | 2         | 1         | 2         | 9         | 17      |
| 2. Pain/discomfort/hypersensitivity | 1         |           |           | 1         | 10        | 12      |
| 3. Aesthetic improvement            | 1         |           |           | 1         | 2         | 4       |
| 4. Mineral gain                     |           |           | 1         |           | 2         | 3       |
| 5. Space management                 |           | 3         |           |           |           | 3       |
| 6. Anesthesia effectiveness         |           |           |           | 1         | 2         | 3       |
| 7. Preventive success               | 1         |           |           |           | 3         | 4       |
| 8. Efficiency                       | 1         |           |           |           | 4         | 5       |
| 9. Quality of life                  |           |           |           |           | 5         | 5       |
| 10. Gingival and Periodontal health |           |           |           |           | 2         | 2       |
| 11. Patient satisfaction            |           |           |           |           | 2         | 2       |
| Total                               | 7         | 5         | 2         | 5         | 41        | 60      |
| %                                   | 11.67%    | 8.33%     | 3%        | 8.33%     | 68.33%    | 100.00% |

Figure 2. Reported outcomes for MIH intervention studies over time. N number of studies using this outcome in the specific period.

264x244mm (300 x 300 DPI)



Figure 3. Networks of comparisons made in molars. Different comparators (nodes) were compared directly with each other. The node diameter represents the number of studies involving this comparator, moreover the number of studies is added between brackets in each node, the thickness of the edge represents the number of direct comparisons between two comparators. Certain comparators were not connected to the main network. Abbreviations: PMC, preformed metal crowns; GIC, glass ionomer cement; ART, atraumatic restorative treatment; aPDT, low-intensity laser and photodynamic Therapy; SDF, silver diamine Fluoride; ARR, atraumatic resin restoration; CPP-ACP; casein phosphopeptide-amorphous calcium phosphate; SEA, self-etching adhesive; TEA; total-etch adhesive; HCL; hydrochloric acid; NaOCl, sodium hypochlorite.

417x218mm (300 x 300 DPI)





Figure 4. Networks of comparisons made in incisors. Different comparators (nodes) were compared directly with each other. The node diameter represents the number of studies involving this comparator, moreover the number of studies is added between brackets in each node, the thickness of the edge the number of direct comparisons between two comparators. Certain comparators were not connected to the main network. Abbreviations: CPP-ACP; casein phosphopeptide-amorphous calcium phosphate; HCL; hydrochloric acid showing studies on MIH-affected molars, while B) studies on MIH-affected incisors.

312x234mm (300 x 300 DPI)

1  
2  
3 **Appendix 1**  
4  
5  
6  
7

8 **Database:**  
9

10 Medline (PUBMED)  
11  
12  
13

14 **Search period:**  
15

16 01.01.1980 to 03.04.2019  
17  
18  
19

20 **Search strategy (keywords):**  
21  
22

23 (((((treatment) OR management) OR prevention) AND molar incisor  
24 hypomineralisation) OR molar incisor hypomineralization) OR mih  
25  
26  
27  
28  
29  
30  
31  
32  
33  
34  
35  
36  
37  
38  
39  
40  
41  
42  
43  
44  
45  
46  
47  
48  
49  
50  
51  
52  
53  
54  
55  
56  
57  
58  
59  
60

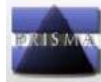

# PRISMA 2009 Checklist

| Section/topic                      | #  | Checklist item                                                                                                                                                                                                                                                                                              | Reported on page # |
|------------------------------------|----|-------------------------------------------------------------------------------------------------------------------------------------------------------------------------------------------------------------------------------------------------------------------------------------------------------------|--------------------|
| <b>TITLE</b>                       |    |                                                                                                                                                                                                                                                                                                             |                    |
| Title                              | 1  | Identify the report as a systematic review, meta-analysis, or both.                                                                                                                                                                                                                                         | 1                  |
| <b>ABSTRACT</b>                    |    |                                                                                                                                                                                                                                                                                                             |                    |
| Structured summary                 | 2  | Provide a structured summary including, as applicable: background; objectives; data sources; study eligibility criteria, participants, and interventions; study appraisal and synthesis methods; results; limitations; conclusions and implications of key findings; systematic review registration number. | 2                  |
| <b>INTRODUCTION</b>                |    |                                                                                                                                                                                                                                                                                                             |                    |
| Rationale                          | 3  | Describe the rationale for the review in the context of what is already known.                                                                                                                                                                                                                              | 4                  |
| Objectives                         | 4  | Provide an explicit statement of questions being addressed with reference to participants, interventions, comparisons, outcomes, and study design (PICOS).                                                                                                                                                  | 4                  |
| <b>METHODS</b>                     |    |                                                                                                                                                                                                                                                                                                             |                    |
| Protocol and registration          | 5  | Indicate if a review protocol exists, if and where it can be accessed (e.g., Web address), and, if available, provide registration information including registration number.                                                                                                                               | 4-6                |
| Eligibility criteria               | 6  | Specify study characteristics (e.g., PICOS, length of follow-up) and report characteristics (e.g., years considered, language, publication status) used as criteria for eligibility, giving rationale.                                                                                                      | 5                  |
| Information sources                | 7  | Describe all information sources (e.g., databases with dates of coverage, contact with study authors to identify additional studies) in the search and date last searched.                                                                                                                                  | 4                  |
| Search                             | 8  | Present full electronic search strategy for at least one database, including any limits used, such that it could be repeated.                                                                                                                                                                               | 4                  |
| Study selection                    | 9  | State the process for selecting studies (i.e., screening, eligibility, included in systematic review, and, if applicable, included in the meta-analysis).                                                                                                                                                   | 5                  |
| Data collection process            | 10 | Describe method of data extraction from reports (e.g., piloted forms, independently, in duplicate) and any processes for obtaining and confirming data from investigators.                                                                                                                                  | 4-5                |
| Data items                         | 11 | List and define all variables for which data were sought (e.g., PICOS, funding sources) and any assumptions and simplifications made.                                                                                                                                                                       | 5                  |
| Risk of bias in individual studies | 12 | Describe methods used for assessing risk of bias of individual studies (including specification of whether this was done at the study or outcome level), and how this information is to be used in any data synthesis.                                                                                      | 5                  |
| Summary measures                   | 13 | State the principal summary measures (e.g., risk ratio, difference in means).                                                                                                                                                                                                                               | 7                  |
| Synthesis of results               | 14 | Describe the methods of handling data and combining results of studies, if done, including measures of consistency (e.g., $I^2$ ) for each meta-analysis.                                                                                                                                                   | 5-6                |

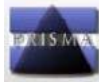

# PRISMA 2009 Checklist

| Section/topic                 | #  | Checklist item                                                                                                                                                                                           | Reported on page # |
|-------------------------------|----|----------------------------------------------------------------------------------------------------------------------------------------------------------------------------------------------------------|--------------------|
| Risk of bias across studies   | 15 | Specify any assessment of risk of bias that may affect the cumulative evidence (e.g., publication bias, selective reporting within studies).                                                             | -                  |
| Additional analyses           | 16 | Describe methods of additional analyses (e.g., sensitivity or subgroup analyses, meta-regression), if done, indicating which were pre-specified.                                                         | 7                  |
| <b>RESULTS</b>                |    |                                                                                                                                                                                                          |                    |
| Study selection               | 17 | Give numbers of studies screened, assessed for eligibility, and included in the review, with reasons for exclusions at each stage, ideally with a flow diagram.                                          | 6                  |
| Study characteristics         | 18 | For each study, present characteristics for which data were extracted (e.g., study size, PICOS, follow-up period) and provide the citations.                                                             | 7                  |
| Risk of bias within studies   | 19 | Present data on risk of bias of each study and, if available, any outcome level assessment (see item 12).                                                                                                | 7                  |
| Results of individual studies | 20 | For all outcomes considered (benefits or harms), present, for each study: (a) simple summary data for each intervention group (b) effect estimates and confidence intervals, ideally with a forest plot. | -                  |
| Synthesis of results          | 21 | Present results of each meta-analysis done, including confidence intervals and measures of consistency.                                                                                                  | -                  |
| Risk of bias across studies   | 22 | Present results of any assessment of risk of bias across studies (see Item 15).                                                                                                                          | -                  |
| Additional analysis           | 23 | Give results of additional analyses, if done (e.g., sensitivity or subgroup analyses, meta-regression [see Item 16]).                                                                                    | 8                  |
| <b>DISCUSSION</b>             |    |                                                                                                                                                                                                          |                    |
| Summary of evidence           | 24 | Summarize the main findings including the strength of evidence for each main outcome; consider their relevance to key groups (e.g., healthcare providers, users, and policy makers).                     | 8-10               |
| Limitations                   | 25 | Discuss limitations at study and outcome level (e.g., risk of bias), and at review-level (e.g., incomplete retrieval of identified research, reporting bias).                                            | 9                  |
| Conclusions                   | 26 | Provide a general interpretation of the results in the context of other evidence, and implications for future research.                                                                                  | -                  |
| <b>FUNDING</b>                |    |                                                                                                                                                                                                          |                    |
| Funding                       | 27 | Describe sources of funding for the systematic review and other support (e.g., supply of data); role of funders for the systematic review.                                                               | 11                 |

From: Moher D, Liberati A, Tetzlaff J, Altman DG, The PRISMA Group (2009). Preferred Reporting Items for Systematic Reviews and Meta-Analyses: The PRISMA Statement. PLoS Med 6(6): e1000097. doi:10.1371/journal.pmed1000097

For more information, visit: [www.prisma-statement.org](http://www.prisma-statement.org).
